# Supplementary material for: A searchable image resource of Drosophila GAL4-driver expression patterns with single neuron resolution
Source: bioRxiv preprint, doi:10.1101/2020.05.29.080473, version 3 (2022-12-03)
Supplement: Supplemental Table 1 - Included samples [file 080473_file03.xlsx]

## Sheet: Samples
Publishing Name	Landing Site	Effector	Slide Code	Creation Date	GUID	Gender	Heat Shock Minutes	Published Objectives	Fly Line Release	Lab Member
R10A06	attP2	57C10PEST_attp18_4stop1	20161028_28_D1	Sun Nov 13 18:23:46 EST 2016	Sample#2337818758959071377	m	15	20x, 63x	Annotator Gen1 MCFO	Ryo Minegishi
R10A06	attP2	57C10PEST_attp18_4stop1	20161028_28_D2	Sun Nov 13 18:23:47 EST 2016	Sample#2337818760359968913	m	15	20x	Annotator Gen1 MCFO	Ryo Minegishi
R10A06	attP2	57C10PEST_attp18_4stop1	20161028_28_D3	Sun Nov 13 18:23:47 EST 2016	Sample#2337818761786032273	m	15	20x, 63x	Annotator Gen1 MCFO	Ryo Minegishi
R10A06	attP2	57C10PEST_attp18_4stop1	20161028_28_D4	Sun Nov 13 18:23:47 EST 2016	Sample#2337818764285837457	m	15	20x	Annotator Gen1 MCFO	Ryo Minegishi
R10A06	attP2	57C10PEST_attp18_4stop1	20161028_28_D5	Sun Nov 13 18:23:48 EST 2016	Sample#2337818766580121745	m	15	20x	Annotator Gen1 MCFO	Ryo Minegishi
R10A06	attP2	57C10PEST_attp18_4stop1	20161028_28_D6	Sun Nov 13 18:23:49 EST 2016	Sample#2337818768731799697	m	15	20x, 63x	Annotator Gen1 MCFO	Ryo Minegishi
R10A07	attP2	57C10PEST_attp18_4stop1	20170210_19_A1	Sat Feb 18 17:49:46 EST 2017	Sample#2372961825059766370	f		20x, 63x	Annotator Gen1 MCFO	Jens Goldammer
R10A07	attP2	57C10PEST_attp18_4stop1	20170210_19_A2	Sat Feb 18 17:49:46 EST 2017	Sample#2372961825227538530	f		20x	Annotator Gen1 MCFO	Jens Goldammer
R10A07	attP2	57C10PEST_attp18_4stop1	20170210_19_A3	Sat Feb 18 17:49:46 EST 2017	Sample#2372961825395310690	f		20x	Annotator Gen1 MCFO	Jens Goldammer
R10A07	attP2	57C10PEST_attp18_4stop1	20170210_19_A4	Sat Feb 18 17:49:46 EST 2017	Sample#2372961825554694242	f		20x	Annotator Gen1 MCFO	Jens Goldammer
R10A07	attP2	57C10PEST_attp18_4stop1	20170210_19_A5	Sat Feb 18 17:49:46 EST 2017	Sample#2372961825714077794	f		20x	Annotator Gen1 MCFO	Jens Goldammer
R10A07	attP2	57C10PEST_attp18_4stop1	20170210_19_A6	Sat Feb 18 17:49:46 EST 2017	Sample#2372961825881849954	f		20x	Annotator Gen1 MCFO	Jens Goldammer
R10A07	attP2	57C10PEST_attp18_4stop1	20170210_19_A7	Sat Feb 18 17:49:46 EST 2017	Sample#2372961826041233506	f		20x	Annotator Gen1 MCFO	Jens Goldammer
R10A07	attP2	57C10PEST_attp18_4stop1	20170210_19_A8	Sat Feb 18 17:49:46 EST 2017	Sample#2372961826204811362	f		20x	Annotator Gen1 MCFO	Jens Goldammer
R10A07	attP2	57C10PEST_attp18_4stop1	20170210_19_B1	Sat Feb 18 17:49:46 EST 2017	Sample#2372961826368389218	f		20x	Annotator Gen1 MCFO	Jens Goldammer
R10A07	attP2	57C10PEST_brp_SNAP_MCFO_X23_0099	20181121_61_G1	Mon Dec 10 13:34:32 EST 2018	Sample#2612073583450521698	f		40x	Gen1 MCFO (40x)	NA
R10A07	attP2	57C10PEST_brp_SNAP_MCFO_X23_0099	20181121_61_G2	Mon Dec 10 13:34:32 EST 2018	Sample#2612073584025141346	f		40x	Gen1 MCFO (40x)	NA
R10A07	attP2	57C10PEST_brp_SNAP_MCFO_X23_0099	20181121_61_G3	Mon Dec 10 13:34:32 EST 2018	Sample#2612073584981442658	f		40x	Gen1 MCFO (40x)	NA
R10A07	attP2	57C10PEST_brp_SNAP_MCFO_X23_0099	20181121_61_G4	Mon Dec 10 13:34:32 EST 2018	Sample#2612073585577033826	f		40x	Gen1 MCFO (40x)	NA
R10A07	attP2	57C10PEST_brp_SNAP_MCFO_X23_0099	20181121_61_G5	Mon Dec 10 13:34:32 EST 2018	Sample#2612073586172624994	f		40x	Gen1 MCFO (40x)	NA
R10A07	attP2	57C10PEST_brp_SNAP_MCFO_X23_0099	20181121_61_G6	Mon Dec 10 13:34:33 EST 2018	Sample#2612073586764021858	f		40x	Gen1 MCFO (40x)	NA
R10A07	attP2	pBPhsFlp2_PEST_brp_SNAP_MCFO_0128	20191015_61_H1	Fri Oct 25 16:39:49 EDT 2019	Sample#2727706842716176482	m	13	40x	Gen1 MCFO (40x)	NA
R10A07	attP2	pBPhsFlp2_PEST_brp_SNAP_MCFO_0128	20191015_61_H2	Fri Oct 25 16:39:49 EDT 2019	Sample#2727706843605368930	m	13	40x	Gen1 MCFO (40x)	NA
R10A07	attP2	pBPhsFlp2_PEST_brp_SNAP_MCFO_0128	20191015_61_H3	Fri Oct 25 16:39:50 EDT 2019	Sample#2727706844494561378	m	13	40x	Gen1 MCFO (40x)	NA
R10A07	attP2	pBPhsFlp2_PEST_brp_SNAP_MCFO_0128	20191015_61_H4	Fri Oct 25 16:39:50 EDT 2019	Sample#2727706845387948130	m	13	40x	Gen1 MCFO (40x)	NA
R10A07	attP2	pBPhsFlp2_PEST_brp_SNAP_MCFO_0128	20191015_61_H5	Fri Oct 25 16:39:50 EDT 2019	Sample#2727706846210031714	m	13	40x	Gen1 MCFO (40x)	NA
R10A07	attP2	pBPhsFlp2_PEST_brp_SNAP_MCFO_0128	20191015_61_H6	Fri Oct 25 16:39:50 EDT 2019	Sample#2727706847036309602	m	13	40x	Gen1 MCFO (40x)	NA
R10A07	attP2	pBPhsFlp2_PEST_brp_SNAP_MCFO_0128	20191015_61_H7	Fri Oct 25 16:39:50 EDT 2019	Sample#2727706847850004578	m	13	40x	Gen1 MCFO (40x)	NA
R10A07	attP2	pBPhsFlp2_PEST_brp_SNAP_MCFO_0128	20191015_61_H8	Fri Oct 25 16:39:51 EDT 2019	Sample#2727706848684671074	m	13	40x	Gen1 MCFO (40x)	NA
R10A07	attP2	pBPhsFlp2_PEST_brp_SNAP_MCFO_0128	20191015_61_H9	Fri Oct 25 16:39:51 EDT 2019	Sample#2727706849515143266	m	13	40x	Gen1 MCFO (40x)	NA
R10A09	attP2	57C10PEST_attp8_3stop1	20170217_21_E4	Thu Feb 23 17:10:58 EST 2017	Sample#2374763998059954274	f		20x, 63x	Annotator Gen1 MCFO	Gabriella Sterne
R10A09	attP2	57C10PEST_attp8_3stop1	20170217_21_E5	Thu Feb 23 17:10:58 EST 2017	Sample#2374763998210949218	f		20x, 63x	Annotator Gen1 MCFO	Gabriella Sterne
R10A09	attP2	57C10PEST_brp_SNAP_MCFO_X23_0099	20180828_61_A1	Fri Sep 14 14:04:50 EDT 2018	Sample#2580538367565365346	f		40x	Gen1 MCFO (40x)	NA
R10A09	attP2	57C10PEST_brp_SNAP_MCFO_X23_0099	20180828_61_A2	Fri Sep 14 14:04:50 EDT 2018	Sample#2580538367858966626	f		40x	Gen1 MCFO (40x)	NA
R10A09	attP2	57C10PEST_brp_SNAP_MCFO_X23_0099	20180828_61_A3	Fri Sep 14 14:04:51 EDT 2018	Sample#2580538368123207778	f		40x	Gen1 MCFO (40x)	NA
R10A09	attP2	57C10PEST_brp_SNAP_MCFO_X23_0099	20180828_61_A4	Fri Sep 14 14:04:51 EDT 2018	Sample#2580538368408420450	f		40x	Gen1 MCFO (40x)	NA
R10A09	attP2	57C10PEST_brp_SNAP_MCFO_X23_0099	20180828_61_A5	Fri Sep 14 14:04:51 EDT 2018	Sample#2580538368693633122	f		40x	Gen1 MCFO (40x)	NA
R10A09	attP2	57C10PEST_brp_SNAP_MCFO_X23_0099	20180828_61_A6	Fri Sep 14 14:04:51 EDT 2018	Sample#2580538368962068578	f		40x	Gen1 MCFO (40x)	NA
R10A09	attP2	pBPhsFlp2_PEST_brp_SNAP_MCFO_0128	20191203_65_J1	Thu Dec 19 17:17:22 EST 2019	Sample#2747662722555445346	m	40	40x	Gen1 MCFO (40x)	NA
R10A09	attP2	pBPhsFlp2_PEST_brp_SNAP_MCFO_0128	20191203_65_J2	Thu Dec 19 17:17:22 EST 2019	Sample#2747662723566272610	m	40	40x	Gen1 MCFO (40x)	NA
R10A11	attP2	57C10PEST_attp18_4stop1	20140508_32_D1	Mon May 19 03:53:59 EDT 2014	Sample#2008174202422558818	f		20x	Annotator Gen1 MCFO	Aljoscha Nern
R10A11	attP2	57C10PEST_attp18_4stop1	20140508_32_D2	Mon May 09 07:36:29 EDT 2016	Sample#2269511845595316322	f		20x, 63x	Annotator Gen1 MCFO	Aljoscha Nern
R10A11	attP2	57C10PEST_attp18_4stop1	20140508_32_D3	Mon May 19 03:54:00 EDT 2014	Sample#2008174205144662114	f		20x	Annotator Gen1 MCFO	Aljoscha Nern
R10A11	attP2	57C10PEST_attp18_4stop1	20140508_32_D4	Sun Apr 24 16:35:26 EDT 2016	Sample#2264211657523724386	f		20x, 63x	Annotator Gen1 MCFO	Aljoscha Nern
R10A11	attP2	57C10PEST_attp18_4stop1	20140508_32_D5	Mon May 19 03:54:01 EDT 2014	Sample#2008174207162122338	f		20x	Annotator Gen1 MCFO	Aljoscha Nern
R10A11	attP2	57C10PEST_attp18_4stop1	20140508_32_D6	Mon May 19 03:54:01 EDT 2014	Sample#2008174208625934434	f		20x	Annotator Gen1 MCFO	Aljoscha Nern
R10A11	attP2	57C10PEST_attp18_4stop1	20140508_32_D7	Mon May 19 03:54:01 EDT 2014	Sample#2008174209661927522	f		20x	Annotator Gen1 MCFO	Aljoscha Nern
R10A11	attP2	57C10PEST_attp18_4stop1	20140508_32_D8	Mon May 19 03:54:01 EDT 2014	Sample#2008174210609840226	f		20x	Annotator Gen1 MCFO	Aljoscha Nern
R10A11	attP2	57C10PEST_attp8_3stop1	20170303_23_F1	Thu Mar 09 15:22:25 EST 2017	Sample#2379810110445715554	f		20x	Annotator Gen1 MCFO	Gabriella Sterne
R10A11	attP2	57C10PEST_attp8_3stop1	20170303_23_F2	Thu Mar 09 15:22:25 EST 2017	Sample#2379810110584127586	f		20x, 63x	Annotator Gen1 MCFO	Gabriella Sterne
R10A11	attP2	57C10PEST_attp8_3stop1	20170303_23_F3	Thu Mar 09 15:22:25 EST 2017	Sample#2379810110726733922	f		20x	Annotator Gen1 MCFO	Gabriella Sterne
R10A11	attP2	57C10PEST_attp8_3stop1	20170303_23_F4	Thu Mar 09 15:22:25 EST 2017	Sample#2379810110865145954	f		20x, 63x	Annotator Gen1 MCFO	Gabriella Sterne
R10A11	attP2	57C10PEST_attp8_3stop1	20170303_23_F5	Thu Mar 09 15:22:25 EST 2017	Sample#2379810111003557986	f		20x, 63x	Annotator Gen1 MCFO	Gabriella Sterne
R10A11	attP2	57C10PEST_attp8_3stop1	20170303_23_F6	Thu Mar 09 15:22:25 EST 2017	Sample#2379810111146164322	f		20x	Annotator Gen1 MCFO	Gabriella Sterne
R10A11	attP2	57C10PEST_attp8_3stop1	20170303_23_F7	Thu Mar 09 15:22:25 EST 2017	Sample#2379810111284576354	f		20x, 63x	Annotator Gen1 MCFO	Gabriella Sterne
R10A11	attP2	57C10PEST_brp_SNAP_MCFO_X23_0099	20180828_61_C1	Fri Sep 14 14:04:51 EDT 2018	Sample#2580538369247281250	f		40x	Gen1 MCFO (40x)	NA
R10A11	attP2	57C10PEST_brp_SNAP_MCFO_X23_0099	20180828_61_C2	Fri Sep 14 14:04:51 EDT 2018	Sample#2580538369532493922	f		40x	Gen1 MCFO (40x)	NA
R10A11	attP2	57C10PEST_brp_SNAP_MCFO_X23_0099	20180828_61_C3	Fri Sep 14 14:04:51 EDT 2018	Sample#2580538369817706594	f		40x	Gen1 MCFO (40x)	NA
R10A11	attP2	57C10PEST_brp_SNAP_MCFO_X23_0099	20180828_61_C5	Fri Sep 14 14:04:51 EDT 2018	Sample#2580538370102919266	f		40x	Gen1 MCFO (40x)	NA
R10A11	attP2	57C10PEST_brp_SNAP_MCFO_X23_0099	20180828_61_D1	Fri Sep 14 14:04:51 EDT 2018	Sample#2580538370383937634	f		40x	Gen1 MCFO (40x)	NA
R10A12	attP2	57C10PEST_brp_SNAP_MCFO_X23_0099	20180828_61_E1	Fri Sep 14 14:04:51 EDT 2018	Sample#2580538370664956002	f		40x	Gen1 MCFO (40x)	NA
R10A12	attP2	57C10PEST_brp_SNAP_MCFO_X23_0099	20180828_61_E2	Fri Sep 14 14:04:51 EDT 2018	Sample#2580538370950168674	f		40x	Gen1 MCFO (40x)	NA
R10A12	attP2	57C10PEST_brp_SNAP_MCFO_X23_0099	20180828_61_E3	Fri Sep 14 14:04:51 EDT 2018	Sample#2580538371235381346	f		40x	Gen1 MCFO (40x)	NA
R10A12	attP2	57C10PEST_brp_SNAP_MCFO_X23_0099	20180828_61_E4	Fri Sep 14 14:04:51 EDT 2018	Sample#2580538371545759842	f		40x	Gen1 MCFO (40x)	NA
R10A12	attP2	57C10PEST_brp_SNAP_MCFO_X23_0099	20180828_61_E5	Fri Sep 14 14:04:51 EDT 2018	Sample#2580538371835166818	f		40x	Gen1 MCFO (40x)	NA
R10A12	attP2	57C10PEST_brp_SNAP_MCFO_X23_0099	20180828_61_E6	Fri Sep 14 14:04:51 EDT 2018	Sample#2580538372120379490	f		40x	Gen1 MCFO (40x)	NA
R10B01	attP2	57C10PEST_brp_SNAP_MCFO_X23_0099	20181221_63_A1	Tue Jan 22 15:27:03 EST 2019	Sample#2627684577035944034	f		40x	Gen1 MCFO (40x)	NA
R10B01	attP2	57C10PEST_brp_SNAP_MCFO_X23_0099	20190514_62_F1	Wed Jun 05 17:36:41 EDT 2019	Sample#2676262077999349858	f		40x	Gen1 MCFO (40x)	NA
R10B01	attP2	57C10PEST_brp_SNAP_MCFO_X23_0099	20190514_62_F2	Wed Jun 05 17:36:42 EDT 2019	Sample#2676262078439751778	f		40x	Gen1 MCFO (40x)	NA
R10B01	attP2	57C10PEST_brp_SNAP_MCFO_X23_0099	20190514_62_F3	Wed Jun 05 17:36:42 EDT 2019	Sample#2676262078884348002	f		40x	Gen1 MCFO (40x)	NA
R10B01	attP2	57C10PEST_brp_SNAP_MCFO_X23_0099	20190514_62_F4	Wed Jun 05 17:36:42 EDT 2019	Sample#2676262079324749922	f		40x	Gen1 MCFO (40x)	NA
R10B01	attP2	57C10PEST_brp_SNAP_MCFO_X23_0099	20190514_62_F5	Wed Jun 05 17:36:42 EDT 2019	Sample#2676262079769346146	f		40x	Gen1 MCFO (40x)	NA
R10B01	attP2	57C10PEST_brp_SNAP_MCFO_X23_0099	20190514_62_F6	Wed Jun 05 17:36:42 EDT 2019	Sample#2676262080243302498	f		40x	Gen1 MCFO (40x)	NA
R10B01	attP2	pBPhsFlp2_PEST_brp_SNAP_MCFO_0128	20190813_61_C1	Tue Aug 20 17:28:46 EDT 2019	Sample#2703801561078825058	m	13	40x	Gen1 MCFO (40x)	NA
R10B01	attP2	pBPhsFlp2_PEST_brp_SNAP_MCFO_0128	20190813_61_C2	Tue Aug 20 17:28:46 EDT 2019	Sample#2703801561565364322	m	13	40x	Gen1 MCFO (40x)	NA
R10B01	attP2	pBPhsFlp2_PEST_brp_SNAP_MCFO_0128	20190813_61_C3	Tue Aug 20 17:28:46 EDT 2019	Sample#2703801562056097890	m	13	40x	Gen1 MCFO (40x)	NA
R10B01	attP2	pBPhsFlp2_PEST_brp_SNAP_MCFO_0128	20190813_61_C4	Tue Aug 20 17:28:46 EDT 2019	Sample#2703801562546831458	m	13	40x	Gen1 MCFO (40x)	NA
R10B01	attP2	pBPhsFlp2_PEST_brp_SNAP_MCFO_0128	20190813_61_C5	Tue Aug 20 17:28:46 EDT 2019	Sample#2703801562983039074	m	13	40x	Gen1 MCFO (40x)	NA
R10B01	attP2	pBPhsFlp2_PEST_brp_SNAP_MCFO_0128	20190813_61_C7	Tue Aug 20 17:28:46 EDT 2019	Sample#2703801563415052386	m	13	40x	Gen1 MCFO (40x)	NA
R10B01	attP2	pBPhsFlp2_PEST_brp_SNAP_MCFO_0128	20190813_61_C8	Tue Aug 20 17:28:47 EDT 2019	Sample#2703801563855454306	m	13	40x	Gen1 MCFO (40x)	NA
R10B01	attP2	pBPhsFlp2_PEST_brp_SNAP_MCFO_0128	20190813_61_C9	Tue Aug 20 17:28:47 EDT 2019	Sample#2703801564291661922	m	13	40x	Gen1 MCFO (40x)	NA
R10B02	attP2	57C10PEST_brp_SNAP_MCFO_X23_0099	20181116_63_H1	Mon Dec 10 15:09:07 EST 2018	Sample#2612097389082706018	f		40x	Gen1 MCFO (40x)	NA
R10B02	attP2	57C10PEST_brp_SNAP_MCFO_X23_0099	20181116_63_H2	Mon Dec 10 15:09:08 EST 2018	Sample#2612097389674102882	f		40x	Gen1 MCFO (40x)	NA
R10B02	attP2	57C10PEST_brp_SNAP_MCFO_X23_0099	20181116_63_H3	Mon Dec 10 15:09:08 EST 2018	Sample#2612097390261305442	f		40x	Gen1 MCFO (40x)	NA
R10B02	attP2	57C10PEST_brp_SNAP_MCFO_X23_0099	20181116_63_H4	Mon Dec 10 15:09:08 EST 2018	Sample#2612097390844313698	f		40x	Gen1 MCFO (40x)	NA
R10B02	attP2	57C10PEST_brp_SNAP_MCFO_X23_0099	20181116_63_H5	Mon Dec 10 15:09:08 EST 2018	Sample#2612097391427321954	f		40x	Gen1 MCFO (40x)	NA
R10B02	attP2	57C10PEST_brp_SNAP_MCFO_X23_0099	20181116_63_H6	Mon Dec 10 15:09:08 EST 2018	Sample#2612097391976775778	f		40x	Gen1 MCFO (40x)	NA
R10B02	attP2	pBPhsFlp2_PEST_brp_SNAP_MCFO_0128	20191011_62_H1	Fri Oct 25 17:12:30 EDT 2019	Sample#2727715068014755938	m	13	40x	Gen1 MCFO (40x)	NA
R10B02	attP2	pBPhsFlp2_PEST_brp_SNAP_MCFO_0128	20191011_62_H10	Fri Oct 25 17:12:38 EDT 2019	Sample#2727715102135418978	m	13	40x	Gen1 MCFO (40x)	NA
R10B02	attP2	pBPhsFlp2_PEST_brp_SNAP_MCFO_0128	20191011_62_H2	Fri Oct 25 17:12:30 EDT 2019	Sample#2727715068920725602	m	13	40x	Gen1 MCFO (40x)	NA
R10B02	attP2	pBPhsFlp2_PEST_brp_SNAP_MCFO_0128	20191011_62_H3	Fri Oct 25 17:12:31 EDT 2019	Sample#2727715069809918050	m	13	40x	Gen1 MCFO (40x)	NA
R10B02	attP2	pBPhsFlp2_PEST_brp_SNAP_MCFO_0128	20191011_62_H4	Fri Oct 25 17:12:34 EDT 2019	Sample#2727715084406095970	m	13	40x	Gen1 MCFO (40x)	NA
R10B02	attP2	pBPhsFlp2_PEST_brp_SNAP_MCFO_0128	20191011_62_H5	Fri Oct 25 17:12:37 EDT 2019	Sample#2727715097957892194	m	13	40x	Gen1 MCFO (40x)	NA
R10B02	attP2	pBPhsFlp2_PEST_brp_SNAP_MCFO_0128	20191011_62_H6	Fri Oct 25 17:12:38 EDT 2019	Sample#2727715098838696034	m	13	40x	Gen1 MCFO (40x)	NA
R10B02	attP2	pBPhsFlp2_PEST_brp_SNAP_MCFO_0128	20191011_62_H7	Fri Oct 25 17:12:38 EDT 2019	Sample#2727715099664973922	m	13	40x	Gen1 MCFO (40x)	NA
R10B02	attP2	pBPhsFlp2_PEST_brp_SNAP_MCFO_0128	20191011_62_H8	Fri Oct 25 17:12:38 EDT 2019	Sample#2727715100487057506	m	13	40x	Gen1 MCFO (40x)	NA
R10B02	attP2	pBPhsFlp2_PEST_brp_SNAP_MCFO_0128	20191011_62_H9	Fri Oct 25 17:12:38 EDT 2019	Sample#2727715101317529698	m	13	40x	Gen1 MCFO (40x)	NA
R10B03	attP2	57C10PEST_brp_SNAP_MCFO_X23_0099	20181116_63_I1	Wed Jan 02 15:57:33 EST 2019	Sample#2620444494998274146	f		40x	Gen1 MCFO (40x)	NA
R10B03	attP2	57C10PEST_brp_SNAP_MCFO_X23_0099	20181116_63_I2	Wed Jan 02 15:57:33 EST 2019	Sample#2620444495577088098	f		40x	Gen1 MCFO (40x)	NA
R10B03	attP2	57C10PEST_brp_SNAP_MCFO_X23_0099	20181116_63_I3	Wed Jan 02 15:57:33 EST 2019	Sample#2620444496143319138	f		40x	Gen1 MCFO (40x)	NA
R10B03	attP2	57C10PEST_brp_SNAP_MCFO_X23_0099	20181116_63_I4	Wed Jan 02 15:57:33 EST 2019	Sample#2620444496705355874	f		40x	Gen1 MCFO (40x)	NA
R10B03	attP2	57C10PEST_brp_SNAP_MCFO_X23_0099	20181116_63_I5	Wed Jan 02 15:57:33 EST 2019	Sample#2620444497384833122	f		40x	Gen1 MCFO (40x)	NA
R10B03	attP2	57C10PEST_brp_SNAP_MCFO_X23_0099	20181116_63_I6	Wed Jan 02 15:57:33 EST 2019	Sample#2620444497972035682	f		40x	Gen1 MCFO (40x)	NA
R10B03	attP2	57C10PEST_brp_SNAP_MCFO_X23_0099	20181116_63_J1	Tue Dec 24 10:16:50 EST 2019	Sample#2749368833838940258	f		40x	Gen1 MCFO (40x)	NA
R10B07	attP2	57C10PEST_attp18_4stop1	20140509_21_D1	Tue May 20 13:59:53 EDT 2014	Sample#2008689069717979234	f		20x	Annotator Gen1 MCFO	Aljoscha Nern
R10B07	attP2	57C10PEST_attp18_4stop1	20140509_21_D2	Tue May 20 13:59:54 EDT 2014	Sample#2008689070896578658	f		20x	Annotator Gen1 MCFO	Aljoscha Nern
R10B07	attP2	57C10PEST_attp18_4stop1	20140509_21_D3	Tue May 20 13:59:54 EDT 2014	Sample#2008689071966126178	f		20x	Annotator Gen1 MCFO	Aljoscha Nern
R10B07	attP2	57C10PEST_attp18_4stop1	20140509_21_D4	Tue May 20 13:59:54 EDT 2014	Sample#2008689072926621794	f		20x	Annotator Gen1 MCFO	Aljoscha Nern
R10B07	attP2	57C10PEST_attp18_4stop1	20140509_21_D5	Tue May 20 13:59:54 EDT 2014	Sample#2008689073958420578	f		20x	Annotator Gen1 MCFO	Aljoscha Nern
R10B07	attP2	57C10PEST_attp18_4stop1	20140509_21_D6	Tue May 20 13:59:55 EDT 2014	Sample#2008689075011190882	f		20x	Annotator Gen1 MCFO	Aljoscha Nern
R10B07	attP2	57C10PEST_brp_SNAP_MCFO_X23_0099	20181121_63_D1	Mon Dec 17 15:08:53 EST 2018	Sample#2614634045002219618	f		40x	Gen1 MCFO (40x)	NA
R10B07	attP2	57C10PEST_brp_SNAP_MCFO_X23_0099	20181121_63_D2	Mon Dec 17 15:08:54 EST 2018	Sample#2614634045555867746	f		40x	Gen1 MCFO (40x)	NA
R10B07	attP2	57C10PEST_brp_SNAP_MCFO_X23_0099	20181121_63_D3	Mon Dec 17 15:08:54 EST 2018	Sample#2614634046105321570	f		40x	Gen1 MCFO (40x)	NA
R10B07	attP2	57C10PEST_brp_SNAP_MCFO_X23_0099	20181121_63_D4	Mon Dec 17 15:08:54 EST 2018	Sample#2614634046650581090	f		40x	Gen1 MCFO (40x)	NA
R10B07	attP2	57C10PEST_brp_SNAP_MCFO_X23_0099	20181121_63_D5	Mon Dec 17 15:08:54 EST 2018	Sample#2614634047200034914	f		40x	Gen1 MCFO (40x)	NA
R10B07	attP2	57C10PEST_brp_SNAP_MCFO_X23_0099	20181121_63_D6	Mon Dec 17 15:08:54 EST 2018	Sample#2614634047749488738	f		40x	Gen1 MCFO (40x)	NA
R10B07	attP2	pBPhsFlp2_PEST_brp_SNAP_MCFO_0128	20191011_62_I1	Fri Oct 25 17:12:39 EDT 2019	Sample#2727715102961696866	m	13	40x	Gen1 MCFO (40x)	NA
R10B07	attP2	pBPhsFlp2_PEST_brp_SNAP_MCFO_0128	20191011_62_I10	Fri Oct 25 17:12:40 EDT 2019	Sample#2727715110612107362	m	13	40x	Gen1 MCFO (40x)	NA
R10B07	attP2	pBPhsFlp2_PEST_brp_SNAP_MCFO_0128	20191011_62_I2	Fri Oct 25 17:12:39 EDT 2019	Sample#2727715103846695010	m	13	40x	Gen1 MCFO (40x)	NA
R10B07	attP2	pBPhsFlp2_PEST_brp_SNAP_MCFO_0128	20191011_62_I3	Fri Oct 25 17:12:39 EDT 2019	Sample#2727715104735887458	m	13	40x	Gen1 MCFO (40x)	NA
R10B07	attP2	pBPhsFlp2_PEST_brp_SNAP_MCFO_0128	20191011_62_I4	Fri Oct 25 17:12:39 EDT 2019	Sample#2727715105629274210	m	13	40x	Gen1 MCFO (40x)	NA
R10B07	attP2	pBPhsFlp2_PEST_brp_SNAP_MCFO_0128	20191011_62_I5	Fri Oct 25 17:12:39 EDT 2019	Sample#2727715106447163490	m	13	40x	Gen1 MCFO (40x)	NA
R10B07	attP2	pBPhsFlp2_PEST_brp_SNAP_MCFO_0128	20191011_62_I6	Fri Oct 25 17:12:40 EDT 2019	Sample#2727715107269247074	m	13	40x	Gen1 MCFO (40x)	NA
R10B07	attP2	pBPhsFlp2_PEST_brp_SNAP_MCFO_0128	20191011_62_I7	Fri Oct 25 17:12:40 EDT 2019	Sample#2727715108087136354	m	13	40x	Gen1 MCFO (40x)	NA
R10B07	attP2	pBPhsFlp2_PEST_brp_SNAP_MCFO_0128	20191011_62_I8	Fri Oct 25 17:12:40 EDT 2019	Sample#2727715108913414242	m	13	40x	Gen1 MCFO (40x)	NA
R10B07	attP2	pBPhsFlp2_PEST_brp_SNAP_MCFO_0128	20191011_62_I9	Fri Oct 25 17:12:40 EDT 2019	Sample#2727715109790023778	m	13	40x	Gen1 MCFO (40x)	NA
R10B09	attP2	57C10PEST_brp_SNAP_MCFO_X23_0099	20181121_63_E1	Mon Dec 17 15:08:54 EST 2018	Sample#2614634048298942562	f		40x	Gen1 MCFO (40x)	NA
R10B09	attP2	57C10PEST_brp_SNAP_MCFO_X23_0099	20181121_63_E2	Mon Dec 17 15:08:54 EST 2018	Sample#2614634048848396386	f		40x	Gen1 MCFO (40x)	NA
R10B09	attP2	57C10PEST_brp_SNAP_MCFO_X23_0099	20181121_63_E3	Mon Dec 17 15:08:54 EST 2018	Sample#2614634049397850210	f		40x	Gen1 MCFO (40x)	NA
R10B09	attP2	57C10PEST_brp_SNAP_MCFO_X23_0099	20181121_63_E4	Mon Dec 17 15:08:55 EST 2018	Sample#2614634049947304034	f		40x	Gen1 MCFO (40x)	NA
R10B09	attP2	57C10PEST_brp_SNAP_MCFO_X23_0099	20181121_63_E5	Mon Dec 17 15:08:55 EST 2018	Sample#2614634050500952162	f		40x	Gen1 MCFO (40x)	NA
R10B09	attP2	57C10PEST_brp_SNAP_MCFO_X23_0099	20181121_63_E6	Mon Dec 17 15:08:55 EST 2018	Sample#2614634051058794594	f		40x	Gen1 MCFO (40x)	NA
R10B09	attP2	pBPhsFlp2_PEST_brp_SNAP_MCFO_0128	20191011_62_J1	Fri Oct 25 17:12:41 EDT 2019	Sample#2727715111438385250	m	13	40x	Gen1 MCFO (40x)	NA
R10B09	attP2	pBPhsFlp2_PEST_brp_SNAP_MCFO_0128	20191011_62_J10	Fri Oct 25 17:12:42 EDT 2019	Sample#2727715119055241314	m	13	40x	Gen1 MCFO (40x)	NA
R10B09	attP2	pBPhsFlp2_PEST_brp_SNAP_MCFO_0128	20191011_62_J2	Fri Oct 25 17:12:41 EDT 2019	Sample#2727715112331772002	m	13	40x	Gen1 MCFO (40x)	NA
R10B09	attP2	pBPhsFlp2_PEST_brp_SNAP_MCFO_0128	20191011_62_J3	Fri Oct 25 17:12:41 EDT 2019	Sample#2727715113220964450	m	13	40x	Gen1 MCFO (40x)	NA
R10B09	attP2	pBPhsFlp2_PEST_brp_SNAP_MCFO_0128	20191011_62_J4	Fri Oct 25 17:12:41 EDT 2019	Sample#2727715114122739810	m	13	40x	Gen1 MCFO (40x)	NA
R10B09	attP2	pBPhsFlp2_PEST_brp_SNAP_MCFO_0128	20191011_62_J5	Fri Oct 25 17:12:41 EDT 2019	Sample#2727715114949017698	m	13	40x	Gen1 MCFO (40x)	NA
R10B09	attP2	pBPhsFlp2_PEST_brp_SNAP_MCFO_0128	20191011_62_J6	Fri Oct 25 17:12:42 EDT 2019	Sample#2727715115779489890	m	13	40x	Gen1 MCFO (40x)	NA
R10B09	attP2	pBPhsFlp2_PEST_brp_SNAP_MCFO_0128	20191011_62_J7	Fri Oct 25 17:12:42 EDT 2019	Sample#2727715116597379170	m	13	40x	Gen1 MCFO (40x)	NA
R10B09	attP2	pBPhsFlp2_PEST_brp_SNAP_MCFO_0128	20191011_62_J8	Fri Oct 25 17:12:42 EDT 2019	Sample#2727715117423657058	m	13	40x	Gen1 MCFO (40x)	NA
R10B09	attP2	pBPhsFlp2_PEST_brp_SNAP_MCFO_0128	20191011_62_J9	Fri Oct 25 17:12:42 EDT 2019	Sample#2727715118237352034	m	13	40x	Gen1 MCFO (40x)	NA
R10B11	attP2	57C10PEST_attp8_3stop1	20161222_28_B1	Fri Dec 30 13:07:35 EST 2016	Sample#2354771415653154914	f		20x, 63x	Annotator Gen1 MCFO	Gabriella Sterne
R10B11	attP2	57C10PEST_attp8_3stop1	20161222_28_B3	Fri Dec 30 13:07:35 EST 2016	Sample#2354771415929978978	f		20x, 63x	Annotator Gen1 MCFO	Gabriella Sterne
R10B11	attP2	57C10wt_attp8_3stop1	20130605_1_A1	Thu Apr 24 20:09:54 EDT 2014	Sample#1999360099977527394	f		20x	Annotator Gen1 MCFO	Tanya Wolff
R10B11	attP2	57C10wt_attp8_3stop1	20130605_1_A2	Thu Apr 24 20:09:54 EDT 2014	Sample#1999360100967383138	f		20x	Annotator Gen1 MCFO	Tanya Wolff
R10B11	attP2	57C10wt_attp8_3stop1	20130605_1_A3	Thu Apr 24 20:09:54 EDT 2014	Sample#1999360101974016098	f		20x	Annotator Gen1 MCFO	Tanya Wolff
R10B11	attP2	57C10wt_attp8_3stop1	20130605_1_A4	Thu Apr 24 20:09:54 EDT 2014	Sample#1999360102796099682	f		20x	Annotator Gen1 MCFO	Tanya Wolff
R10B11	attP2	57C10wt_attp8_3stop1	20130605_1_A5	Thu Apr 24 20:09:54 EDT 2014	Sample#1999360103504937058	f		20x	Annotator Gen1 MCFO	Tanya Wolff
R10B11	attP2	57C10wt_attp8_3stop1	20130605_1_A6	Thu Apr 24 20:09:55 EDT 2014	Sample#1999360104159248482	f		20x	Annotator Gen1 MCFO	Tanya Wolff
R10B11	attP2	57C10wt_attp8_3stop1	20130605_1_B1	Thu Apr 24 20:09:55 EDT 2014	Sample#1999360104935194722	f		20x	Annotator Gen1 MCFO	Tanya Wolff
R10B11	attP2	57C10wt_attp8_3stop1	20130605_1_B2	Thu Apr 24 20:09:55 EDT 2014	Sample#1999360105665003618	f		20x	Annotator Gen1 MCFO	Tanya Wolff
R10B11	attP2	57C10wt_attp8_3stop1	20130605_1_B3	Thu Apr 24 20:09:55 EDT 2014	Sample#1999360106361258082	f		20x	Annotator Gen1 MCFO	Tanya Wolff
R10B11	attP2	57C10wt_attp8_3stop1	20130612_1_A4	Sun Jul 06 14:13:18 EDT 2014	Sample#2025724674268201058	f		20x	Annotator Gen1 MCFO	Tanya Wolff
R10B11	attP2	57C10wt_attp8_3stop1	20130612_1_A5	Sun Jul 06 14:13:18 EDT 2014	Sample#2025724675560046690	f		20x	Annotator Gen1 MCFO	Tanya Wolff
R10B11	attP2	57C10wt_attp8_3stop1	20130612_1_A6	Sun Jul 06 14:13:19 EDT 2014	Sample#2025724676994498658	f		20x	Annotator Gen1 MCFO	Tanya Wolff
R10B11	attP2	57C10wt_attp8_3stop1	20130612_1_B1	Sun Jul 06 14:13:19 EDT 2014	Sample#2025724678437339234	f		20x	Annotator Gen1 MCFO	Tanya Wolff
R10B11	attP2	57C10PEST_brp_SNAP_MCFO_X23_0099	20180828_61_F1	Fri Sep 14 14:04:52 EDT 2018	Sample#2580538372405592162	f		40x	Gen1 MCFO (40x)	NA
R10B11	attP2	57C10PEST_brp_SNAP_MCFO_X23_0099	20180828_61_F2	Fri Sep 14 14:04:52 EDT 2018	Sample#2580538372690804834	f		40x	Gen1 MCFO (40x)	NA
R10B11	attP2	57C10PEST_brp_SNAP_MCFO_X23_0099	20180828_61_F3	Fri Sep 14 14:04:52 EDT 2018	Sample#2580538372976017506	f		40x	Gen1 MCFO (40x)	NA
R10B11	attP2	57C10PEST_brp_SNAP_MCFO_X23_0099	20180828_61_F4	Fri Sep 14 14:04:52 EDT 2018	Sample#2580538373265424482	f		40x	Gen1 MCFO (40x)	NA
R10B11	attP2	57C10PEST_brp_SNAP_MCFO_X23_0099	20180828_61_F5	Fri Sep 14 14:04:52 EDT 2018	Sample#2580538373550637154	f		40x	Gen1 MCFO (40x)	NA
R10B11	attP2	57C10PEST_brp_SNAP_MCFO_X23_0099	20180828_61_F6	Fri Sep 14 14:04:52 EDT 2018	Sample#2580538373865209954	f		40x	Gen1 MCFO (40x)	NA
R10B12	attP2	57C10PEST_brp_SNAP_MCFO_X23_0099	20181121_63_F1	Mon Dec 17 15:08:55 EST 2018	Sample#2614634051604054114	f		40x	Gen1 MCFO (40x)	NA
R10B12	attP2	57C10PEST_brp_SNAP_MCFO_X23_0099	20181121_63_F2	Mon Dec 17 15:08:55 EST 2018	Sample#2614634052153507938	f		40x	Gen1 MCFO (40x)	NA
R10B12	attP2	57C10PEST_brp_SNAP_MCFO_X23_0099	20181121_63_F3	Mon Dec 17 15:08:55 EST 2018	Sample#2614634052698767458	f		40x	Gen1 MCFO (40x)	NA
R10B12	attP2	57C10PEST_brp_SNAP_MCFO_X23_0099	20181121_63_F4	Mon Dec 17 15:08:55 EST 2018	Sample#2614634053260804194	f		40x	Gen1 MCFO (40x)	NA
R10B12	attP2	57C10PEST_brp_SNAP_MCFO_X23_0099	20181121_63_F5	Mon Dec 17 15:08:55 EST 2018	Sample#2614634053860589666	f		40x	Gen1 MCFO (40x)	NA
R10B12	attP2	57C10PEST_brp_SNAP_MCFO_X23_0099	20181121_63_F6	Mon Dec 17 15:08:56 EST 2018	Sample#2614634054418432098	f		40x	Gen1 MCFO (40x)	NA
R10B12	attP2	pBPhsFlp2_PEST_brp_SNAP_MCFO_0128	20191022_62_J1	Wed Nov 06 18:17:22 EST 2019	Sample#2732095144445608034	m	40	40x	Gen1 MCFO (40x)	NA
R10B12	attP2	pBPhsFlp2_PEST_brp_SNAP_MCFO_0128	20191022_62_J2	Wed Nov 06 18:17:22 EST 2019	Sample#2732095145368354914	m	40	40x	Gen1 MCFO (40x)	NA
R10B12	attP2	pBPhsFlp2_PEST_brp_SNAP_MCFO_0128	20191022_62_J3	Wed Nov 06 18:17:22 EST 2019	Sample#2732095146295296098	m	40	40x	Gen1 MCFO (40x)	NA
R10B12	attP2	pBPhsFlp2_PEST_brp_SNAP_MCFO_0128	20191022_62_J4	Wed Nov 06 18:17:22 EST 2019	Sample#2732095147146739810	m	40	40x	Gen1 MCFO (40x)	NA
R10B12	attP2	pBPhsFlp2_PEST_brp_SNAP_MCFO_0128	20191022_62_J5	Wed Nov 06 18:17:23 EST 2019	Sample#2732095148006572130	m	40	40x	Gen1 MCFO (40x)	NA
R10B12	attP2	pBPhsFlp2_PEST_brp_SNAP_MCFO_0128	20191022_62_J6	Wed Nov 06 18:17:23 EST 2019	Sample#2732095148858015842	m	40	40x	Gen1 MCFO (40x)	NA
R10B12	attP2	pBPhsFlp2_PEST_brp_SNAP_MCFO_0128	20191022_62_J7	Fri Nov 15 11:56:22 EST 2019	Sample#2735260752981000290	m	40	40x	Gen1 MCFO (40x)	NA
R10C01	attP2	57C10L_brp_SNAP_MCFO_X23_0117	20190514_64_H1	Fri May 24 12:10:36 EDT 2019	Sample#2671831360598966370	f		40x	Gen1 MCFO (40x)	NA
R10C01	attP2	57C10L_brp_SNAP_MCFO_X23_0117	20190514_64_H4	Fri May 24 12:10:36 EDT 2019	Sample#2671831360997425250	f		40x	Gen1 MCFO (40x)	NA
R10C01	attP2	57C10L_brp_SNAP_MCFO_X23_0117	20190514_64_H5	Fri May 24 12:10:36 EDT 2019	Sample#2671831361421049954	f		40x	Gen1 MCFO (40x)	NA
R10C01	attP2	57C10PEST_brp_SNAP_MCFO_X23_0099	20181121_61_H3	Mon Dec 10 13:34:33 EST 2018	Sample#2612073587380584546	f		40x	Gen1 MCFO (40x)	NA
R10C02	attP2	57C10PEST_brp_SNAP_MCFO_X23_0099	20181109_62_B1	Tue Nov 27 16:53:37 EST 2018	Sample#2607412642452602978	f		40x	Gen1 MCFO (40x)	NA
R10C02	attP2	57C10PEST_brp_SNAP_MCFO_X23_0099	20181109_62_B2	Tue Nov 27 16:53:37 EST 2018	Sample#2607412643035611234	f		40x	Gen1 MCFO (40x)	NA
R10C02	attP2	57C10PEST_brp_SNAP_MCFO_X23_0099	20181109_62_B3	Tue Nov 27 16:53:37 EST 2018	Sample#2607412644155490402	f		40x	Gen1 MCFO (40x)	NA
R10C02	attP2	57C10PEST_brp_SNAP_MCFO_X23_0099	20181109_62_B5	Tue Nov 27 16:53:37 EST 2018	Sample#2607412644738498658	f		40x	Gen1 MCFO (40x)	NA
R10C02	attP2	57C10PEST_brp_SNAP_MCFO_X23_0099	20181109_62_B6	Tue Nov 27 16:54:50 EST 2018	Sample#2607412949509210210	f		40x	Gen1 MCFO (40x)	NA
R10C02	attP2	57C10PEST_brp_SNAP_MCFO_X23_0099	20181109_62_C1	Tue Nov 27 16:54:50 EST 2018	Sample#2607412950318710882	f		40x	Gen1 MCFO (40x)	NA
R10C06	attP2	57C10PEST_brp_SNAP_MCFO_X23_0099	20181121_63_G1	Mon Dec 17 15:08:56 EST 2018	Sample#2614634054980468834	f		40x	Gen1 MCFO (40x)	NA
R10C06	attP2	57C10PEST_brp_SNAP_MCFO_X23_0099	20181121_63_G2	Mon Dec 17 15:08:56 EST 2018	Sample#2614634055538311266	f		40x	Gen1 MCFO (40x)	NA
R10C06	attP2	57C10PEST_brp_SNAP_MCFO_X23_0099	20181121_63_G3	Mon Dec 17 15:08:56 EST 2018	Sample#2614634056087765090	f		40x	Gen1 MCFO (40x)	NA
R10C06	attP2	57C10PEST_brp_SNAP_MCFO_X23_0099	20181121_63_G4	Mon Dec 17 15:08:56 EST 2018	Sample#2614634056670773346	f		40x	Gen1 MCFO (40x)	NA
R10C06	attP2	57C10PEST_brp_SNAP_MCFO_X23_0099	20181121_63_G5	Mon Dec 17 15:08:56 EST 2018	Sample#2614634057262170210	f		40x	Gen1 MCFO (40x)	NA
R10C06	attP2	57C10PEST_brp_SNAP_MCFO_X23_0099	20181121_63_G6	Mon Dec 17 15:08:56 EST 2018	Sample#2614634057824206946	f		40x	Gen1 MCFO (40x)	NA
R10C06	attP2	pBPhsFlp2_PEST_brp_SNAP_MCFO_0128	20191022_62_K2	Fri Nov 15 11:56:22 EST 2019	Sample#2735260753870192738	m	40	40x	Gen1 MCFO (40x)	NA
R10C06	attP2	pBPhsFlp2_PEST_brp_SNAP_MCFO_0128	20191022_62_K3	Fri Nov 15 11:56:22 EST 2019	Sample#2735260754851659874	m	40	40x	Gen1 MCFO (40x)	NA
R10C06	attP2	pBPhsFlp2_PEST_brp_SNAP_MCFO_0128	20191022_62_K4	Fri Nov 15 11:56:22 EST 2019	Sample#2735260755728269410	m	40	40x	Gen1 MCFO (40x)	NA
R10C06	attP2	pBPhsFlp2_PEST_brp_SNAP_MCFO_0128	20191022_62_K5	Fri Nov 15 11:56:23 EST 2019	Sample#2735260756600684642	m	40	40x	Gen1 MCFO (40x)	NA
R10C06	attP2	pBPhsFlp2_PEST_brp_SNAP_MCFO_0128	20191022_62_K7	Fri Nov 15 11:56:23 EST 2019	Sample#2735260757464711266	m	40	40x	Gen1 MCFO (40x)	NA
R10C07	attP2	57C10PEST_brp_SNAP_MCFO_X23_0099	20180828_61_G1	Fri Sep 14 14:04:52 EDT 2018	Sample#2580538374167199842	f		40x	Gen1 MCFO (40x)	NA
R10C07	attP2	57C10PEST_brp_SNAP_MCFO_X23_0099	20180828_61_G2	Fri Sep 14 14:04:52 EDT 2018	Sample#2580538374456606818	f		40x	Gen1 MCFO (40x)	NA
R10C07	attP2	57C10PEST_brp_SNAP_MCFO_X23_0099	20180828_61_G3	Fri Sep 14 14:04:52 EDT 2018	Sample#2580538374741819490	f		40x	Gen1 MCFO (40x)	NA
R10C07	attP2	57C10PEST_brp_SNAP_MCFO_X23_0099	20180828_61_G4	Fri Sep 14 14:04:52 EDT 2018	Sample#2580538375027032162	f		40x	Gen1 MCFO (40x)	NA
R10C07	attP2	57C10PEST_brp_SNAP_MCFO_X23_0099	20180828_61_G5	Fri Sep 14 14:04:52 EDT 2018	Sample#2580538375316439138	f		40x	Gen1 MCFO (40x)	NA
R10C07	attP2	57C10PEST_brp_SNAP_MCFO_X23_0099	20180828_61_G6	Fri Sep 14 14:04:52 EDT 2018	Sample#2580538375605846114	f		40x	Gen1 MCFO (40x)	NA
R10D07	attP2	57C10wt_attp8_3stop1	20130605_1_B4	Thu Apr 24 20:09:55 EDT 2014	Sample#1999360107103649890	f		20x	Annotator Gen1 MCFO	Tanya Wolff
R10D07	attP2	57C10wt_attp8_3stop1	20130605_1_B5	Thu Apr 24 20:09:56 EDT 2014	Sample#1999360107871207522	f		20x	Annotator Gen1 MCFO	Tanya Wolff
R10D07	attP2	57C10wt_attp8_3stop1	20130605_1_B6	Thu Apr 24 20:09:56 EDT 2014	Sample#1999360108500353122	f		20x	Annotator Gen1 MCFO	Tanya Wolff
R10D07	attP2	57C10wt_attp8_3stop1	20130605_1_C1	Thu Apr 24 20:09:56 EDT 2014	Sample#1999360109150470242	f		20x	Annotator Gen1 MCFO	Tanya Wolff
R10D07	attP2	57C10wt_attp8_3stop1	20130605_1_C2	Thu Apr 24 20:09:56 EDT 2014	Sample#1999360109821558882	f		20x	Annotator Gen1 MCFO	Tanya Wolff
R10D07	attP2	57C10wt_attp8_3stop1	20130605_1_C3	Thu Apr 24 20:09:56 EDT 2014	Sample#1999360110538784866	f		20x	Annotator Gen1 MCFO	Tanya Wolff
R10D07	attP2	57C10wt_attp8_3stop1	20130605_1_C4	Thu Apr 24 20:09:56 EDT 2014	Sample#1999360111251816546	f		20x	Annotator Gen1 MCFO	Tanya Wolff
R10D07	attP2	57C10wt_attp8_3stop1	20130605_1_C5	Thu Apr 24 20:09:56 EDT 2014	Sample#1999360111872573538	f		20x	Annotator Gen1 MCFO	Tanya Wolff
R10D07	attP2	57C10wt_attp8_3stop1	20130605_1_C6	Thu Apr 24 20:09:57 EDT 2014	Sample#1999360112577216610	f		20x	Annotator Gen1 MCFO	Tanya Wolff
R10D07	attP2	57C10wt_attp8_3stop1	20130605_1_D1	Thu Apr 24 20:09:57 EDT 2014	Sample#1999360113260888162	f		20x	Annotator Gen1 MCFO	Tanya Wolff
R10D10	attP2	57C10PEST_brp_SNAP_MCFO_X23_0099	20181121_63_H1	Mon Dec 17 15:08:57 EST 2018	Sample#2614634058369466466	f		40x	Gen1 MCFO (40x)	NA
R10D10	attP2	57C10PEST_brp_SNAP_MCFO_X23_0099	20181121_63_H2	Mon Dec 17 15:08:57 EST 2018	Sample#2614634058994417762	f		40x	Gen1 MCFO (40x)	NA
R10D10	attP2	57C10PEST_brp_SNAP_MCFO_X23_0099	20181121_63_H3	Mon Dec 17 15:08:57 EST 2018	Sample#2614634059531288674	f		40x	Gen1 MCFO (40x)	NA
R10D10	attP2	57C10PEST_brp_SNAP_MCFO_X23_0099	20181121_63_H4	Mon Dec 17 15:08:57 EST 2018	Sample#2614634060068159586	f		40x	Gen1 MCFO (40x)	NA
R10D10	attP2	57C10PEST_brp_SNAP_MCFO_X23_0099	20181121_63_H5	Mon Dec 17 15:08:57 EST 2018	Sample#2614634060621807714	f		40x	Gen1 MCFO (40x)	NA
R10D10	attP2	57C10PEST_brp_SNAP_MCFO_X23_0099	20181121_63_H6	Mon Dec 17 15:08:57 EST 2018	Sample#2614634061175455842	f		40x	Gen1 MCFO (40x)	NA
R10D10	attP2	pBPhsFlp2_PEST_brp_SNAP_MCFO_0128	20191011_62_K1	Fri Oct 25 17:12:43 EDT 2019	Sample#2727715119873130594	m	13	40x	Gen1 MCFO (40x)	NA
R10D10	attP2	pBPhsFlp2_PEST_brp_SNAP_MCFO_0128	20191011_62_K10	Fri Oct 25 17:12:44 EDT 2019	Sample#2727715127586455650	m	13	40x	Gen1 MCFO (40x)	NA
R10D10	attP2	pBPhsFlp2_PEST_brp_SNAP_MCFO_0128	20191011_62_K2	Fri Oct 25 17:12:43 EDT 2019	Sample#2727715120762323042	m	13	40x	Gen1 MCFO (40x)	NA
R10D10	attP2	pBPhsFlp2_PEST_brp_SNAP_MCFO_0128	20191011_62_K3	Fri Oct 25 17:12:43 EDT 2019	Sample#2727715121651515490	m	13	40x	Gen1 MCFO (40x)	NA
R10D10	attP2	pBPhsFlp2_PEST_brp_SNAP_MCFO_0128	20191011_62_K4	Fri Oct 25 17:12:43 EDT 2019	Sample#2727715122532319330	m	13	40x	Gen1 MCFO (40x)	NA
R10D10	attP2	pBPhsFlp2_PEST_brp_SNAP_MCFO_0128	20191011_62_K5	Fri Oct 25 17:12:43 EDT 2019	Sample#2727715123400540258	m	13	40x	Gen1 MCFO (40x)	NA
R10D10	attP2	pBPhsFlp2_PEST_brp_SNAP_MCFO_0128	20191011_62_K6	Fri Oct 25 17:12:44 EDT 2019	Sample#2727715124281344098	m	13	40x	Gen1 MCFO (40x)	NA
R10D10	attP2	pBPhsFlp2_PEST_brp_SNAP_MCFO_0128	20191011_62_K7	Fri Oct 25 17:12:44 EDT 2019	Sample#2727715125107621986	m	13	40x	Gen1 MCFO (40x)	NA
R10D10	attP2	pBPhsFlp2_PEST_brp_SNAP_MCFO_0128	20191011_62_K8	Fri Oct 25 17:12:44 EDT 2019	Sample#2727715125933899874	m	13	40x	Gen1 MCFO (40x)	NA
R10D10	attP2	pBPhsFlp2_PEST_brp_SNAP_MCFO_0128	20191011_62_K9	Fri Oct 25 17:12:44 EDT 2019	Sample#2727715126760177762	m	13	40x	Gen1 MCFO (40x)	NA
R10E02	attP2	57C10PEST_attp18_4stop1	20170526_19_A1	Wed May 31 16:22:49 EDT 2017	Sample#2409888406453616738	f		20x	Annotator Gen1 MCFO	Jens Goldammer
R10E02	attP2	57C10PEST_attp18_4stop1	20170526_19_A3	Wed May 31 16:22:49 EDT 2017	Sample#2409888406805938274	f		20x	Annotator Gen1 MCFO	Jens Goldammer
R10E02	attP2	57C10PEST_attp18_4stop1	20170526_19_A5	Wed May 31 16:22:49 EDT 2017	Sample#2409888407124705378	f		20x	Annotator Gen1 MCFO	Jens Goldammer
R10E02	attP2	57C10PEST_attp18_4stop1	20170526_19_B1	Wed May 31 16:22:49 EDT 2017	Sample#2409888407774822498	f		20x	Annotator Gen1 MCFO	Jens Goldammer
R10E02	attP2	57C10PEST_attp18_4stop1	20170526_19_B3	Wed May 31 16:22:50 EDT 2017	Sample#2409888408097783906	f		20x	Annotator Gen1 MCFO	Jens Goldammer
R10E02	attP2	57C10PEST_attp18_4stop1	20170526_19_B7	Wed May 31 16:22:50 EDT 2017	Sample#2409888408739512418	f		20x	Annotator Gen1 MCFO	Jens Goldammer
R10E02	attP2	57C10PEST_attp18_4stop1	20170526_19_B8	Wed May 31 16:22:50 EDT 2017	Sample#2409888408898895970	f		20x	Annotator Gen1 MCFO	Jens Goldammer
R10E03	attP2	57C10PEST_attp18_4stop1	20170217_26_C1	Tue Feb 28 11:58:45 EST 2017	Sample#2376497368456495202	f	15	20x	Annotator Gen1 MCFO	Jens Goldammer
R10E03	attP2	57C10PEST_attp18_4stop1	20170217_26_C2	Tue Feb 28 11:58:45 EST 2017	Sample#2376497368628461666	f	15	20x	Annotator Gen1 MCFO	Jens Goldammer
R10E03	attP2	57C10PEST_attp18_4stop1	20170217_26_C3	Tue Feb 28 11:58:45 EST 2017	Sample#2376497368800428130	f	15	20x	Annotator Gen1 MCFO	Jens Goldammer
R10E03	attP2	57C10PEST_attp18_4stop1	20170217_26_C4	Tue Feb 28 11:58:45 EST 2017	Sample#2376497368972394594	f	15	20x	Annotator Gen1 MCFO	Jens Goldammer
R10E03	attP2	57C10PEST_attp18_4stop1	20170217_26_C5	Tue Feb 28 11:58:45 EST 2017	Sample#2376497369144361058	f	15	20x	Annotator Gen1 MCFO	Jens Goldammer
R10E03	attP2	57C10PEST_attp18_4stop1	20170217_26_C6	Tue Feb 28 11:58:46 EST 2017	Sample#2376497369320521826	f	15	20x	Annotator Gen1 MCFO	Jens Goldammer
R10E03	attP2	57C10PEST_attp18_4stop1	20170217_26_C7	Tue Feb 28 11:58:46 EST 2017	Sample#2376497369492488290	f	15	20x	Annotator Gen1 MCFO	Jens Goldammer
R10E03	attP2	57C10PEST_attp18_4stop1	20170217_26_C8	Tue Feb 28 11:58:46 EST 2017	Sample#2376497369664454754	f	15	20x	Annotator Gen1 MCFO	Jens Goldammer
R10E03	attP2	57C10PEST_attp18_4stop1	20170217_26_D1	Tue Feb 28 11:58:46 EST 2017	Sample#2376497369836421218	f	15	20x	Annotator Gen1 MCFO	Jens Goldammer
R10E03	attP2	57C10PEST_brp_SNAP_MCFO_X23_0099	20181109_62_D1	Tue Nov 27 16:54:50 EST 2018	Sample#2607412950947856482	f		40x	Gen1 MCFO (40x)	NA
R10E03	attP2	57C10PEST_brp_SNAP_MCFO_X23_0099	20181109_62_D2	Tue Nov 27 16:54:51 EST 2018	Sample#2607412951551836258	f		40x	Gen1 MCFO (40x)	NA
R10E03	attP2	57C10PEST_brp_SNAP_MCFO_X23_0099	20181109_62_D3	Tue Nov 27 16:54:51 EST 2018	Sample#2607412952646549602	f		40x	Gen1 MCFO (40x)	NA
R10E03	attP2	57C10PEST_brp_SNAP_MCFO_X23_0099	20181109_62_D4	Tue Nov 27 16:54:51 EST 2018	Sample#2607412953271500898	f		40x	Gen1 MCFO (40x)	NA
R10E03	attP2	57C10PEST_brp_SNAP_MCFO_X23_0099	20181109_62_D5	Tue Nov 27 16:54:51 EST 2018	Sample#2607412953850314850	f		40x	Gen1 MCFO (40x)	NA
R10E03	attP2	57C10PEST_brp_SNAP_MCFO_X23_0099	20181109_62_D6	Tue Nov 27 16:54:51 EST 2018	Sample#2607412954450100322	f		40x	Gen1 MCFO (40x)	NA
R10E03	attP2	57C10PEST_brp_SNAP_MCFO_X23_0099	20181109_62_E1	Tue Nov 27 16:54:57 EST 2018	Sample#2607412978772869218	f		40x	Gen1 MCFO (40x)	NA
R10E04	attP2	57C10PEST_brp_SNAP_MCFO_X23_0099	20181121_61_I1	Mon Dec 10 13:34:33 EST 2018	Sample#2612073587988758626	f		40x	Gen1 MCFO (40x)	NA
R10E04	attP2	57C10PEST_brp_SNAP_MCFO_X23_0099	20181121_61_I2	Mon Dec 10 13:34:33 EST 2018	Sample#2612073588563378274	f		40x	Gen1 MCFO (40x)	NA
R10E04	attP2	57C10PEST_brp_SNAP_MCFO_X23_0099	20181121_61_I3	Mon Dec 10 13:34:33 EST 2018	Sample#2612073589163163746	f		40x	Gen1 MCFO (40x)	NA
R10E04	attP2	57C10PEST_brp_SNAP_MCFO_X23_0099	20181121_61_I4	Mon Dec 10 13:34:33 EST 2018	Sample#2612073589737783394	f		40x	Gen1 MCFO (40x)	NA
R10E04	attP2	57C10PEST_brp_SNAP_MCFO_X23_0099	20181121_61_I5	Mon Dec 10 13:34:33 EST 2018	Sample#2612073590304014434	f		40x	Gen1 MCFO (40x)	NA
R10E04	attP2	57C10PEST_brp_SNAP_MCFO_X23_0099	20181121_61_I6	Mon Dec 10 13:34:34 EST 2018	Sample#2612073590866051170	f		40x	Gen1 MCFO (40x)	NA
R10E04	attP2	pBPhsFlp2_PEST_brp_SNAP_MCFO_0128	20191015_62_E1	Fri Oct 25 16:24:18 EDT 2019	Sample#2727702935612948578	m	13	40x	Gen1 MCFO (40x)	NA
R10E04	attP2	pBPhsFlp2_PEST_brp_SNAP_MCFO_0128	20191015_62_E10	Fri Oct 25 16:24:19 EDT 2019	Sample#2727702943200444514	m	13	40x	Gen1 MCFO (40x)	NA
R10E04	attP2	pBPhsFlp2_PEST_brp_SNAP_MCFO_0128	20191015_62_E2	Fri Oct 25 16:24:18 EDT 2019	Sample#2727702936497946722	m	13	40x	Gen1 MCFO (40x)	NA
R10E04	attP2	pBPhsFlp2_PEST_brp_SNAP_MCFO_0128	20191015_62_E3	Fri Oct 25 16:24:18 EDT 2019	Sample#2727702937378750562	m	13	40x	Gen1 MCFO (40x)	NA
R10E04	attP2	pBPhsFlp2_PEST_brp_SNAP_MCFO_0128	20191015_62_E4	Fri Oct 25 16:24:18 EDT 2019	Sample#2727702938267943010	m	13	40x	Gen1 MCFO (40x)	NA
R10E04	attP2	pBPhsFlp2_PEST_brp_SNAP_MCFO_0128	20191015_62_E5	Fri Oct 25 16:24:18 EDT 2019	Sample#2727702939085832290	m	13	40x	Gen1 MCFO (40x)	NA
R10E04	attP2	pBPhsFlp2_PEST_brp_SNAP_MCFO_0128	20191015_62_E6	Fri Oct 25 16:24:19 EDT 2019	Sample#2727702939912110178	m	13	40x	Gen1 MCFO (40x)	NA
R10E04	attP2	pBPhsFlp2_PEST_brp_SNAP_MCFO_0128	20191015_62_E7	Fri Oct 25 16:24:19 EDT 2019	Sample#2727702940729999458	m	13	40x	Gen1 MCFO (40x)	NA
R10E04	attP2	pBPhsFlp2_PEST_brp_SNAP_MCFO_0128	20191015_62_E8	Fri Oct 25 16:24:19 EDT 2019	Sample#2727702941556277346	m	13	40x	Gen1 MCFO (40x)	NA
R10E04	attP2	pBPhsFlp2_PEST_brp_SNAP_MCFO_0128	20191015_62_E9	Fri Oct 25 16:24:19 EDT 2019	Sample#2727702942382555234	m	13	40x	Gen1 MCFO (40x)	NA
R10E05	attP2	57C10PEST_brp_SNAP_MCFO_X23_0099	20190430_65_A1	Tue May 14 16:02:41 EDT 2019	Sample#2668265886023942242	m		40x	Gen1 MCFO (40x)	NA
R10E05	attP2	57C10PEST_brp_SNAP_MCFO_X23_0099	20190430_65_A2	Tue May 14 16:02:41 EDT 2019	Sample#2668265886426595426	m		40x	Gen1 MCFO (40x)	NA
R10E05	attP2	57C10PEST_brp_SNAP_MCFO_X23_0099	20190430_65_A3	Tue May 14 16:02:41 EDT 2019	Sample#2668265886825054306	m		40x	Gen1 MCFO (40x)	NA
R10E05	attP2	57C10PEST_brp_SNAP_MCFO_X23_0099	20190430_65_A4	Tue May 14 16:02:41 EDT 2019	Sample#2668265887223513186	m		40x	Gen1 MCFO (40x)	NA
R10E05	attP2	57C10PEST_brp_SNAP_MCFO_X23_0099	20190430_65_A5	Tue May 14 16:02:41 EDT 2019	Sample#2668265887626166370	m		40x	Gen1 MCFO (40x)	NA
R10E05	attP2	57C10PEST_brp_SNAP_MCFO_X23_0099	20190430_65_A6	Tue May 14 16:02:41 EDT 2019	Sample#2668265888033013858	m		40x	Gen1 MCFO (40x)	NA
R10E05	attP2	pBPhsFlp2_PEST_brp_SNAP_MCFO_0128	20190917_63_A1	Wed Oct 02 15:50:35 EDT 2019	Sample#2719359531309072482	f	13	40x	Gen1 MCFO (40x)	NA
R10E05	attP2	pBPhsFlp2_PEST_brp_SNAP_MCFO_0128	20190917_63_A10	Wed Oct 02 15:50:36 EDT 2019	Sample#2719359535759229026	f	13	40x	Gen1 MCFO (40x)	NA
R10E05	attP2	pBPhsFlp2_PEST_brp_SNAP_MCFO_0128	20190917_63_A2	Wed Oct 02 15:50:35 EDT 2019	Sample#2719359531925635170	f	13	40x	Gen1 MCFO (40x)	NA
R10E05	attP2	pBPhsFlp2_PEST_brp_SNAP_MCFO_0128	20190917_63_A3	Wed Oct 02 15:50:35 EDT 2019	Sample#2719359532454117474	f	13	40x	Gen1 MCFO (40x)	NA
R10E05	attP2	pBPhsFlp2_PEST_brp_SNAP_MCFO_0128	20190917_63_A4	Wed Oct 02 15:50:35 EDT 2019	Sample#2719359532974211170	f	13	40x	Gen1 MCFO (40x)	NA
R10E05	attP2	pBPhsFlp2_PEST_brp_SNAP_MCFO_0128	20190917_63_A5	Wed Oct 02 15:50:36 EDT 2019	Sample#2719359533439778914	f	13	40x	Gen1 MCFO (40x)	NA
R10E05	attP2	pBPhsFlp2_PEST_brp_SNAP_MCFO_0128	20190917_63_A6	Wed Oct 02 15:50:36 EDT 2019	Sample#2719359533905346658	f	13	40x	Gen1 MCFO (40x)	NA
R10E05	attP2	pBPhsFlp2_PEST_brp_SNAP_MCFO_0128	20190917_63_A7	Wed Oct 02 15:50:36 EDT 2019	Sample#2719359534370914402	f	13	40x	Gen1 MCFO (40x)	NA
R10E05	attP2	pBPhsFlp2_PEST_brp_SNAP_MCFO_0128	20190917_63_A8	Wed Oct 02 15:50:36 EDT 2019	Sample#2719359534836482146	f	13	40x	Gen1 MCFO (40x)	NA
R10E05	attP2	pBPhsFlp2_PEST_brp_SNAP_MCFO_0128	20190917_63_A9	Wed Oct 02 15:50:36 EDT 2019	Sample#2719359535297855586	f	13	40x	Gen1 MCFO (40x)	NA
R10E06	attP2	57C10wt_attp8_3stop1	20130605_1_D2	Thu Apr 24 20:09:57 EDT 2014	Sample#1999360113969725538	f		20x	Annotator Gen1 MCFO	Tanya Wolff
R10E06	attP2	57C10wt_attp8_3stop1	20130605_1_D3	Thu Apr 24 20:09:57 EDT 2014	Sample#1999360114720505954	f		20x	Annotator Gen1 MCFO	Tanya Wolff
R10E06	attP2	57C10wt_attp8_3stop1	20130605_1_D4	Thu Apr 24 20:09:57 EDT 2014	Sample#1999360115429343330	f		20x	Annotator Gen1 MCFO	Tanya Wolff
R10E06	attP2	57C10wt_attp8_3stop1	20130605_1_D5	Thu Apr 24 20:09:58 EDT 2014	Sample#1999360116129792098	f		20x	Annotator Gen1 MCFO	Tanya Wolff
R10E06	attP2	57C10wt_attp8_3stop1	20130605_1_D6	Thu Apr 24 20:09:58 EDT 2014	Sample#1999360117182562402	f		20x	Annotator Gen1 MCFO	Tanya Wolff
R10E06	attP2	57C10wt_attp8_3stop1	20130605_1_E1	Thu Apr 24 20:09:58 EDT 2014	Sample#1999360118000451682	f		20x	Annotator Gen1 MCFO	Tanya Wolff
R10E06	attP2	57C10wt_attp8_3stop1	20130605_1_E2	Thu Apr 24 20:09:58 EDT 2014	Sample#1999360118663151714	f		20x	Annotator Gen1 MCFO	Tanya Wolff
R10E06	attP2	57C10wt_attp8_3stop1	20130605_1_E3	Thu Apr 24 20:09:58 EDT 2014	Sample#1999360119292297314	f		20x	Annotator Gen1 MCFO	Tanya Wolff
R10E06	attP2	57C10wt_attp8_3stop1	20130605_1_E4	Thu Apr 24 20:09:58 EDT 2014	Sample#1999360119925637218	f		20x	Annotator Gen1 MCFO	Tanya Wolff
R10E06	attP2	57C10wt_attp8_3stop1	20130605_1_E5	Thu Apr 24 20:09:59 EDT 2014	Sample#1999360120584142946	f		20x	Annotator Gen1 MCFO	Tanya Wolff
R10E06	attP2	57C10wt_attp8_3stop1	20130610_3_A1	Thu Mar 13 18:06:04 EDT 2014	Sample#1984108647210287202	f		20x	Annotator Gen1 MCFO	Tanya Wolff
R10E06	attP2	57C10wt_attp8_3stop1	20130610_3_A2	Thu Mar 13 18:06:04 EDT 2014	Sample#1984108648233697378	f		20x	Annotator Gen1 MCFO	Tanya Wolff
R10E06	attP2	57C10wt_attp8_3stop1	20130610_3_A3	Thu Mar 13 18:06:05 EDT 2014	Sample#1984108649869475938	f		20x	Annotator Gen1 MCFO	Tanya Wolff
R10E06	attP2	57C10wt_attp8_3stop1	20130610_3_A4	Thu Mar 13 18:06:05 EDT 2014	Sample#1984108652872597602	f		20x	Annotator Gen1 MCFO	Tanya Wolff
R10E06	attP2	57C10wt_attp8_3stop1	20130610_3_A5	Thu Mar 13 18:06:06 EDT 2014	Sample#1984108655829581922	f		20x	Annotator Gen1 MCFO	Tanya Wolff
R10E06	attP2	57C10wt_attp8_3stop1	20130610_3_A6	Thu Mar 13 18:06:06 EDT 2014	Sample#1984108656735551586	f		20x	Annotator Gen1 MCFO	Tanya Wolff
R10E06	attP2	57C10wt_attp8_3stop1	20130610_3_B1	Thu Mar 13 18:06:06 EDT 2014	Sample#1984108657322754146	f		20x	Annotator Gen1 MCFO	Tanya Wolff
R10E06	attP2	57C10PEST_brp_SNAP_MCFO_X23_0099	20181221_63_B1	Tue Jan 22 15:27:03 EST 2019	Sample#2627684577652506722	f		40x	Gen1 MCFO (40x)	NA
R10E06	attP2	57C10PEST_brp_SNAP_MCFO_X23_0099	20181221_63_B2	Tue Jan 22 15:27:03 EST 2019	Sample#2627684578281652322	f		40x	Gen1 MCFO (40x)	NA
R10E06	attP2	57C10PEST_brp_SNAP_MCFO_X23_0099	20190514_62_G1	Wed Jun 05 17:36:42 EDT 2019	Sample#2676262080692093026	m		40x	Gen1 MCFO (40x)	NA
R10E06	attP2	57C10PEST_brp_SNAP_MCFO_X23_0099	20190514_62_G2	Wed Jun 05 17:36:42 EDT 2019	Sample#2676262081153466466	m		40x	Gen1 MCFO (40x)	NA
R10E07	attP2	57C10wt_attp8_3stop1	20130605_1_E6	Thu Apr 24 20:09:59 EDT 2014	Sample#1999360121301368930	f		20x	Annotator Gen1 MCFO	Tanya Wolff
R10E07	attP2	57C10wt_attp8_3stop1	20130605_1_F3	Thu Apr 24 20:09:59 EDT 2014	Sample#1999360123939586146	f		20x	Annotator Gen1 MCFO	Tanya Wolff
R10E07	attP2	57C10wt_attp8_3stop1	20130605_1_F4	Thu Apr 24 20:10:00 EDT 2014	Sample#1999360124644229218	f		20x	Annotator Gen1 MCFO	Tanya Wolff
R10E07	attP2	57C10wt_attp8_3stop1	20130605_1_G1	Thu Apr 24 20:10:00 EDT 2014	Sample#1999360127504744546	f		20x	Annotator Gen1 MCFO	Tanya Wolff
R10E07	attP2	57C10wt_attp8_3stop1	20130610_3_B2	Thu Mar 13 18:06:07 EDT 2014	Sample#1984108658023202914	f		20x	Annotator Gen1 MCFO	Tanya Wolff
R10E07	attP2	57C10wt_attp8_3stop1	20130610_3_B3	Thu Mar 13 18:06:07 EDT 2014	Sample#1984108658836897890	f		20x	Annotator Gen1 MCFO	Tanya Wolff
R10E07	attP2	57C10wt_attp8_3stop1	20130610_3_B5	Thu Mar 13 18:06:07 EDT 2014	Sample#1984108660594311266	f		20x	Annotator Gen1 MCFO	Tanya Wolff
R10E07	attP2	hsPESTOPT_attP3_3stop1_X_0036	20140522_23_D1	Fri May 30 15:07:21 EDT 2014	Sample#2012329924093804642	f	30	20x	Annotator Gen1 MCFO	Aljoscha Nern
R10E07	attP2	hsPESTOPT_attP3_3stop1_X_0036	20140522_23_D2	Fri May 30 15:07:21 EDT 2014	Sample#2012329925205295202	f	30	20x	Annotator Gen1 MCFO	Aljoscha Nern
R10E07	attP2	hsPESTOPT_attP3_3stop1_X_0036	20140522_23_D3	Fri May 30 15:07:21 EDT 2014	Sample#2012329926404866146	f	30	20x	Annotator Gen1 MCFO	Aljoscha Nern
R10E07	attP2	hsPESTOPT_attP3_3stop1_X_0036	20140522_23_D4	Fri May 30 15:07:22 EDT 2014	Sample#2012329927562494050	f	30	20x	Annotator Gen1 MCFO	Aljoscha Nern
R10E07	attP2	hsPESTOPT_attP3_3stop1_X_0036	20140522_23_D5	Fri May 30 15:07:22 EDT 2014	Sample#2012329928678178914	f	30	20x	Annotator Gen1 MCFO	Aljoscha Nern
R10E07	attP2	hsPESTOPT_attP3_3stop1_X_0036	20140522_23_D6	Fri May 30 15:07:22 EDT 2014	Sample#2012329929793863778	f	30	20x	Annotator Gen1 MCFO	Aljoscha Nern
R10E07	attP2	hsPESTOPT_attP3_3stop1_X_0036	20140522_23_D7	Fri May 30 15:07:22 EDT 2014	Sample#2012329930947297378	f	30	20x	Annotator Gen1 MCFO	Aljoscha Nern
R10E07	attP2	hsPESTOPT_attP3_3stop1_X_0036	20140522_23_D8	Fri May 30 15:07:23 EDT 2014	Sample#2012329932138479714	f	30	20x	Annotator Gen1 MCFO	Aljoscha Nern
R10E07	attP2	hsPESTOPT_attP3_3stop1_X_0036	20140604_19_D1	Mon Jun 16 10:17:43 EDT 2014	Sample#2018417631282855943	f		20x	Annotator Gen1 MCFO	Aljoscha Nern
R10E07	attP2	hsPESTOPT_attP3_3stop1_X_0036	20140604_19_D2	Mon Jun 16 10:17:44 EDT 2014	Sample#2018417633111572487	f		20x	Annotator Gen1 MCFO	Aljoscha Nern
R10E07	attP2	hsPESTOPT_attP3_3stop1_X_0036	20140604_19_D3	Mon Jun 16 10:17:44 EDT 2014	Sample#2018417635074506759	f		20x	Annotator Gen1 MCFO	Aljoscha Nern
R10E07	attP2	hsPESTOPT_attP3_3stop1_X_0036	20140604_19_D4	Mon Jun 16 10:17:45 EDT 2014	Sample#2018417637003886599	f		20x	Annotator Gen1 MCFO	Aljoscha Nern
R10E07	attP2	hsPESTOPT_attP3_3stop1_X_0036	20140604_19_D5	Mon Jun 16 10:17:45 EDT 2014	Sample#2018417638912294919	f		20x	Annotator Gen1 MCFO	Aljoscha Nern
R10E07	attP2	hsPESTOPT_attP3_3stop1_X_0036	20140604_19_D6	Mon Jun 16 10:17:45 EDT 2014	Sample#2018417640636153863	f		20x	Annotator Gen1 MCFO	Aljoscha Nern
R10E07	attP2	hsPESTOPT_attP3_3stop1_X_0036	20140604_19_D7	Mon Jun 16 10:17:46 EDT 2014	Sample#2018417642347429895	f		20x	Annotator Gen1 MCFO	Aljoscha Nern
R10E07	attP2	hsPESTOPT_attP3_3stop1_X_0036	20140604_19_D8	Mon Jun 16 10:17:46 EDT 2014	Sample#2018417644142592007	f		20x	Annotator Gen1 MCFO	Aljoscha Nern
R10E07	attP2	hsPESTOPT_attP3_3stop1_X_0036	20140605_19_E1	Mon Jun 16 10:17:53 EDT 2014	Sample#2018417673783738375	f		20x	Annotator Gen1 MCFO	Aljoscha Nern
R10E07	attP2	hsPESTOPT_attP3_3stop1_X_0036	20140605_19_E2	Mon Jun 16 10:17:54 EDT 2014	Sample#2018417675545346055	f		20x	Annotator Gen1 MCFO	Aljoscha Nern
R10E07	attP2	hsPESTOPT_attP3_3stop1_X_0036	20140605_19_E3	Mon Jun 16 10:17:54 EDT 2014	Sample#2018417677466337287	f		20x	Annotator Gen1 MCFO	Aljoscha Nern
R10E07	attP2	hsPESTOPT_attP3_3stop1_X_0036	20140605_19_E4	Mon Jun 16 10:17:55 EDT 2014	Sample#2018417679265693703	f		20x	Annotator Gen1 MCFO	Aljoscha Nern
R10E07	attP2	hsPESTOPT_attP3_3stop1_X_0036	20140626_19_F1	Wed Jul 23 17:05:18 EDT 2014	Sample#2031928555268472930	f	30	20x	Annotator Gen1 MCFO	Aljoscha Nern
R10E07	attP2	hsPESTOPT_attP3_3stop1_X_0036	20140626_19_F6	Wed Jul 23 17:05:20 EDT 2014	Sample#2031928562193268834	f	30	20x	Annotator Gen1 MCFO	Aljoscha Nern
R10E07	attP2	hsPESTOPT_attP3_3stop1_X_0036	20140626_19_F7	Wed Jul 23 17:05:20 EDT 2014	Sample#2031928563510280290	f	30	20x	Annotator Gen1 MCFO	Aljoscha Nern
R10E07	attP2	57C10PEST_brp_SNAP_MCFO_X23_0099	20180828_61_H1	Fri Sep 14 14:04:52 EDT 2018	Sample#2580538375895253090	f		40x	Gen1 MCFO (40x)	NA
R10E07	attP2	57C10PEST_brp_SNAP_MCFO_X23_0099	20180828_61_H2	Fri Sep 14 14:04:52 EDT 2018	Sample#2580538376188854370	f		40x	Gen1 MCFO (40x)	NA
R10E07	attP2	57C10PEST_brp_SNAP_MCFO_X23_0099	20180828_61_H3	Fri Sep 14 14:04:53 EDT 2018	Sample#2580538376486649954	f		40x	Gen1 MCFO (40x)	NA
R10E07	attP2	57C10PEST_brp_SNAP_MCFO_X23_0099	20180828_61_H4	Fri Sep 14 14:04:53 EDT 2018	Sample#2580538376776056930	f		40x	Gen1 MCFO (40x)	NA
R10E07	attP2	57C10PEST_brp_SNAP_MCFO_X23_0099	20180828_61_H5	Fri Sep 14 14:04:53 EDT 2018	Sample#2580538377065463906	f		40x	Gen1 MCFO (40x)	NA
R10E07	attP2	57C10PEST_brp_SNAP_MCFO_X23_0099	20180828_61_H6	Fri Sep 14 14:04:53 EDT 2018	Sample#2580538377350676578	f		40x	Gen1 MCFO (40x)	NA
R10E07	attP2	pBPhsFlp2_PEST_brp_SNAP_MCFO_0128	20191203_65_K1	Thu Dec 19 17:17:22 EST 2019	Sample#2747662724635820130	m	40	40x	Gen1 MCFO (40x)	NA
R10E07	attP2	pBPhsFlp2_PEST_brp_SNAP_MCFO_0128	20191203_65_K2	Thu Dec 19 17:17:22 EST 2019	Sample#2747662725722144866	m	40	40x	Gen1 MCFO (40x)	NA
R10E07	attP2	pBPhsFlp2_PEST_brp_SNAP_MCFO_0128	20191203_65_K3	Thu Dec 19 17:17:23 EST 2019	Sample#2747662726795886690	m	40	40x	Gen1 MCFO (40x)	NA
R10E07	attP2	pBPhsFlp2_PEST_brp_SNAP_MCFO_0128	20191203_65_K4	Thu Dec 19 17:17:23 EST 2019	Sample#2747662727810908258	m	40	40x	Gen1 MCFO (40x)	NA
R10E07	attP2	pBPhsFlp2_PEST_brp_SNAP_MCFO_0128	20191203_65_K5	Thu Dec 19 17:17:23 EST 2019	Sample#2747662728846901346	m	40	40x	Gen1 MCFO (40x)	NA
R10E07	attP2	pBPhsFlp2_PEST_brp_SNAP_MCFO_0128	20191203_65_K6	Thu Dec 19 17:17:23 EST 2019	Sample#2747662729882894434	m	40	40x	Gen1 MCFO (40x)	NA
R10E08	attP2	57C10PEST_brp_SNAP_MCFO_X23_0099	20181109_64_E1	Tue Nov 27 17:38:51 EST 2018	Sample#2607424024929632354	f		40x	Gen1 MCFO (40x)	NA
R10E08	attP2	57C10PEST_brp_SNAP_MCFO_X23_0099	20181109_64_E2	Tue Nov 27 17:38:51 EST 2018	Sample#2607424025516834914	f		40x	Gen1 MCFO (40x)	NA
R10E08	attP2	57C10PEST_brp_SNAP_MCFO_X23_0099	20181109_64_E3	Tue Nov 27 17:38:51 EST 2018	Sample#2607424026053705826	f		40x	Gen1 MCFO (40x)	NA
R10E08	attP2	57C10PEST_brp_SNAP_MCFO_X23_0099	20181109_64_E4	Tue Nov 27 17:38:51 EST 2018	Sample#2607424026598965346	f		40x	Gen1 MCFO (40x)	NA
R10E08	attP2	57C10PEST_brp_SNAP_MCFO_X23_0099	20181109_64_E5	Tue Nov 27 17:38:51 EST 2018	Sample#2607424027140030562	f		40x	Gen1 MCFO (40x)	NA
R10E08	attP2	57C10PEST_brp_SNAP_MCFO_X23_0099	20181109_64_E6	Tue Nov 27 17:38:51 EST 2018	Sample#2607424027697872994	f		40x	Gen1 MCFO (40x)	NA
R10E08	attP2	57C10PEST_brp_SNAP_MCFO_X23_0099	20181109_64_F1	Tue Nov 27 17:38:51 EST 2018	Sample#2607424028322824290	f		40x	Gen1 MCFO (40x)	NA
R10E08	attP2	pBPhsFlp2_PEST_brp_SNAP_MCFO_0128	20191011_61_I1	Tue Oct 29 14:16:33 EDT 2019	Sample#2729120340209827938	m	13	40x	Gen1 MCFO (40x)	NA
R10E08	attP2	pBPhsFlp2_PEST_brp_SNAP_MCFO_0128	20191011_61_I10	Tue Oct 29 14:16:35 EDT 2019	Sample#2729120346983628898	m	13	40x	Gen1 MCFO (40x)	NA
R10E08	attP2	pBPhsFlp2_PEST_brp_SNAP_MCFO_0128	20191011_61_I2	Tue Oct 29 14:16:33 EDT 2019	Sample#2729120341103214690	m	13	40x	Gen1 MCFO (40x)	NA
R10E08	attP2	pBPhsFlp2_PEST_brp_SNAP_MCFO_0128	20191011_61_I3	Tue Oct 29 14:16:34 EDT 2019	Sample#2729120341992407138	m	13	40x	Gen1 MCFO (40x)	NA
R10E08	attP2	pBPhsFlp2_PEST_brp_SNAP_MCFO_0128	20191011_61_I4	Tue Oct 29 14:16:34 EDT 2019	Sample#2729120342881599586	m	13	40x	Gen1 MCFO (40x)	NA
R10E08	attP2	pBPhsFlp2_PEST_brp_SNAP_MCFO_0128	20191011_61_I6	Tue Oct 29 14:16:34 EDT 2019	Sample#2729120343703683170	m	13	40x	Gen1 MCFO (40x)	NA
R10E08	attP2	pBPhsFlp2_PEST_brp_SNAP_MCFO_0128	20191011_61_I7	Tue Oct 29 14:16:34 EDT 2019	Sample#2729120344521572450	m	13	40x	Gen1 MCFO (40x)	NA
R10E08	attP2	pBPhsFlp2_PEST_brp_SNAP_MCFO_0128	20191011_61_I8	Tue Oct 29 14:16:34 EDT 2019	Sample#2729120345339461730	m	13	40x	Gen1 MCFO (40x)	NA
R10E08	attP2	pBPhsFlp2_PEST_brp_SNAP_MCFO_0128	20191011_61_I9	Tue Oct 29 14:16:35 EDT 2019	Sample#2729120346165739618	m	13	40x	Gen1 MCFO (40x)	NA
R10F07	attP2	57C10PEST_brp_SNAP_MCFO_X23_0099	20181121_63_I1	Mon Dec 17 15:08:57 EST 2018	Sample#2614634061720715362	f		40x	Gen1 MCFO (40x)	NA
R10F07	attP2	57C10PEST_brp_SNAP_MCFO_X23_0099	20181121_63_I2	Mon Dec 17 15:08:58 EST 2018	Sample#2614634062282752098	f		40x	Gen1 MCFO (40x)	NA
R10F07	attP2	57C10PEST_brp_SNAP_MCFO_X23_0099	20181121_63_I3	Mon Dec 17 15:08:58 EST 2018	Sample#2614634062844788834	f		40x	Gen1 MCFO (40x)	NA
R10F07	attP2	57C10PEST_brp_SNAP_MCFO_X23_0099	20181121_63_I4	Mon Dec 17 15:08:58 EST 2018	Sample#2614634063469740130	f		40x	Gen1 MCFO (40x)	NA
R10F07	attP2	57C10PEST_brp_SNAP_MCFO_X23_0099	20181121_63_I5	Mon Dec 17 15:08:58 EST 2018	Sample#2614634064014999650	f		40x	Gen1 MCFO (40x)	NA
R10F07	attP2	57C10PEST_brp_SNAP_MCFO_X23_0099	20181121_63_I6	Mon Dec 17 15:08:58 EST 2018	Sample#2614634064577036386	f		40x	Gen1 MCFO (40x)	NA
R10F07	attP2	pBPhsFlp2_PEST_brp_SNAP_MCFO_0128	20191011_63_A1	Tue Oct 29 18:29:49 EDT 2019	Sample#2729184074592682082	m	13	40x	Gen1 MCFO (40x)	NA
R10F07	attP2	pBPhsFlp2_PEST_brp_SNAP_MCFO_0128	20191011_63_A10	Tue Oct 29 18:29:51 EDT 2019	Sample#2729184082326978658	m	13	40x	Gen1 MCFO (40x)	NA
R10F07	attP2	pBPhsFlp2_PEST_brp_SNAP_MCFO_0128	20191011_63_A2	Tue Oct 29 18:29:49 EDT 2019	Sample#2729184075532206178	m	13	40x	Gen1 MCFO (40x)	NA
R10F07	attP2	pBPhsFlp2_PEST_brp_SNAP_MCFO_0128	20191011_63_A3	Tue Oct 29 18:29:49 EDT 2019	Sample#2729184076425592930	m	13	40x	Gen1 MCFO (40x)	NA
R10F07	attP2	pBPhsFlp2_PEST_brp_SNAP_MCFO_0128	20191011_63_A4	Tue Oct 29 18:29:49 EDT 2019	Sample#2729184077394477154	m	13	40x	Gen1 MCFO (40x)	NA
R10F07	attP2	pBPhsFlp2_PEST_brp_SNAP_MCFO_0128	20191011_63_A5	Tue Oct 29 18:29:50 EDT 2019	Sample#2729184078216560738	m	13	40x	Gen1 MCFO (40x)	NA
R10F07	attP2	pBPhsFlp2_PEST_brp_SNAP_MCFO_0128	20191011_63_A6	Tue Oct 29 18:29:50 EDT 2019	Sample#2729184079034450018	m	13	40x	Gen1 MCFO (40x)	NA
R10F07	attP2	pBPhsFlp2_PEST_brp_SNAP_MCFO_0128	20191011_63_A7	Tue Oct 29 18:29:50 EDT 2019	Sample#2729184079856533602	m	13	40x	Gen1 MCFO (40x)	NA
R10F07	attP2	pBPhsFlp2_PEST_brp_SNAP_MCFO_0128	20191011_63_A8	Tue Oct 29 18:29:50 EDT 2019	Sample#2729184080699588706	m	13	40x	Gen1 MCFO (40x)	NA
R10F07	attP2	pBPhsFlp2_PEST_brp_SNAP_MCFO_0128	20191011_63_A9	Tue Oct 29 18:29:50 EDT 2019	Sample#2729184081513283682	m	13	40x	Gen1 MCFO (40x)	NA
R10F08	attP2	57C10PEST_attp18_4stop1	20161216_28_F1	Tue Dec 27 17:45:17 EST 2016	Sample#2353754138887585890	f		20x, 63x	Annotator Gen1 MCFO	Masayoshi Ito
R10F08	attP2	57C10PEST_attp18_4stop1	20161216_28_F2	Tue Dec 27 17:45:17 EST 2016	Sample#2353754139030192226	f		20x	Annotator Gen1 MCFO	Masayoshi Ito
R10F08	attP2	57C10PEST_attp18_4stop1	20161216_28_F3	Tue Dec 27 17:45:17 EST 2016	Sample#2353754139168604258	f		20x, 63x	Annotator Gen1 MCFO	Masayoshi Ito
R10F08	attP2	57C10PEST_attp18_4stop1	20161216_28_F4	Tue Dec 27 17:45:17 EST 2016	Sample#2353754139311210594	f		20x	Annotator Gen1 MCFO	Masayoshi Ito
R10F08	attP2	57C10PEST_attp18_4stop1	20161216_28_F5	Tue Dec 27 17:45:17 EST 2016	Sample#2353754139449622626	f		20x, 63x	Annotator Gen1 MCFO	Masayoshi Ito
R10F08	attP2	57C10PEST_attp18_4stop1	20161216_28_F6	Tue Dec 27 17:45:17 EST 2016	Sample#2353754139592228962	f		20x	Annotator Gen1 MCFO	Masayoshi Ito
R10F08	attP2	57C10PEST_attp18_4stop1	20161216_28_F7	Tue Dec 27 17:45:17 EST 2016	Sample#2353754139730640994	f		20x	Annotator Gen1 MCFO	Masayoshi Ito
R10F08	attP2	57C10PEST_attp18_4stop1	20161216_28_F8	Tue Dec 27 17:45:17 EST 2016	Sample#2353754139873247330	f		20x	Annotator Gen1 MCFO	Masayoshi Ito
R10F08	attP2	57C10PEST_attp18_4stop1	20161216_28_G1	Tue Dec 27 17:45:17 EST 2016	Sample#2353754140011659362	f		20x, 63x	Annotator Gen1 MCFO	Masayoshi Ito
R10F08	attP2	57C10PEST_brp_SNAP_MCFO_X23_0099	20180828_61_I1	Fri Sep 14 14:04:53 EDT 2018	Sample#2580538377644277858	f		40x	Gen1 MCFO (40x)	NA
R10F08	attP2	57C10PEST_brp_SNAP_MCFO_X23_0099	20180828_61_I2	Fri Sep 14 14:04:53 EDT 2018	Sample#2580538377929490530	f		40x	Gen1 MCFO (40x)	NA
R10F08	attP2	57C10PEST_brp_SNAP_MCFO_X23_0099	20180828_61_I3	Fri Sep 14 14:04:53 EDT 2018	Sample#2580538378218897506	f		40x	Gen1 MCFO (40x)	NA
R10F08	attP2	57C10PEST_brp_SNAP_MCFO_X23_0099	20180828_61_I4	Fri Sep 14 14:04:53 EDT 2018	Sample#2580538378508304482	f		40x	Gen1 MCFO (40x)	NA
R10F08	attP2	57C10PEST_brp_SNAP_MCFO_X23_0099	20180828_61_I5	Fri Sep 14 14:04:53 EDT 2018	Sample#2580538378797711458	f		40x	Gen1 MCFO (40x)	NA
R10F08	attP2	57C10PEST_brp_SNAP_MCFO_X23_0099	20180828_61_I6	Fri Sep 14 14:04:53 EDT 2018	Sample#2580538379087118434	f		40x	Gen1 MCFO (40x)	NA
R10F10	attP2	57C10PEST_brp_SNAP_MCFO_X23_0099	20181121_61_J1	Mon Dec 10 13:34:34 EST 2018	Sample#2612073591453253730	f		40x	Gen1 MCFO (40x)	NA
R10F10	attP2	57C10PEST_brp_SNAP_MCFO_X23_0099	20181121_61_J2	Mon Dec 10 13:34:34 EST 2018	Sample#2612073592040456290	f		40x	Gen1 MCFO (40x)	NA
R10F10	attP2	57C10PEST_brp_SNAP_MCFO_X23_0099	20181121_61_J3	Mon Dec 10 13:34:34 EST 2018	Sample#2612073592606687330	f		40x	Gen1 MCFO (40x)	NA
R10F10	attP2	57C10PEST_brp_SNAP_MCFO_X23_0099	20181121_61_J4	Mon Dec 10 13:34:34 EST 2018	Sample#2612073593546211426	f		40x	Gen1 MCFO (40x)	NA
R10F10	attP2	57C10PEST_brp_SNAP_MCFO_X23_0099	20181121_61_J5	Mon Dec 10 13:34:34 EST 2018	Sample#2612073594120831074	f		40x	Gen1 MCFO (40x)	NA
R10F10	attP2	57C10PEST_brp_SNAP_MCFO_X23_0099	20181121_61_J6	Mon Dec 10 13:34:34 EST 2018	Sample#2612073594741588066	f		40x	Gen1 MCFO (40x)	NA
R10G01	attP2	57C10PEST_brp_SNAP_MCFO_X23_0099	20181121_63_J1	Mon Dec 17 15:08:58 EST 2018	Sample#2614634065139073122	f		40x	Gen1 MCFO (40x)	NA
R10G01	attP2	57C10PEST_brp_SNAP_MCFO_X23_0099	20181121_63_J2	Mon Dec 17 15:08:58 EST 2018	Sample#2614634065688526946	f		40x	Gen1 MCFO (40x)	NA
R10G01	attP2	57C10PEST_brp_SNAP_MCFO_X23_0099	20181121_63_J3	Mon Dec 17 15:08:58 EST 2018	Sample#2614634066237980770	f		40x	Gen1 MCFO (40x)	NA
R10G01	attP2	57C10PEST_brp_SNAP_MCFO_X23_0099	20181121_63_J4	Tue Dec 18 15:08:15 EST 2018	Sample#2614996271055765602	f		40x	Gen1 MCFO (40x)	NA
R10G01	attP2	57C10PEST_brp_SNAP_MCFO_X23_0099	20181121_63_J5	Tue Dec 18 15:08:15 EST 2018	Sample#2614996271613608034	f		40x	Gen1 MCFO (40x)	NA
R10G01	attP2	57C10PEST_brp_SNAP_MCFO_X23_0099	20181121_63_J6	Tue Dec 18 15:08:15 EST 2018	Sample#2614996272439885922	f		40x	Gen1 MCFO (40x)	NA
R10G01	attP2	pBPhsFlp2_PEST_brp_SNAP_MCFO_0128	20191011_63_B1	Tue Oct 29 18:29:51 EDT 2019	Sample#2729184083157450850	m	13	40x	Gen1 MCFO (40x)	NA
R10G01	attP2	pBPhsFlp2_PEST_brp_SNAP_MCFO_0128	20191011_63_B2	Tue Oct 29 18:29:51 EDT 2019	Sample#2729184084046643298	m	13	40x	Gen1 MCFO (40x)	NA
R10G01	attP2	pBPhsFlp2_PEST_brp_SNAP_MCFO_0128	20191011_63_B3	Tue Oct 29 18:29:51 EDT 2019	Sample#2729184084931641442	m	13	40x	Gen1 MCFO (40x)	NA
R10G01	attP2	pBPhsFlp2_PEST_brp_SNAP_MCFO_0128	20191011_63_B4	Tue Oct 29 18:29:51 EDT 2019	Sample#2729184085825028194	m	13	40x	Gen1 MCFO (40x)	NA
R10G02	attP2	57C10wt_attp8_3stop1	20130523_1_A2	Mon Apr 28 11:40:32 EDT 2014	Sample#2000681468325527650	f		20x	Annotator Gen1 MCFO	Tanya Wolff
R10G02	attP2	57C10wt_attp8_3stop1	20130523_1_A3	Mon Apr 28 11:40:33 EDT 2014	Sample#2000681469176971362	f		20x	Annotator Gen1 MCFO	Tanya Wolff
R10G02	attP2	57C10PEST_brp_SNAP_MCFO_X23_0099	20190115_62_B1	Mon Jan 28 14:51:00 EST 2019	Sample#2629849832579137634	f		40x	Gen1 MCFO (40x)	NA
R10G02	attP2	57C10PEST_brp_SNAP_MCFO_X23_0099	20190115_62_B2	Mon Jan 28 14:51:00 EST 2019	Sample#2629849833644490850	f		40x	Gen1 MCFO (40x)	NA
R10G02	attP2	57C10PEST_brp_SNAP_MCFO_X23_0099	20190115_62_B3	Mon Jan 28 14:51:00 EST 2019	Sample#2629849834269442146	f		40x	Gen1 MCFO (40x)	NA
R10G02	attP2	57C10PEST_brp_SNAP_MCFO_X23_0099	20190115_62_B4	Mon Jan 28 14:51:00 EST 2019	Sample#2629849834856644706	f		40x	Gen1 MCFO (40x)	NA
R10G02	attP2	57C10PEST_brp_SNAP_MCFO_X23_0099	20190115_62_B5	Mon Jan 28 14:51:01 EST 2019	Sample#2629849835443847266	f		40x	Gen1 MCFO (40x)	NA
R10G02	attP2	57C10PEST_brp_SNAP_MCFO_X23_0099	20190115_62_B6	Mon Jan 28 14:51:01 EST 2019	Sample#2629849835976523874	f		40x	Gen1 MCFO (40x)	NA
R10G02	attP2	pBPhsFlp2_PEST_brp_SNAP_MCFO_0128	20190726_62_B1	Fri Aug 09 12:40:34 EDT 2019	Sample#2699742767705227362	m	40	40x	Gen1 MCFO (40x)	NA
R10G02	attP2	pBPhsFlp2_PEST_brp_SNAP_MCFO_0128	20190726_62_B2	Fri Aug 09 12:40:34 EDT 2019	Sample#2699742768204349538	m	40	40x	Gen1 MCFO (40x)	NA
R10G02	attP2	pBPhsFlp2_PEST_brp_SNAP_MCFO_0128	20190726_62_B3	Fri Aug 09 12:40:34 EDT 2019	Sample#2699742768699277410	m	40	40x	Gen1 MCFO (40x)	NA
R10G02	attP2	pBPhsFlp2_PEST_brp_SNAP_MCFO_0128	20190726_62_B4	Fri Aug 09 12:40:34 EDT 2019	Sample#2699742769143873634	m	40	40x	Gen1 MCFO (40x)	NA
R10G02	attP2	pBPhsFlp2_PEST_brp_SNAP_MCFO_0128	20190726_62_B5	Fri Aug 09 12:40:35 EDT 2019	Sample#2699742769584275554	m	40	40x	Gen1 MCFO (40x)	NA
R10G02	attP2	pBPhsFlp2_PEST_brp_SNAP_MCFO_0128	20190726_62_B6	Fri Aug 09 12:40:35 EDT 2019	Sample#2699742770024677474	m	40	40x	Gen1 MCFO (40x)	NA
R10G03	attP2	57C10wt_attp8_3stop1	20130605_1_G2	Thu Apr 24 20:10:00 EDT 2014	Sample#1999360128138084450	f		20x	Annotator Gen1 MCFO	Tanya Wolff
R10G03	attP2	57C10wt_attp8_3stop1	20130605_1_G3	Thu Apr 24 20:10:01 EDT 2014	Sample#1999360128737869922	f		20x	Annotator Gen1 MCFO	Tanya Wolff
R10G03	attP2	57C10wt_attp8_3stop1	20130605_1_G4	Thu Apr 24 20:10:01 EDT 2014	Sample#1999360129367015522	f		20x	Annotator Gen1 MCFO	Tanya Wolff
R10G03	attP2	57C10wt_attp8_3stop1	20130605_1_G5	Thu Apr 24 20:10:01 EDT 2014	Sample#1999360130067464290	f		20x	Annotator Gen1 MCFO	Tanya Wolff
R10G03	attP2	57C10wt_attp8_3stop1	20130605_1_H1	Thu Apr 24 20:10:01 EDT 2014	Sample#1999360131598385250	f		20x	Annotator Gen1 MCFO	Tanya Wolff
R10G03	attP2	57C10wt_attp8_3stop1	20130605_1_H2	Thu Apr 24 20:10:01 EDT 2014	Sample#1999360132307222626	f		20x	Annotator Gen1 MCFO	Tanya Wolff
R10G03	attP2	57C10wt_attp8_3stop1	20130605_1_H3	Thu Apr 24 20:10:02 EDT 2014	Sample#1999360132982505570	f		20x	Annotator Gen1 MCFO	Tanya Wolff
R10G03	attP2	57C10wt_attp8_3stop1	20130605_1_H4	Thu Apr 24 20:10:02 EDT 2014	Sample#1999360133695537250	f		20x	Annotator Gen1 MCFO	Tanya Wolff
R10G03	attP2	57C10wt_attp8_3stop1	20130605_1_H5	Thu Apr 24 20:10:02 EDT 2014	Sample#1999360134349848674	f		20x	Annotator Gen1 MCFO	Tanya Wolff
R10G03	attP2	57C10wt_attp8_3stop1	20130610_3_C2	Thu Mar 13 18:06:08 EDT 2014	Sample#1984108663849091170	f		20x	Annotator Gen1 MCFO	Tanya Wolff
R10G03	attP2	57C10wt_attp8_3stop1	20130610_3_C3	Thu Mar 13 18:06:08 EDT 2014	Sample#1984108664797003874	f		20x	Annotator Gen1 MCFO	Tanya Wolff
R10G03	attP2	57C10wt_attp8_3stop1	20130610_3_C4	Thu Mar 13 18:06:08 EDT 2014	Sample#1984108665124159586	f		20x	Annotator Gen1 MCFO	Tanya Wolff
R10G03	attP2	57C10wt_attp8_3stop1	20130610_3_C5	Thu Mar 13 18:06:08 EDT 2014	Sample#1984108666021740642	f		20x	Annotator Gen1 MCFO	Tanya Wolff
R10G03	attP2	57C10wt_attp8_3stop1	20130610_3_C6	Thu Mar 13 18:06:09 EDT 2014	Sample#1984108666827047010	f		20x	Annotator Gen1 MCFO	Tanya Wolff
R10G03	attP2	57C10wt_attp8_3stop1	20130610_3_D1	Thu Mar 13 18:06:09 EDT 2014	Sample#1984108667728822370	f		20x	Annotator Gen1 MCFO	Tanya Wolff
R10G03	attP2	57C10wt_attp8_3stop1	20130610_3_D2	Thu Mar 13 18:06:09 EDT 2014	Sample#1984108668462825570	f		20x	Annotator Gen1 MCFO	Tanya Wolff
R10G03	attP2	57C10wt_attp8_3stop1	20130610_3_D3	Thu Mar 13 18:06:10 EDT 2014	Sample#1984108670551588962	f		20x	Annotator Gen1 MCFO	Tanya Wolff
R10G03	attP2	57C10wt_attp8_3stop1	20130610_3_D4	Thu Mar 13 18:06:10 EDT 2014	Sample#1984108672086704226	f		20x	Annotator Gen1 MCFO	Tanya Wolff
R10G03	attP2	57C10wt_attp8_3stop1	20130610_3_D5	Thu Mar 13 18:06:10 EDT 2014	Sample#1984108672627769442	f		20x	Annotator Gen1 MCFO	Tanya Wolff
R10G03	attP2	57C10PEST_brp_SNAP_MCFO_X23_0099	20181121_61_A1	Mon Dec 10 13:34:27 EST 2018	Sample#2612073563405942882	f		40x	Gen1 MCFO (40x)	NA
R10G03	attP2	57C10PEST_brp_SNAP_MCFO_X23_0099	20181121_61_A2	Mon Dec 10 13:34:27 EST 2018	Sample#2612073564135751778	f		40x	Gen1 MCFO (40x)	NA
R10G03	attP2	57C10PEST_brp_SNAP_MCFO_X23_0099	20181121_61_A3	Mon Dec 10 13:34:27 EST 2018	Sample#2612073564710371426	f		40x	Gen1 MCFO (40x)	NA
R10G03	attP2	57C10PEST_brp_SNAP_MCFO_X23_0099	20181121_61_A4	Mon Dec 10 13:34:27 EST 2018	Sample#2612073565289185378	f		40x	Gen1 MCFO (40x)	NA
R10G03	attP2	57C10PEST_brp_SNAP_MCFO_X23_0099	20181121_61_A5	Mon Dec 10 13:34:28 EST 2018	Sample#2612073565884776546	f		40x	Gen1 MCFO (40x)	NA
R10G03	attP2	57C10PEST_brp_SNAP_MCFO_X23_0099	20181121_61_A6	Mon Dec 10 13:34:28 EST 2018	Sample#2612073566463590498	f		40x	Gen1 MCFO (40x)	NA
R10G03	attP2	pBPhsFlp2_PEST_brp_SNAP_MCFO_0128	20191011_63_C1	Tue Oct 29 18:29:52 EDT 2019	Sample#2729184086651306082	m	13	40x	Gen1 MCFO (40x)	NA
R10G03	attP2	pBPhsFlp2_PEST_brp_SNAP_MCFO_0128	20191011_63_C10	Tue Oct 29 18:29:53 EDT 2019	Sample#2729184094301716578	m	13	40x	Gen1 MCFO (40x)	NA
R10G03	attP2	pBPhsFlp2_PEST_brp_SNAP_MCFO_0128	20191011_63_C2	Tue Oct 29 18:29:52 EDT 2019	Sample#2729184087536304226	m	13	40x	Gen1 MCFO (40x)	NA
R10G03	attP2	pBPhsFlp2_PEST_brp_SNAP_MCFO_0128	20191011_63_C3	Tue Oct 29 18:29:52 EDT 2019	Sample#2729184088438079586	m	13	40x	Gen1 MCFO (40x)	NA
R10G03	attP2	pBPhsFlp2_PEST_brp_SNAP_MCFO_0128	20191011_63_C4	Tue Oct 29 18:29:52 EDT 2019	Sample#2729184089356632162	m	13	40x	Gen1 MCFO (40x)	NA
R10G03	attP2	pBPhsFlp2_PEST_brp_SNAP_MCFO_0128	20191011_63_C5	Tue Oct 29 18:29:52 EDT 2019	Sample#2729184090182910050	m	13	40x	Gen1 MCFO (40x)	NA
R10G03	attP2	pBPhsFlp2_PEST_brp_SNAP_MCFO_0128	20191011_63_C6	Tue Oct 29 18:29:53 EDT 2019	Sample#2729184091000799330	m	13	40x	Gen1 MCFO (40x)	NA
R10G03	attP2	pBPhsFlp2_PEST_brp_SNAP_MCFO_0128	20191011_63_C7	Tue Oct 29 18:29:53 EDT 2019	Sample#2729184091818688610	m	13	40x	Gen1 MCFO (40x)	NA
R10G03	attP2	pBPhsFlp2_PEST_brp_SNAP_MCFO_0128	20191011_63_C8	Tue Oct 29 18:29:53 EDT 2019	Sample#2729184092640772194	m	13	40x	Gen1 MCFO (40x)	NA
R10G03	attP2	pBPhsFlp2_PEST_brp_SNAP_MCFO_0128	20191011_63_C9	Tue Oct 29 18:29:53 EDT 2019	Sample#2729184093471244386	m	13	40x	Gen1 MCFO (40x)	NA
R10G09	attP2	57C10PEST_attp18_4stop1	20140508_32_B1	Mon May 19 03:53:55 EDT 2014	Sample#2008174184827453538	f		20x	Annotator Gen1 MCFO	Aljoscha Nern
R10G09	attP2	57C10PEST_attp18_4stop1	20140508_32_B2	Mon May 19 03:53:56 EDT 2014	Sample#2008174186207379554	f		20x	Annotator Gen1 MCFO	Aljoscha Nern
R10G09	attP2	57C10PEST_attp18_4stop1	20140508_32_B3	Mon May 19 03:53:56 EDT 2014	Sample#2008174187377590370	f		20x	Annotator Gen1 MCFO	Aljoscha Nern
R10G09	attP2	57C10PEST_attp18_4stop1	20140508_32_B4	Mon May 19 03:53:56 EDT 2014	Sample#2008174188518441058	f		20x	Annotator Gen1 MCFO	Aljoscha Nern
R10G09	attP2	57C10PEST_attp18_4stop1	20140508_32_B5	Mon May 19 03:53:56 EDT 2014	Sample#2008174189558628450	f		20x	Annotator Gen1 MCFO	Aljoscha Nern
R10G09	attP2	57C10PEST_attp18_4stop1	20140508_32_B6	Mon May 19 03:53:57 EDT 2014	Sample#2008174190519124066	f		20x	Annotator Gen1 MCFO	Aljoscha Nern
R10G09	attP2	57C10PEST_attp18_4stop1	20140508_32_B7	Sun Apr 24 16:34:47 EDT 2016	Sample#2264211495522926690	f		20x, 63x	Annotator Gen1 MCFO	Aljoscha Nern
R10G09	attP2	57C10PEST_attp18_4stop1	20160407_19_I1	Mon May 09 16:46:48 EDT 2016	Sample#2269650339202334818	f		20x, 63x	Annotator Gen1 MCFO	Jens Goldammer
R10G09	attP2	57C10PEST_attp18_4stop1	20160407_19_I2	Wed Apr 20 15:53:10 EDT 2016	Sample#2262751471634219106	f		20x	Annotator Gen1 MCFO	Jens Goldammer
R10G09	attP2	57C10PEST_attp18_4stop1	20160407_19_I3	Mon May 09 16:46:55 EDT 2016	Sample#2269650368205946978	f		20x, 63x	Annotator Gen1 MCFO	Jens Goldammer
R10G09	attP2	57C10PEST_attp18_4stop1	20160407_19_I4	Wed Apr 20 15:53:10 EDT 2016	Sample#2262751472506634338	f		20x	Annotator Gen1 MCFO	Jens Goldammer
R10G09	attP2	57C10PEST_attp18_4stop1	20160407_19_I5	Mon May 09 16:47:01 EDT 2016	Sample#2269650392172200034	f		20x, 63x	Annotator Gen1 MCFO	Jens Goldammer
R10G09	attP2	57C10PEST_attp18_4stop1	20160407_19_I6	Mon May 09 16:47:04 EDT 2016	Sample#2269650405728190562	f		20x, 63x	Annotator Gen1 MCFO	Jens Goldammer
R10G09	attP2	57C10PEST_attp18_4stop1	20160407_19_I7	Wed Apr 20 15:53:11 EDT 2016	Sample#2262751473945280610	f		20x	Annotator Gen1 MCFO	Jens Goldammer
R10G09	attP2	57C10PEST_attp18_4stop1	20160407_19_I8	Mon May 09 16:47:08 EDT 2016	Sample#2269650421951758434	f		20x, 63x	Annotator Gen1 MCFO	Jens Goldammer
R10G09	attP2	57C10PEST_brp_SNAP_MCFO_X23_0099	20181121_62_A1	Thu Dec 20 12:07:31 EST 2018	Sample#2615675563032969314	f		40x	Gen1 MCFO (40x)	NA
R10G09	attP2	57C10PEST_brp_SNAP_MCFO_X23_0099	20181121_62_A2	Thu Dec 20 12:07:31 EST 2018	Sample#2615675563628560482	f		40x	Gen1 MCFO (40x)	NA
R10G09	attP2	57C10PEST_brp_SNAP_MCFO_X23_0099	20181121_62_A3	Thu Dec 20 12:07:31 EST 2018	Sample#2615675564207374434	f		40x	Gen1 MCFO (40x)	NA
R10G09	attP2	57C10PEST_brp_SNAP_MCFO_X23_0099	20181121_62_A4	Thu Dec 20 12:07:31 EST 2018	Sample#2615675564769411170	f		40x	Gen1 MCFO (40x)	NA
R10G09	attP2	57C10PEST_brp_SNAP_MCFO_X23_0099	20181121_62_A5	Thu Dec 20 12:07:31 EST 2018	Sample#2615675565335642210	f		40x	Gen1 MCFO (40x)	NA
R10G09	attP2	57C10PEST_brp_SNAP_MCFO_X23_0099	20181121_62_A6	Thu Dec 20 12:07:31 EST 2018	Sample#2615675566027702370	f		40x	Gen1 MCFO (40x)	NA
R10G09	attP2	pBPhsFlp2_PEST_brp_SNAP_MCFO_0128	20191025_62_J1	Fri Nov 15 19:30:17 EST 2019	Sample#2735374986196811874	m	40	40x	Gen1 MCFO (40x)	NA
R10G09	attP2	pBPhsFlp2_PEST_brp_SNAP_MCFO_0128	20191025_62_J2	Fri Nov 15 19:30:17 EST 2019	Sample#2735374987178279010	m	40	40x	Gen1 MCFO (40x)	NA
R10G09	attP2	pBPhsFlp2_PEST_brp_SNAP_MCFO_0128	20191025_62_J3	Fri Nov 15 19:30:17 EST 2019	Sample#2735374988138774626	m	40	40x	Gen1 MCFO (40x)	NA
R10G09	attP2	pBPhsFlp2_PEST_brp_SNAP_MCFO_0128	20191025_62_J4	Fri Nov 15 19:30:18 EST 2019	Sample#2735374989099270242	m	40	40x	Gen1 MCFO (40x)	NA
R10G09	attP2	pBPhsFlp2_PEST_brp_SNAP_MCFO_0128	20191025_62_J5	Fri Nov 15 19:30:18 EST 2019	Sample#2735374989980074082	m	40	40x	Gen1 MCFO (40x)	NA
R10G09	attP2	pBPhsFlp2_PEST_brp_SNAP_MCFO_0128	20191025_62_J6	Fri Nov 15 19:30:18 EST 2019	Sample#2735374990865072226	m	40	40x	Gen1 MCFO (40x)	NA
R10G09	attP2	pBPhsFlp2_PEST_brp_SNAP_MCFO_0128	20191025_62_J7	Fri Nov 15 19:30:18 EST 2019	Sample#2735374991745876066	m	40	40x	Gen1 MCFO (40x)	NA
R10G10	attP2	hsPESTOPT_attP3_3stop1_X_0036	20191127_19_A1	Thu Dec 12 10:50:03 EST 2019	Sample#2745028537462292578	m	15	20x	Annotator Gen1 MCFO	DI Project
R10G10	attP2	hsPESTOPT_attP3_3stop1_X_0036	20191127_19_A2	Thu Dec 12 10:50:03 EST 2019	Sample#2745028537802031202	m	15	20x	Annotator Gen1 MCFO	DI Project
R10G10	attP2	hsPESTOPT_attP3_3stop1_X_0036	20191127_19_A3	Thu Dec 12 10:50:07 EST 2019	Sample#2745028554361143394	m	15	20x	Annotator Gen1 MCFO	DI Project
R10G10	attP2	hsPESTOPT_attP3_3stop1_X_0036	20191127_19_A4	Thu Dec 12 10:50:07 EST 2019	Sample#2745028554709270626	m	15	20x	Annotator Gen1 MCFO	DI Project
R10G10	attP2	hsPESTOPT_attP3_3stop1_X_0036	20191127_19_A5	Thu Dec 12 10:50:07 EST 2019	Sample#2745028555103535202	m	15	20x	Annotator Gen1 MCFO	DI Project
R10G10	attP2	hsPESTOPT_attP3_3stop1_X_0036	20191127_19_A6	Thu Dec 12 10:50:07 EST 2019	Sample#2745028555455856738	m	15	20x	Annotator Gen1 MCFO	DI Project
R10G10	attP2	hsPESTOPT_attP3_3stop1_X_0036	20191127_19_A7	Thu Dec 12 10:50:07 EST 2019	Sample#2745028555808178274	m	15	20x	Annotator Gen1 MCFO	DI Project
R10G10	attP2	57C10PEST_brp_SNAP_MCFO_X23_0099	20181109_64_G1	Tue Nov 27 17:38:52 EST 2018	Sample#2607424028897443938	f		40x	Gen1 MCFO (40x)	NA
R10G10	attP2	57C10PEST_brp_SNAP_MCFO_X23_0099	20181109_64_G2	Tue Nov 27 17:38:52 EST 2018	Sample#2607424029451092066	f		40x	Gen1 MCFO (40x)	NA
R10G10	attP2	57C10PEST_brp_SNAP_MCFO_X23_0099	20181109_64_G3	Tue Nov 27 17:38:52 EST 2018	Sample#2607424030004740194	f		40x	Gen1 MCFO (40x)	NA
R10G10	attP2	57C10PEST_brp_SNAP_MCFO_X23_0099	20181109_64_G4	Tue Nov 27 17:38:52 EST 2018	Sample#2607424030734549090	f		40x	Gen1 MCFO (40x)	NA
R10G10	attP2	57C10PEST_brp_SNAP_MCFO_X23_0099	20181109_64_G5	Tue Nov 27 17:38:52 EST 2018	Sample#2607424031284002914	f		40x	Gen1 MCFO (40x)	NA
R10G10	attP2	57C10PEST_brp_SNAP_MCFO_X23_0099	20181109_64_G6	Tue Nov 27 17:38:52 EST 2018	Sample#2607424031825068130	f		40x	Gen1 MCFO (40x)	NA
R10G10	attP2	57C10PEST_brp_SNAP_MCFO_X23_0099	20181109_64_H1	Tue Nov 27 17:39:01 EST 2018	Sample#2607424066675540066	f		40x	Gen1 MCFO (40x)	NA
R10G10	attP2	pBPhsFlp2_PEST_brp_SNAP_MCFO_0128	20191022_61_G1	Mon Nov 04 18:08:50 EST 2019	Sample#2731368220442230882	m	40	40x	Gen1 MCFO (40x)	NA
R10G10	attP2	pBPhsFlp2_PEST_brp_SNAP_MCFO_0128	20191022_61_G2	Mon Nov 04 18:08:50 EST 2019	Sample#2731368221348200546	m	40	40x	Gen1 MCFO (40x)	NA
R10G10	attP2	pBPhsFlp2_PEST_brp_SNAP_MCFO_0128	20191022_61_G4	Mon Nov 04 18:08:50 EST 2019	Sample#2731368223063670882	m	40	40x	Gen1 MCFO (40x)	NA
R10G10	attP2	pBPhsFlp2_PEST_brp_SNAP_MCFO_0128	20191022_61_G5	Mon Nov 04 18:08:50 EST 2019	Sample#2731368223898337378	m	40	40x	Gen1 MCFO (40x)	NA
R10G10	attP2	pBPhsFlp2_PEST_brp_SNAP_MCFO_0128	20191022_61_G6	Mon Nov 04 18:08:51 EST 2019	Sample#2731368224741392482	m	40	40x	Gen1 MCFO (40x)	NA
R10G10	attP2	pBPhsFlp2_PEST_brp_SNAP_MCFO_0128	20191022_61_G7	Mon Nov 04 18:08:51 EST 2019	Sample#2731368225584447586	m	40	40x	Gen1 MCFO (40x)	NA
R10H02	attP2	57C10PEST_brp_SNAP_MCFO_X23_0099	20181121_61_B1	Mon Dec 10 13:34:28 EST 2018	Sample#2612073567038210146	f		40x	Gen1 MCFO (40x)	NA
R10H02	attP2	57C10PEST_brp_SNAP_MCFO_X23_0099	20181121_61_B2	Mon Dec 10 13:34:28 EST 2018	Sample#2612073567617024098	f		40x	Gen1 MCFO (40x)	NA
R10H02	attP2	57C10PEST_brp_SNAP_MCFO_X23_0099	20181121_61_B3	Mon Dec 10 13:34:28 EST 2018	Sample#2612073568191643746	f		40x	Gen1 MCFO (40x)	NA
R10H02	attP2	57C10PEST_brp_SNAP_MCFO_X23_0099	20181121_61_B4	Mon Dec 10 13:34:28 EST 2018	Sample#2612073568858538082	f		40x	Gen1 MCFO (40x)	NA
R10H02	attP2	57C10PEST_brp_SNAP_MCFO_X23_0099	20181121_61_B6	Mon Dec 10 13:34:28 EST 2018	Sample#2612073569437352034	f		40x	Gen1 MCFO (40x)	NA
R10H02	attP2	pBPhsFlp2_PEST_brp_SNAP_MCFO_0128	20191011_63_D1	Tue Oct 29 18:29:54 EDT 2019	Sample#2729184095119605858	m	13	40x	Gen1 MCFO (40x)	NA
R10H02	attP2	pBPhsFlp2_PEST_brp_SNAP_MCFO_0128	20191011_63_D2	Tue Oct 29 18:29:54 EDT 2019	Sample#2729184096012992610	m	13	40x	Gen1 MCFO (40x)	NA
R10H02	attP2	pBPhsFlp2_PEST_brp_SNAP_MCFO_0128	20191011_63_D3	Tue Oct 29 18:29:54 EDT 2019	Sample#2729184096910573666	m	13	40x	Gen1 MCFO (40x)	NA
R10H02	attP2	pBPhsFlp2_PEST_brp_SNAP_MCFO_0128	20191011_63_D4	Tue Oct 29 18:29:54 EDT 2019	Sample#2729184097812349026	m	13	40x	Gen1 MCFO (40x)	NA
R10H03	attP2	57C10PEST_brp_SNAP_MCFO_X23_0099	20181113_61_E1	Tue Nov 20 17:21:44 EST 2018	Sample#2604883004899721314	f		40x	Gen1 MCFO (40x)	NA
R10H03	attP2	57C10PEST_brp_SNAP_MCFO_X23_0099	20181113_61_E2	Tue Nov 20 17:21:44 EST 2018	Sample#2604883005499506786	f		40x	Gen1 MCFO (40x)	NA
R10H03	attP2	57C10PEST_brp_SNAP_MCFO_X23_0099	20181113_61_E3	Tue Nov 20 17:21:45 EST 2018	Sample#2604883006044766306	f		40x	Gen1 MCFO (40x)	NA
R10H03	attP2	57C10PEST_brp_SNAP_MCFO_X23_0099	20181113_61_E4	Tue Nov 20 17:21:45 EST 2018	Sample#2604883006539694178	f		40x	Gen1 MCFO (40x)	NA
R10H03	attP2	57C10PEST_brp_SNAP_MCFO_X23_0099	20181113_61_E5	Tue Nov 20 17:21:45 EST 2018	Sample#2604883007009456226	f		40x	Gen1 MCFO (40x)	NA
R10H03	attP2	57C10PEST_brp_SNAP_MCFO_X23_0099	20181113_61_E6	Tue Nov 20 17:21:45 EST 2018	Sample#2604883007546327138	f		40x	Gen1 MCFO (40x)	NA
R10H03	attP2	57C10PEST_brp_SNAP_MCFO_X23_0099	20181113_61_F1	Tue Nov 20 17:21:45 EST 2018	Sample#2604883008079003746	f		40x	Gen1 MCFO (40x)	NA
R10H03	attP2	pBPhsFlp2_PEST_brp_SNAP_MCFO_0128	20191022_61_H1	Mon Nov 04 18:08:51 EST 2019	Sample#2731368226423308386	m	40	40x	Gen1 MCFO (40x)	NA
R10H03	attP2	pBPhsFlp2_PEST_brp_SNAP_MCFO_0128	20191022_61_H2	Mon Nov 04 18:08:51 EST 2019	Sample#2731368227329278050	m	40	40x	Gen1 MCFO (40x)	NA
R10H03	attP2	pBPhsFlp2_PEST_brp_SNAP_MCFO_0128	20191022_61_H3	Mon Nov 04 18:08:51 EST 2019	Sample#2731368228226859106	m	40	40x	Gen1 MCFO (40x)	NA
R10H03	attP2	pBPhsFlp2_PEST_brp_SNAP_MCFO_0128	20191022_61_H4	Mon Nov 04 18:08:52 EST 2019	Sample#2731368229061525602	m	40	40x	Gen1 MCFO (40x)	NA
R10H03	attP2	pBPhsFlp2_PEST_brp_SNAP_MCFO_0128	20191022_61_H5	Mon Nov 04 18:08:52 EST 2019	Sample#2731368229891997794	m	40	40x	Gen1 MCFO (40x)	NA
R10H03	attP2	pBPhsFlp2_PEST_brp_SNAP_MCFO_0128	20191022_61_H6	Mon Nov 04 18:08:52 EST 2019	Sample#2731368230735052898	m	40	40x	Gen1 MCFO (40x)	NA
R10H03	attP2	pBPhsFlp2_PEST_brp_SNAP_MCFO_0128	20191022_61_H7	Mon Nov 04 18:08:52 EST 2019	Sample#2731368231569719394	m	40	40x	Gen1 MCFO (40x)	NA
R10H09	attP2	57C10PEST_brp_SNAP_MCFO_X23_0099	20181121_61_C1	Mon Dec 10 13:34:29 EST 2018	Sample#2612073570011971682	f		40x	Gen1 MCFO (40x)	NA
R10H09	attP2	57C10PEST_brp_SNAP_MCFO_X23_0099	20181121_61_C2	Mon Dec 10 13:34:29 EST 2018	Sample#2612073570586591330	f		40x	Gen1 MCFO (40x)	NA
R10H09	attP2	57C10PEST_brp_SNAP_MCFO_X23_0099	20181121_61_C3	Mon Dec 10 13:34:29 EST 2018	Sample#2612073571089907810	f		40x	Gen1 MCFO (40x)	NA
R10H09	attP2	57C10PEST_brp_SNAP_MCFO_X23_0099	20181121_61_C4	Mon Dec 10 13:34:29 EST 2018	Sample#2612073571681304674	f		40x	Gen1 MCFO (40x)	NA
R10H10	attP2	hsPESTOPT_attP3_3stop1_X_0036	20160513_28_C1	Tue Jun 21 21:13:30 EDT 2016	Sample#2285300132867997770	f	15	20x, 63x	Annotator Gen1 MCFO	Shigehiro Namiki
R10H10	attP2	hsPESTOPT_attP3_3stop1_X_0036	20160513_28_C2	Tue Jun 21 21:13:42 EDT 2016	Sample#2285300179647070282	f	15	20x, 63x	Annotator Gen1 MCFO	Shigehiro Namiki
R10H10	attP2	hsPESTOPT_attP3_3stop1_X_0036	20160513_28_C3	Sun May 22 18:40:27 EDT 2016	Sample#2274389976433033314	f	15	20x	Annotator Gen1 MCFO	Shigehiro Namiki
R10H10	attP2	hsPESTOPT_attP3_3stop1_X_0036	20160513_28_C4	Sun May 22 18:40:27 EDT 2016	Sample#2274389977238339682	f	15	20x	Annotator Gen1 MCFO	Shigehiro Namiki
R10H10	attP2	57C10PEST_brp_SNAP_MCFO_X23_0099	20180828_61_J1	Fri Sep 14 14:04:53 EDT 2018	Sample#2580538379372331106	f		40x	Gen1 MCFO (40x)	NA
R10H10	attP2	57C10PEST_brp_SNAP_MCFO_X23_0099	20180828_61_J2	Fri Sep 14 14:04:53 EDT 2018	Sample#2580538379607212130	f		40x	Gen1 MCFO (40x)	NA
R10H10	attP2	57C10PEST_brp_SNAP_MCFO_X23_0099	20180828_61_J3	Fri Sep 14 14:04:53 EDT 2018	Sample#2580538379888230498	f		40x	Gen1 MCFO (40x)	NA
R10H10	attP2	57C10PEST_brp_SNAP_MCFO_X23_0099	20180828_61_J4	Fri Sep 14 14:04:53 EDT 2018	Sample#2580538380118917218	f		40x	Gen1 MCFO (40x)	NA
R10H10	attP2	57C10PEST_brp_SNAP_MCFO_X23_0099	20180828_61_J5	Fri Sep 14 14:04:53 EDT 2018	Sample#2580538380353798242	f		40x	Gen1 MCFO (40x)	NA
R10H10	attP2	57C10PEST_brp_SNAP_MCFO_X23_0099	20180828_61_J6	Fri Sep 14 14:04:54 EDT 2018	Sample#2580538380613845090	f		40x	Gen1 MCFO (40x)	NA
R11A01	attP2	57C10PEST_attp8_3stop1	20161222_28_G1	Fri Dec 30 13:07:35 EST 2016	Sample#2354771417452511330	f		20x, 63x	Annotator Gen1 MCFO	Gabriella Sterne
R11A01	attP2	57C10PEST_attp8_3stop1	20170217_21_G1	Thu Feb 23 17:10:58 EST 2017	Sample#2374763998957535330	f		20x, 63x	Annotator Gen1 MCFO	Gabriella Sterne
R11A01	attP2	57C10PEST_attp8_3stop1	20170217_21_G2	Thu Feb 23 17:10:58 EST 2017	Sample#2374763999108530274	f		20x, 63x	Annotator Gen1 MCFO	Gabriella Sterne
R11A01	attP2	57C10PEST_attp8_3stop1	20170217_21_G3	Thu Feb 23 17:10:58 EST 2017	Sample#2374763999259525218	f		20x, 63x	Annotator Gen1 MCFO	Gabriella Sterne
R11A01	attP2	57C10PEST_attp8_3stop1	20170217_21_G4	Thu Feb 23 17:10:58 EST 2017	Sample#2374763999406325858	f		20x, 63x	Annotator Gen1 MCFO	Gabriella Sterne
R11A01	attP2	57C10PEST_attp8_3stop1	20170217_21_G6	Thu Feb 23 17:10:58 EST 2017	Sample#2374763999704121442	f		20x, 63x	Annotator Gen1 MCFO	Gabriella Sterne
R11A01	attP2	57C10PEST_attp8_3stop1	20170217_21_G7	Thu Feb 23 17:10:58 EST 2017	Sample#2374763999850922082	f		20x, 63x	Annotator Gen1 MCFO	Gabriella Sterne
R11A01	attP2	57C10PEST_attp8_3stop1	20170217_21_G8	Thu Feb 23 17:10:58 EST 2017	Sample#2374764000001917026	f		20x, 63x	Annotator Gen1 MCFO	Gabriella Sterne
R11A03	attP2	57C10PEST_brp_SNAP_MCFO_X23_0099	20180828_62_A1	Thu Sep 13 18:55:09 EDT 2018	Sample#2580249039756853346	f		40x	Gen1 MCFO (40x)	NA
R11A03	attP2	57C10PEST_brp_SNAP_MCFO_X23_0099	20180828_62_A2	Thu Sep 13 18:55:09 EDT 2018	Sample#2580249040096591970	f		40x	Gen1 MCFO (40x)	NA
R11A03	attP2	57C10PEST_brp_SNAP_MCFO_X23_0099	20180828_62_A3	Thu Sep 13 18:55:09 EDT 2018	Sample#2580249040381804642	f		40x	Gen1 MCFO (40x)	NA
R11A03	attP2	57C10PEST_brp_SNAP_MCFO_X23_0099	20180828_62_A4	Thu Sep 13 18:55:10 EDT 2018	Sample#2580249040667017314	f		40x	Gen1 MCFO (40x)	NA
R11A03	attP2	57C10PEST_brp_SNAP_MCFO_X23_0099	20180828_62_A5	Thu Sep 13 18:55:10 EDT 2018	Sample#2580249040948035682	f		40x	Gen1 MCFO (40x)	NA
R11A03	attP2	57C10PEST_brp_SNAP_MCFO_X23_0099	20180828_62_A6	Thu Sep 13 18:55:10 EDT 2018	Sample#2580249041229054050	f		40x	Gen1 MCFO (40x)	NA
R11A03	attP2	57C10PEST_brp_SNAP_MCFO_X23_0099	20180828_62_B1	Thu Sep 13 18:55:10 EDT 2018	Sample#2580249041505878114	f		40x	Gen1 MCFO (40x)	NA
R11A07	attP2	57C10PEST_attp18_4stop1	20160610_22_C1	Wed Jun 15 15:07:15 EDT 2016	Sample#2283033632304005194	m		20x	Annotator Gen1 MCFO	Ryo Minegishi
R11A07	attP2	57C10PEST_attp18_4stop1	20160610_22_C2	Wed Jun 15 15:07:15 EDT 2016	Sample#2283033634921250890	m		20x, 63x	Annotator Gen1 MCFO	Ryo Minegishi
R11A07	attP2	57C10PEST_attp18_4stop1	20160610_22_C3	Wed Jun 15 15:07:16 EDT 2016	Sample#2283033639291715658	m		20x, 63x	Annotator Gen1 MCFO	Ryo Minegishi
R11A07	attP2	57C10PEST_attp18_4stop1	20160610_22_C4	Wed Jun 15 15:07:16 EDT 2016	Sample#2283033639836975178	m		20x, 63x	Annotator Gen1 MCFO	Ryo Minegishi
R11A07	attP2	57C10PEST_attp18_4stop1	20160610_22_C5	Wed Jun 15 15:07:17 EDT 2016	Sample#2283033640331903050	m		20x, 63x	Annotator Gen1 MCFO	Ryo Minegishi
R11A07	attP2	57C10PEST_attp18_4stop1	20160610_22_C6	Wed Jun 15 15:07:17 EDT 2016	Sample#2283033640860385354	m		20x	Annotator Gen1 MCFO	Ryo Minegishi
R11A07	attP2	57C10PEST_attp18_4stop1	20161223_24_B1	Wed Jan 04 12:34:48 EST 2017	Sample#2356575105313669218	f	15	20x, 63x	Annotator Gen1 MCFO	Masayoshi Ito
R11A07	attP2	57C10PEST_attp18_4stop1	20161223_24_B3	Wed Jan 04 12:34:48 EST 2017	Sample#2356575105456275554	f	15	20x	Annotator Gen1 MCFO	Masayoshi Ito
R11A07	attP2	57C10PEST_attp18_4stop1	20161223_24_B4	Wed Jan 04 12:34:48 EST 2017	Sample#2356575105607270498	f	15	20x	Annotator Gen1 MCFO	Masayoshi Ito
R11A07	attP2	57C10PEST_attp18_4stop1	20161223_24_B5	Wed Jan 04 12:34:48 EST 2017	Sample#2356575105749876834	f	15	20x	Annotator Gen1 MCFO	Masayoshi Ito
R11A07	attP2	57C10PEST_attp18_4stop1	20161223_24_B6	Fri Jan 06 11:23:08 EST 2017	Sample#2357281846431055970	f	15	20x, 63x	Annotator Gen1 MCFO	Masayoshi Ito
R11A07	attP2	57C10PEST_attp18_4stop1	20161223_24_B7	Fri Jan 06 11:23:08 EST 2017	Sample#2357281846623993954	f	15	20x, 63x	Annotator Gen1 MCFO	Masayoshi Ito
R11A07	attP2	57C10PEST_attp18_4stop1	20161223_24_B8	Fri Jan 06 11:23:08 EST 2017	Sample#2357281846795960418	f	15	20x	Annotator Gen1 MCFO	Masayoshi Ito
R11A07	attP2	57C10PEST_attp18_4stop1	20161223_24_C1	Mon Jan 09 10:46:39 EST 2017	Sample#2358359827572326498	f	15	20x	Annotator Gen1 MCFO	Masayoshi Ito
R11A07	attP2	57C10PEST_brp_SNAP_MCFO_X23_0099	20180828_62_C1	Thu Sep 13 18:55:10 EDT 2018	Sample#2580249041791090786	f		40x	Gen1 MCFO (40x)	NA
R11A07	attP2	57C10PEST_brp_SNAP_MCFO_X23_0099	20180828_62_C2	Thu Sep 13 18:55:10 EDT 2018	Sample#2580249042072109154	f		40x	Gen1 MCFO (40x)	NA
R11A07	attP2	57C10PEST_brp_SNAP_MCFO_X23_0099	20180828_62_C3	Thu Sep 13 18:55:10 EDT 2018	Sample#2580249042353127522	f		40x	Gen1 MCFO (40x)	NA
R11A07	attP2	57C10PEST_brp_SNAP_MCFO_X23_0099	20180828_62_C4	Thu Sep 13 18:55:10 EDT 2018	Sample#2580249042634145890	f		40x	Gen1 MCFO (40x)	NA
R11A07	attP2	57C10PEST_brp_SNAP_MCFO_X23_0099	20180828_62_C5	Thu Sep 13 18:55:10 EDT 2018	Sample#2580249042910969954	f		40x	Gen1 MCFO (40x)	NA
R11A07	attP2	57C10PEST_brp_SNAP_MCFO_X23_0099	20180828_62_C6	Thu Sep 13 18:55:10 EDT 2018	Sample#2580249043187794018	f		40x	Gen1 MCFO (40x)	NA
R11A07	attP2	pBPhsFlp2_PEST_brp_SNAP_MCFO_0128	20191203_65_L2	Thu Dec 19 17:17:24 EST 2019	Sample#2747662730902110306	m	40	40x	Gen1 MCFO (40x)	NA
R11A07	attP2	pBPhsFlp2_PEST_brp_SNAP_MCFO_0128	20191203_65_L3	Thu Dec 19 17:17:24 EST 2019	Sample#2747662731971657826	m	40	40x	Gen1 MCFO (40x)	NA
R11A07	attP2	pBPhsFlp2_PEST_brp_SNAP_MCFO_0128	20191203_65_L4	Thu Dec 19 17:17:24 EST 2019	Sample#2747662733049593954	m	40	40x	Gen1 MCFO (40x)	NA
R11A07	attP2	pBPhsFlp2_PEST_brp_SNAP_MCFO_0128	20191203_65_L5	Thu Dec 19 17:17:24 EST 2019	Sample#2747662734056226914	m	40	40x	Gen1 MCFO (40x)	NA
R11A07	attP2	pBPhsFlp2_PEST_brp_SNAP_MCFO_0128	20191203_65_L6	Thu Dec 19 17:17:25 EST 2019	Sample#2747662735075442786	m	40	40x	Gen1 MCFO (40x)	NA
R11A07	attP2	pBPhsFlp2_PEST_brp_SNAP_MCFO_0128	20191203_65_L7	Thu Dec 19 17:17:25 EST 2019	Sample#2747662736098852962	m	40	40x	Gen1 MCFO (40x)	NA
R11A07	attP2	pBPhsFlp2_PEST_brp_SNAP_MCFO_0128	20191203_65_L8	Thu Dec 19 17:17:25 EST 2019	Sample#2747662737122263138	m	40	40x	Gen1 MCFO (40x)	NA
R11B03	attP2	57C10PEST_brp_SNAP_MCFO_X23_0099	20181121_61_D1	Mon Dec 10 13:34:29 EST 2018	Sample#2612073572264312930	f		40x	Gen1 MCFO (40x)	NA
R11B03	attP2	57C10PEST_brp_SNAP_MCFO_X23_0099	20181121_61_D2	Mon Dec 10 13:34:29 EST 2018	Sample#2612073572843126882	f		40x	Gen1 MCFO (40x)	NA
R11B03	attP2	57C10PEST_brp_SNAP_MCFO_X23_0099	20181121_61_D3	Mon Dec 10 13:34:29 EST 2018	Sample#2612073573413552226	f		40x	Gen1 MCFO (40x)	NA
R11B03	attP2	57C10PEST_brp_SNAP_MCFO_X23_0099	20181121_61_D4	Mon Dec 10 13:34:30 EST 2018	Sample#2612073573988171874	f		40x	Gen1 MCFO (40x)	NA
R11B03	attP2	57C10PEST_brp_SNAP_MCFO_X23_0099	20181121_61_D5	Mon Dec 10 13:34:30 EST 2018	Sample#2612073574566985826	f		40x	Gen1 MCFO (40x)	NA
R11B03	attP2	57C10PEST_brp_SNAP_MCFO_X23_0099	20181121_61_D6	Mon Dec 10 13:34:30 EST 2018	Sample#2612073575489732706	f		40x	Gen1 MCFO (40x)	NA
R11B03	attP2	pBPhsFlp2_PEST_brp_SNAP_MCFO_0128	20191022_63_F1	Mon Nov 04 18:58:02 EST 2019	Sample#2731380604074459234	m	40	40x	Gen1 MCFO (40x)	NA
R11B03	attP2	pBPhsFlp2_PEST_brp_SNAP_MCFO_0128	20191022_63_F2	Mon Nov 04 18:58:02 EST 2019	Sample#2731380605001400418	m	40	40x	Gen1 MCFO (40x)	NA
R11B03	attP2	pBPhsFlp2_PEST_brp_SNAP_MCFO_0128	20191022_63_F3	Mon Nov 04 18:58:03 EST 2019	Sample#2731380605852844130	m	40	40x	Gen1 MCFO (40x)	NA
R11B03	attP2	pBPhsFlp2_PEST_brp_SNAP_MCFO_0128	20191022_63_F4	Mon Nov 04 18:58:03 EST 2019	Sample#2731380606708482146	m	40	40x	Gen1 MCFO (40x)	NA
R11B03	attP2	pBPhsFlp2_PEST_brp_SNAP_MCFO_0128	20191022_63_F5	Mon Nov 04 18:58:03 EST 2019	Sample#2731380607564120162	m	40	40x	Gen1 MCFO (40x)	NA
R11B03	attP2	pBPhsFlp2_PEST_brp_SNAP_MCFO_0128	20191022_63_F6	Mon Nov 04 18:58:03 EST 2019	Sample#2731380608411369570	m	40	40x	Gen1 MCFO (40x)	NA
R11B03	attP2	pBPhsFlp2_PEST_brp_SNAP_MCFO_0128	20191022_63_F7	Mon Nov 04 18:58:03 EST 2019	Sample#2731380609271201890	m	40	40x	Gen1 MCFO (40x)	NA
R11B03	attP2	pBPhsFlp2_PEST_brp_SNAP_MCFO_0128	20191022_63_K2	Mon Nov 04 17:18:41 EST 2019	Sample#2731355601140449378	m	40	40x	Gen1 MCFO (40x)	NA
R11B04	attP2	57C10PEST_brp_SNAP_MCFO_X23_0099	20181121_61_E1	Mon Dec 10 13:34:30 EST 2018	Sample#2612073576089518178	f		40x	Gen1 MCFO (40x)	NA
R11B04	attP2	57C10PEST_brp_SNAP_MCFO_X23_0099	20181121_61_E2	Mon Dec 10 13:34:30 EST 2018	Sample#2612073576672526434	f		40x	Gen1 MCFO (40x)	NA
R11B04	attP2	57C10PEST_brp_SNAP_MCFO_X23_0099	20181121_61_E3	Mon Dec 10 13:34:30 EST 2018	Sample#2612073577263923298	f		40x	Gen1 MCFO (40x)	NA
R11B04	attP2	57C10PEST_brp_SNAP_MCFO_X23_0099	20181121_61_E4	Mon Dec 10 13:34:30 EST 2018	Sample#2612073577943400546	f		40x	Gen1 MCFO (40x)	NA
R11B04	attP2	57C10PEST_brp_SNAP_MCFO_X23_0099	20181121_61_E5	Mon Dec 10 13:34:31 EST 2018	Sample#2612073578534797410	f		40x	Gen1 MCFO (40x)	NA
R11B04	attP2	57C10PEST_brp_SNAP_MCFO_X23_0099	20181121_61_E6	Mon Dec 10 13:34:31 EST 2018	Sample#2612073579155554402	f		40x	Gen1 MCFO (40x)	NA
R11B04	attP2	pBPhsFlp2_PEST_brp_SNAP_MCFO_0128	20191015_61_A1	Fri Oct 25 16:39:27 EDT 2019	Sample#2727706748667297890	m	13	40x	Gen1 MCFO (40x)	NA
R11B04	attP2	pBPhsFlp2_PEST_brp_SNAP_MCFO_0128	20191015_61_A2	Fri Oct 25 16:39:27 EDT 2019	Sample#2727706749564878946	m	13	40x	Gen1 MCFO (40x)	NA
R11B04	attP2	pBPhsFlp2_PEST_brp_SNAP_MCFO_0128	20191015_61_A3	Fri Oct 25 16:39:27 EDT 2019	Sample#2727706750454071394	m	13	40x	Gen1 MCFO (40x)	NA
R11B04	attP2	pBPhsFlp2_PEST_brp_SNAP_MCFO_0128	20191015_61_A4	Fri Oct 25 16:39:27 EDT 2019	Sample#2727706751351652450	m	13	40x	Gen1 MCFO (40x)	NA
R11B04	attP2	pBPhsFlp2_PEST_brp_SNAP_MCFO_0128	20191015_61_A5	Fri Oct 25 16:39:28 EDT 2019	Sample#2727706752173736034	m	13	40x	Gen1 MCFO (40x)	NA
R11B04	attP2	pBPhsFlp2_PEST_brp_SNAP_MCFO_0128	20191015_61_A6	Fri Oct 25 16:39:28 EDT 2019	Sample#2727706752991625314	m	13	40x	Gen1 MCFO (40x)	NA
R11B04	attP2	pBPhsFlp2_PEST_brp_SNAP_MCFO_0128	20191015_61_A7	Fri Oct 25 16:39:28 EDT 2019	Sample#2727706753813708898	m	13	40x	Gen1 MCFO (40x)	NA
R11B04	attP2	pBPhsFlp2_PEST_brp_SNAP_MCFO_0128	20191015_61_A8	Fri Oct 25 16:39:28 EDT 2019	Sample#2727706754635792482	m	13	40x	Gen1 MCFO (40x)	NA
R11B07	attP2	57C10PEST_brp_SNAP_MCFO_X23_0099	20180828_62_D2	Thu Sep 13 18:55:10 EDT 2018	Sample#2580249043414286434	f		40x	Gen1 MCFO (40x)	NA
R11B07	attP2	57C10PEST_brp_SNAP_MCFO_X23_0099	20180828_62_D3	Thu Sep 13 18:55:10 EDT 2018	Sample#2580249043695304802	f		40x	Gen1 MCFO (40x)	NA
R11B07	attP2	57C10PEST_brp_SNAP_MCFO_X23_0099	20180828_62_D4	Thu Sep 13 18:55:10 EDT 2018	Sample#2580249043976323170	f		40x	Gen1 MCFO (40x)	NA
R11B07	attP2	57C10PEST_brp_SNAP_MCFO_X23_0099	20180828_62_D6	Tue Jan 08 11:07:42 EST 2019	Sample#2622545882486145122	f		40x	Gen1 MCFO (40x)	NA
R11B07	attP2	pBPhsFlp2_PEST_brp_SNAP_MCFO_0128	20191203_66_A1	Tue Dec 24 13:43:27 EST 2019	Sample#2749420830575296610	m	40	40x	Gen1 MCFO (40x)	NA
R11B07	attP2	pBPhsFlp2_PEST_brp_SNAP_MCFO_0128	20191203_66_A2	Tue Dec 24 13:43:28 EST 2019	Sample#2749420831695175778	m	40	40x	Gen1 MCFO (40x)	NA
R11B07	attP2	pBPhsFlp2_PEST_brp_SNAP_MCFO_0128	20191203_66_A3	Tue Dec 24 13:43:28 EST 2019	Sample#2749420832798277730	m	40	40x	Gen1 MCFO (40x)	NA
R11B07	attP2	pBPhsFlp2_PEST_brp_SNAP_MCFO_0128	20191203_66_A4	Tue Dec 24 13:43:28 EST 2019	Sample#2749420833830076514	m	40	40x	Gen1 MCFO (40x)	NA
R11B07	attP2	pBPhsFlp2_PEST_brp_SNAP_MCFO_0128	20191203_66_A5	Tue Dec 24 13:43:28 EST 2019	Sample#2749420834866069602	m	40	40x	Gen1 MCFO (40x)	NA
R11B07	attP2	pBPhsFlp2_PEST_brp_SNAP_MCFO_0128	20191203_66_A6	Tue Dec 24 13:43:29 EST 2019	Sample#2749420835906256994	m	40	40x	Gen1 MCFO (40x)	NA
R11B09	attP2	57C10PEST_brp_SNAP_MCFO_X23_0099	20180828_62_E1	Tue Jan 08 11:07:43 EST 2019	Sample#2622545883073347682	f		40x	Gen1 MCFO (40x)	NA
R11B09	attP2	57C10PEST_brp_SNAP_MCFO_X23_0099	20180828_62_E2	Tue Jan 08 11:07:43 EST 2019	Sample#2622545883668938850	f		40x	Gen1 MCFO (40x)	NA
R11B09	attP2	57C10PEST_brp_SNAP_MCFO_X23_0099	20180828_62_E3	Tue Jan 08 11:07:43 EST 2019	Sample#2622545884306473058	f		40x	Gen1 MCFO (40x)	NA
R11B09	attP2	57C10PEST_brp_SNAP_MCFO_X23_0099	20180828_62_E4	Tue Jan 08 11:07:43 EST 2019	Sample#2622545884906258530	f		40x	Gen1 MCFO (40x)	NA
R11B09	attP2	57C10PEST_brp_SNAP_MCFO_X23_0099	20180828_62_E5	Thu Sep 13 18:55:10 EDT 2018	Sample#2580249044257341538	f		40x	Gen1 MCFO (40x)	NA
R11B09	attP2	57C10PEST_brp_SNAP_MCFO_X23_0099	20180828_62_E6	Thu Sep 13 18:55:10 EDT 2018	Sample#2580249044538359906	f		40x	Gen1 MCFO (40x)	NA
R11B11	attP2	57C10PEST_attp8_3stop1	20170217_21_H1	Thu Feb 23 17:10:58 EST 2017	Sample#2374764000148717666	f		20x, 63x	Annotator Gen1 MCFO	Gabriella Sterne
R11B11	attP2	57C10PEST_attp8_3stop1	20170217_21_H2	Thu Feb 23 17:10:58 EST 2017	Sample#2374764000299712610	f		20x	Annotator Gen1 MCFO	Gabriella Sterne
R11B11	attP2	57C10PEST_attp8_3stop1	20170217_21_H3	Thu Feb 23 17:10:58 EST 2017	Sample#2374764000446513250	f		20x, 63x	Annotator Gen1 MCFO	Gabriella Sterne
R11B11	attP2	57C10PEST_attp8_3stop1	20170217_21_H4	Thu Feb 23 17:10:58 EST 2017	Sample#2374764000597508194	f		20x	Annotator Gen1 MCFO	Gabriella Sterne
R11B11	attP2	57C10PEST_attp8_3stop1	20170217_21_H5	Thu Feb 23 17:10:58 EST 2017	Sample#2374764000748503138	f		20x, 63x	Annotator Gen1 MCFO	Gabriella Sterne
R11B11	attP2	57C10PEST_attp8_3stop1	20170217_21_H6	Thu Feb 23 17:10:58 EST 2017	Sample#2374764000895303778	f		20x, 63x	Annotator Gen1 MCFO	Gabriella Sterne
R11B11	attP2	57C10PEST_attp8_3stop1	20170217_21_H7	Thu Feb 23 17:10:58 EST 2017	Sample#2374764001046298722	f		20x, 63x	Annotator Gen1 MCFO	Gabriella Sterne
R11B11	attP2	57C10wt_attp8_3stop1	20130605_1_H6	Thu Apr 24 20:10:02 EDT 2014	Sample#1999360135071268962	f		20x	Annotator Gen1 MCFO	Tanya Wolff
R11B11	attP2	57C10wt_attp8_3stop1	20130605_1_I1	Thu Apr 24 20:10:02 EDT 2014	Sample#1999360135717191778	f		20x	Annotator Gen1 MCFO	Tanya Wolff
R11B11	attP2	57C10wt_attp8_3stop1	20130605_1_I2	Thu Apr 24 20:10:02 EDT 2014	Sample#1999360136308588642	f		20x	Annotator Gen1 MCFO	Tanya Wolff
R11B11	attP2	57C10wt_attp8_3stop1	20130605_1_I3	Thu Apr 24 20:10:02 EDT 2014	Sample#1999360137017426018	f		20x	Annotator Gen1 MCFO	Tanya Wolff
R11B11	attP2	57C10wt_attp8_3stop1	20130605_1_I4	Thu Apr 24 20:10:03 EDT 2014	Sample#1999360137663348834	f		20x	Annotator Gen1 MCFO	Tanya Wolff
R11B11	attP2	57C10wt_attp8_3stop1	20130605_1_I5	Thu Apr 24 20:10:03 EDT 2014	Sample#1999360138300883042	f		20x	Annotator Gen1 MCFO	Tanya Wolff
R11B11	attP2	57C10wt_attp8_3stop1	20130605_1_I6	Thu Apr 24 20:10:03 EDT 2014	Sample#1999360138992943202	f		20x	Annotator Gen1 MCFO	Tanya Wolff
R11B11	attP2	57C10wt_attp8_3stop1	20130605_1_J1	Thu Apr 24 20:10:03 EDT 2014	Sample#1999360139651448930	f		20x	Annotator Gen1 MCFO	Tanya Wolff
R11B11	attP2	57C10wt_attp8_3stop1	20130605_1_J2	Thu Apr 24 20:10:03 EDT 2014	Sample#1999360140293177442	f		20x	Annotator Gen1 MCFO	Tanya Wolff
R11B11	attP2	57C10wt_attp8_3stop1	20130605_1_J3	Thu Apr 24 20:10:03 EDT 2014	Sample#1999360140943294562	f		20x	Annotator Gen1 MCFO	Tanya Wolff
R11B11	attP2	57C10wt_attp8_3stop1	20130605_1_J4	Thu Apr 24 20:10:04 EDT 2014	Sample#1999360141618577506	f		20x	Annotator Gen1 MCFO	Tanya Wolff
R11B11	attP2	57C10wt_attp8_3stop1	20130610_3_D6	Thu Mar 13 18:06:10 EDT 2014	Sample#1984108672912982114	f		20x	Annotator Gen1 MCFO	Tanya Wolff
R11B11	attP2	57C10wt_attp8_3stop1	20130610_3_E2	Thu Mar 13 18:06:11 EDT 2014	Sample#1984108674901082210	f		20x	Annotator Gen1 MCFO	Tanya Wolff
R11B11	attP2	57C10wt_attp8_3stop1	20130610_3_E3	Thu Mar 13 18:06:11 EDT 2014	Sample#1984108675861577826	f		20x	Annotator Gen1 MCFO	Tanya Wolff
R11B11	attP2	57C10wt_attp8_3stop1	20130610_3_E4	Thu Mar 13 18:06:11 EDT 2014	Sample#1984108676654301282	f		20x	Annotator Gen1 MCFO	Tanya Wolff
R11B11	attP2	57C10wt_attp8_3stop1	20130610_3_E5	Thu Mar 13 18:06:11 EDT 2014	Sample#1984108677618991202	f		20x	Annotator Gen1 MCFO	Tanya Wolff
R11B11	attP2	57C10wt_attp8_3stop1	20130610_3_E6	Thu Mar 13 18:06:12 EDT 2014	Sample#1984108680924102754	f		20x	Annotator Gen1 MCFO	Tanya Wolff
R11B11	attP2	57C10wt_attp8_3stop1	20130610_3_F1	Thu Mar 13 18:06:12 EDT 2014	Sample#1984108681305784418	f		20x	Annotator Gen1 MCFO	Tanya Wolff
R11B11	attP2	hsPESTOPT_attP3_3stop1_X_0036	20160513_28_D1	Tue Jun 21 21:13:49 EDT 2016	Sample#2285300209598595146	f	15	20x, 63x	Annotator Gen1 MCFO	Shigehiro Namiki
R11B11	attP2	hsPESTOPT_attP3_3stop1_X_0036	20160513_28_D2	Tue Jun 21 21:14:17 EDT 2016	Sample#2285300329417277514	f	15	20x, 63x	Annotator Gen1 MCFO	Shigehiro Namiki
R11B11	attP2	hsPESTOPT_attP3_3stop1_X_0036	20160513_28_D3	Tue Jun 21 21:14:18 EDT 2016	Sample#2285300332261015626	f	15	20x, 63x	Annotator Gen1 MCFO	Shigehiro Namiki
R11B11	attP2	hsPESTOPT_attP3_3stop1_X_0036	20160513_28_D4	Sun May 22 18:40:27 EDT 2016	Sample#2274389980413427810	f	15	20x	Annotator Gen1 MCFO	Shigehiro Namiki
R11B11	attP2	hsPESTOPT_attP3_3stop1_X_0036	20160513_28_D5	Tue Jun 21 21:14:46 EDT 2016	Sample#2285300448569065546	f	15	20x, 63x	Annotator Gen1 MCFO	Shigehiro Namiki
R11B11	attP2	hsPESTOPT_attP3_3stop1_X_0036	20160513_28_D6	Tue Jun 21 21:15:15 EDT 2016	Sample#2285300573144088650	f	15	20x, 63x	Annotator Gen1 MCFO	Shigehiro Namiki
R11B11	attP2	57C10PEST_brp_SNAP_MCFO_X23_0099	20180828_62_F1	Thu Sep 13 18:55:10 EDT 2018	Sample#2580249044819378274	f		40x	Gen1 MCFO (40x)	NA
R11B11	attP2	57C10PEST_brp_SNAP_MCFO_X23_0099	20180828_62_F2	Thu Sep 13 18:55:11 EDT 2018	Sample#2580249045100396642	f		40x	Gen1 MCFO (40x)	NA
R11B11	attP2	57C10PEST_brp_SNAP_MCFO_X23_0099	20180828_62_F3	Thu Sep 13 18:55:11 EDT 2018	Sample#2580249045381415010	f		40x	Gen1 MCFO (40x)	NA
R11B11	attP2	57C10PEST_brp_SNAP_MCFO_X23_0099	20180828_62_F4	Thu Sep 13 18:55:11 EDT 2018	Sample#2580249045666627682	f		40x	Gen1 MCFO (40x)	NA
R11B11	attP2	57C10PEST_brp_SNAP_MCFO_X23_0099	20180828_62_F5	Thu Sep 13 18:55:11 EDT 2018	Sample#2580249045943451746	f		40x	Gen1 MCFO (40x)	NA
R11B11	attP2	57C10PEST_brp_SNAP_MCFO_X23_0099	20180828_62_F6	Thu Sep 13 18:55:11 EDT 2018	Sample#2580249046228664418	f		40x	Gen1 MCFO (40x)	NA
R11B12	attP2	57C10PEST_brp_SNAP_MCFO_X23_0099	20181121_61_F1	Mon Dec 10 13:34:31 EST 2018	Sample#2612073579994415202	f		40x	Gen1 MCFO (40x)	NA
R11B12	attP2	57C10PEST_brp_SNAP_MCFO_X23_0099	20181121_61_F2	Mon Dec 10 13:34:31 EST 2018	Sample#2612073580598394978	f		40x	Gen1 MCFO (40x)	NA
R11B12	attP2	57C10PEST_brp_SNAP_MCFO_X23_0099	20181121_61_F3	Mon Dec 10 13:34:31 EST 2018	Sample#2612073581168820322	f		40x	Gen1 MCFO (40x)	NA
R11B12	attP2	57C10PEST_brp_SNAP_MCFO_X23_0099	20181121_61_F4	Mon Dec 10 13:34:31 EST 2018	Sample#2612073581743439970	f		40x	Gen1 MCFO (40x)	NA
R11B12	attP2	57C10PEST_brp_SNAP_MCFO_X23_0099	20181121_61_F5	Mon Dec 10 13:34:32 EST 2018	Sample#2612073582313865314	f		40x	Gen1 MCFO (40x)	NA
R11B12	attP2	57C10PEST_brp_SNAP_MCFO_X23_0099	20181121_61_F6	Mon Dec 10 13:34:32 EST 2018	Sample#2612073582880096354	f		40x	Gen1 MCFO (40x)	NA
R11C01	attP2	57C10wt_attp8_3stop1	20130612_1_B3	Sun Jul 06 14:13:20 EDT 2014	Sample#2025724681209774178	f		20x	Annotator Gen1 MCFO	Tanya Wolff
R11C01	attP2	57C10wt_attp8_3stop1	20130612_1_B4	Sun Jul 06 14:13:20 EDT 2014	Sample#2025724682631643234	f		20x	Annotator Gen1 MCFO	Tanya Wolff
R11C01	attP2	57C10wt_attp8_3stop1	20130612_1_B5	Sun Jul 06 14:13:20 EDT 2014	Sample#2025724683969626210	f		20x	Annotator Gen1 MCFO	Tanya Wolff
R11C01	attP2	57C10wt_attp8_3stop1	20130612_1_B6	Sun Jul 06 14:13:21 EDT 2014	Sample#2025724685370523746	f		20x	Annotator Gen1 MCFO	Tanya Wolff
R11C01	attP2	57C10wt_attp8_3stop1	20130612_1_C1	Sun Jul 06 14:13:21 EDT 2014	Sample#2025724686633009250	f		20x	Annotator Gen1 MCFO	Tanya Wolff
R11C01	attP2	57C10wt_attp8_3stop1	20130612_1_C2	Sun Jul 06 14:13:21 EDT 2014	Sample#2025724688012935266	f		20x	Annotator Gen1 MCFO	Tanya Wolff
R11C01	attP2	57C10wt_attp8_3stop1	20130612_1_C3	Sun Jul 06 14:13:22 EDT 2014	Sample#2025724689359306850	f		20x	Annotator Gen1 MCFO	Tanya Wolff
R11C01	attP2	57C10wt_attp8_3stop1	20130612_1_C5	Sun Jul 06 14:13:22 EDT 2014	Sample#2025724692110770274	f		20x	Annotator Gen1 MCFO	Tanya Wolff
R11C01	attP2	57C10PEST_brp_SNAP_MCFO_X23_0099	20181221_63_C1	Tue Jan 22 15:27:03 EST 2019	Sample#2627684579057598562	f		40x	Gen1 MCFO (40x)	NA
R11C01	attP2	57C10PEST_brp_SNAP_MCFO_X23_0099	20181221_63_C2	Tue Jan 22 15:27:03 EST 2019	Sample#2627684579665772642	f		40x	Gen1 MCFO (40x)	NA
R11C01	attP2	57C10PEST_brp_SNAP_MCFO_X23_0099	20181221_63_C3	Tue Jan 22 15:27:03 EST 2019	Sample#2627684580278141026	f		40x	Gen1 MCFO (40x)	NA
R11C01	attP2	57C10PEST_brp_SNAP_MCFO_X23_0099	20181221_63_C4	Tue Jan 22 15:27:04 EST 2019	Sample#2627684580894703714	f		40x	Gen1 MCFO (40x)	NA
R11C01	attP2	57C10PEST_brp_SNAP_MCFO_X23_0099	20181221_63_C5	Tue Jan 22 15:27:04 EST 2019	Sample#2627684581515460706	f		40x	Gen1 MCFO (40x)	NA
R11C01	attP2	57C10PEST_brp_SNAP_MCFO_X23_0099	20181221_63_C6	Tue Jan 22 15:27:04 EST 2019	Sample#2627684582127829090	f		40x	Gen1 MCFO (40x)	NA
R11C01	attP2	57C10PEST_brp_SNAP_MCFO_X23_0099	20181221_63_D1	Tue Jan 22 15:27:04 EST 2019	Sample#2627684582752780386	f		40x	Gen1 MCFO (40x)	NA
R11C01	attP2	pBPhsFlp2_PEST_brp_SNAP_MCFO_0128	20190723_61_E1	Thu Aug 08 14:43:11 EDT 2019	Sample#2699411235455107170	m	40	40x	Gen1 MCFO (40x)	NA
R11C01	attP2	pBPhsFlp2_PEST_brp_SNAP_MCFO_0128	20190723_61_E2	Thu Aug 08 14:43:11 EDT 2019	Sample#2699411235954229346	m	40	40x	Gen1 MCFO (40x)	NA
R11C01	attP2	pBPhsFlp2_PEST_brp_SNAP_MCFO_0128	20190723_61_E3	Thu Aug 08 14:43:11 EDT 2019	Sample#2699411236461740130	m	40	40x	Gen1 MCFO (40x)	NA
R11C01	attP2	pBPhsFlp2_PEST_brp_SNAP_MCFO_0128	20190723_61_E4	Thu Aug 08 14:43:11 EDT 2019	Sample#2699411236906336354	m	40	40x	Gen1 MCFO (40x)	NA
R11C01	attP2	pBPhsFlp2_PEST_brp_SNAP_MCFO_0128	20190723_61_E5	Thu Aug 08 14:43:11 EDT 2019	Sample#2699411237355126882	m	40	40x	Gen1 MCFO (40x)	NA
R11C01	attP2	pBPhsFlp2_PEST_brp_SNAP_MCFO_0128	20190723_61_E6	Thu Aug 08 14:43:11 EDT 2019	Sample#2699411237808111714	m	40	40x	Gen1 MCFO (40x)	NA
R11C04	attP2	57C10PEST_attp18_4stop1	20170324_23_D1	Sun Apr 02 14:09:56 EDT 2017	Sample#2388474080174014562	f		20x	Annotator Gen1 MCFO	Jens Goldammer
R11C04	attP2	57C10PEST_attp18_4stop1	20170324_23_D2	Sun Apr 02 14:09:56 EDT 2017	Sample#2388474080345981026	f		20x	Annotator Gen1 MCFO	Jens Goldammer
R11C04	attP2	57C10PEST_attp18_4stop1	20170324_23_D3	Sun Apr 02 14:09:56 EDT 2017	Sample#2388474080517947490	f		20x	Annotator Gen1 MCFO	Jens Goldammer
R11C04	attP2	57C10PEST_attp18_4stop1	20170324_23_D4	Sun Apr 02 14:09:56 EDT 2017	Sample#2388474080689913954	f		20x, 63x	Annotator Gen1 MCFO	Jens Goldammer
R11C04	attP2	57C10PEST_attp18_4stop1	20170324_23_D5	Sun Apr 02 14:09:56 EDT 2017	Sample#2388474080857686114	f		20x, 63x	Annotator Gen1 MCFO	Jens Goldammer
R11C04	attP2	57C10PEST_attp18_4stop1	20170324_23_D6	Sun Apr 02 14:09:56 EDT 2017	Sample#2388474081029652578	f		20x	Annotator Gen1 MCFO	Jens Goldammer
R11C04	attP2	57C10PEST_attp18_4stop1	20170324_23_D7	Sun Apr 02 14:09:56 EDT 2017	Sample#2388474081201619042	f		20x, 63x	Annotator Gen1 MCFO	Jens Goldammer
R11C04	attP2	57C10PEST_attp18_4stop1	20170324_23_D8	Sun Apr 02 14:09:56 EDT 2017	Sample#2388474081373585506	f		20x	Annotator Gen1 MCFO	Jens Goldammer
R11C04	attP2	57C10PEST_attp18_4stop1	20170324_23_E1	Sun Apr 02 14:09:56 EDT 2017	Sample#2388474081545551970	f		20x	Annotator Gen1 MCFO	Jens Goldammer
R11C05	attP2	57C10wt_attp8_3stop1	20130606_3_A1	Thu Apr 24 20:10:04 EDT 2014	Sample#1999360142604238946	f		20x	Annotator Gen1 MCFO	Tanya Wolff
R11C05	attP2	57C10wt_attp8_3stop1	20130606_3_A3	Thu Apr 24 20:10:04 EDT 2014	Sample#1999360143346630754	f		20x	Annotator Gen1 MCFO	Tanya Wolff
R11C05	attP2	57C10wt_attp8_3stop1	20130606_3_A4	Thu Apr 24 20:10:04 EDT 2014	Sample#1999360144193880162	f		20x	Annotator Gen1 MCFO	Tanya Wolff
R11C05	attP2	57C10wt_attp8_3stop1	20130606_3_A5	Thu Apr 24 20:10:04 EDT 2014	Sample#1999360145057906786	f		20x	Annotator Gen1 MCFO	Tanya Wolff
R11C05	attP2	57C10wt_attp8_3stop1	20130606_3_A6	Thu Apr 24 20:10:05 EDT 2014	Sample#1999360145812881506	f		20x	Annotator Gen1 MCFO	Tanya Wolff
R11C05	attP2	57C10wt_attp8_3stop1	20130606_3_B1	Thu Apr 24 20:10:05 EDT 2014	Sample#1999360146764988514	f		20x	Annotator Gen1 MCFO	Tanya Wolff
R11C05	attP2	57C10wt_attp8_3stop1	20130606_3_B2	Thu Apr 24 20:10:05 EDT 2014	Sample#1999360147452854370	f		20x	Annotator Gen1 MCFO	Tanya Wolff
R11C05	attP2	57C10wt_attp8_3stop1	20130606_3_B3	Thu Apr 24 20:10:05 EDT 2014	Sample#1999360148287520866	f		20x	Annotator Gen1 MCFO	Tanya Wolff
R11C05	attP2	hsPESTOPT_attP3_3stop1_X_0036	20140307_32_E1	Tue May 27 18:32:25 EDT 2014	Sample#2011294369826472034	f		20x, 63x	Annotator Gen1 MCFO	Aljoscha Nern
R11C05	attP2	hsPESTOPT_attP3_3stop1_X_0036	20140307_32_E2	Tue May 27 18:33:10 EDT 2014	Sample#2011294558863753314	f		20x, 63x	Annotator Gen1 MCFO	Aljoscha Nern
R11C05	attP2	hsPESTOPT_attP3_3stop1_X_0036	20140307_32_E3	Tue May 27 18:34:00 EDT 2014	Sample#2011294767857533026	f		20x, 63x	Annotator Gen1 MCFO	Aljoscha Nern
R11C05	attP2	hsPESTOPT_attP3_3stop1_X_0036	20140307_32_E4	Tue May 27 18:34:22 EDT 2014	Sample#2011294857384951906	f		20x, 63x	Annotator Gen1 MCFO	Aljoscha Nern
R11C05	attP2	hsPESTOPT_attP3_3stop1_X_0036	20140307_32_E5	Tue May 27 18:34:44 EDT 2014	Sample#2011294949680611426	f		20x, 63x	Annotator Gen1 MCFO	Aljoscha Nern
R11C05	attP2	hsPESTOPT_attP3_3stop1_X_0036	20140307_32_E6	Tue May 27 18:35:30 EDT 2014	Sample#2011295144589918306	f		20x, 63x	Annotator Gen1 MCFO	Aljoscha Nern
R11C05	attP2	hsPESTOPT_attP3_3stop1_X_0036	20140307_32_E7	Tue May 27 18:36:12 EDT 2014	Sample#2011295321019121762	f		20x, 63x	Annotator Gen1 MCFO	Aljoscha Nern
R11C05	attP2	hsPESTOPT_attP3_3stop1_X_0036	20140312_19_D1	Sat May 03 16:08:54 EDT 2014	Sample#2002560943732555874	f		20x, 63x	Annotator Gen1 MCFO	Aljoscha Nern
R11C05	attP2	hsPESTOPT_attP3_3stop1_X_0036	20140312_19_D3	Sat May 03 16:08:59 EDT 2014	Sample#2002560964834099298	f		20x, 63x	Annotator Gen1 MCFO	Aljoscha Nern
R11C05	attP2	hsPESTOPT_attP3_3stop1_X_0036	20140312_19_D4	Sat May 03 16:09:04 EDT 2014	Sample#2002560985436520546	f		20x, 63x	Annotator Gen1 MCFO	Aljoscha Nern
R11C05	attP2	hsPESTOPT_attP3_3stop1_X_0036	20140312_19_D5	Sat May 03 16:09:09 EDT 2014	Sample#2002561004151504994	f		20x, 63x	Annotator Gen1 MCFO	Aljoscha Nern
R11C05	attP2	hsPESTOPT_attP3_3stop1_X_0036	20140312_19_D6	Sat May 03 16:09:13 EDT 2014	Sample#2002561023206228066	f		20x, 63x	Annotator Gen1 MCFO	Aljoscha Nern
R11C05	attP2	hsPESTOPT_attP3_3stop1_X_0036	20140313_20_F1	Mon Apr 28 11:42:54 EDT 2014	Sample#2000682063694397538	f		20x, 63x	Annotator Gen1 MCFO	Aljoscha Nern
R11C05	attP2	hsPESTOPT_attP3_3stop1_X_0036	20140313_20_F3	Mon Apr 28 11:43:50 EDT 2014	Sample#2000682296901894242	f		20x, 63x	Annotator Gen1 MCFO	Aljoscha Nern
R11C05	attP2	hsPESTOPT_attP3_3stop1_X_0036	20140313_20_F4	Mon Apr 28 11:44:10 EDT 2014	Sample#2000682381106741346	f		20x, 63x	Annotator Gen1 MCFO	Aljoscha Nern
R11C05	attP2	hsPESTOPT_attP3_3stop1_X_0036	20140313_20_F6	Tue Apr 29 18:08:25 EDT 2014	Sample#2001141469221486690	f		20x	Annotator Gen1 MCFO	Aljoscha Nern
R11C05	attP2	hsPESTOPT_attP3_3stop1_X_0036	20140313_20_F7	Tue Apr 29 18:08:57 EDT 2014	Sample#2001141604357767266	f		20x, 63x	Annotator Gen1 MCFO	Aljoscha Nern
R11C05	attP2	hsPESTOPT_attP3_3stop1_X_0036	20140313_20_F8	Tue Apr 29 18:09:27 EDT 2014	Sample#2001141730195275874	f		20x, 63x	Annotator Gen1 MCFO	Aljoscha Nern
R11C05	attP2	hsPESTOPT_attP3_3stop1_X_0036	20140522_23_F1	Fri May 30 15:07:23 EDT 2014	Sample#2012329933220610146	f	30	20x	Annotator Gen1 MCFO	Aljoscha Nern
R11C05	attP2	hsPESTOPT_attP3_3stop1_X_0036	20140522_23_F2	Fri May 30 15:07:23 EDT 2014	Sample#2012329934260797538	f	30	20x	Annotator Gen1 MCFO	Aljoscha Nern
R11C05	attP2	hsPESTOPT_attP3_3stop1_X_0036	20140522_23_F3	Fri May 30 15:07:23 EDT 2014	Sample#2012329935481340002	f	30	20x	Annotator Gen1 MCFO	Aljoscha Nern
R11C05	attP2	hsPESTOPT_attP3_3stop1_X_0036	20140522_23_F4	Fri May 30 15:07:24 EDT 2014	Sample#2012329936508944482	f	30	20x	Annotator Gen1 MCFO	Aljoscha Nern
R11C05	attP2	hsPESTOPT_attP3_3stop1_X_0036	20140522_23_F5	Fri May 30 15:07:24 EDT 2014	Sample#2012329937523966050	f	30	20x	Annotator Gen1 MCFO	Aljoscha Nern
R11C05	attP2	hsPESTOPT_attP3_3stop1_X_0036	20140522_23_F6	Fri May 30 15:07:24 EDT 2014	Sample#2012329938547376226	f	30	20x	Annotator Gen1 MCFO	Aljoscha Nern
R11C05	attP2	hsPESTOPT_attP3_3stop1_X_0036	20140522_23_F7	Fri May 30 15:07:24 EDT 2014	Sample#2012329939608535138	f	30	20x	Annotator Gen1 MCFO	Aljoscha Nern
R11C05	attP2	hsPESTOPT_attP3_3stop1_X_0036	20140605_20_A1	Wed Jun 11 06:05:16 EDT 2014	Sample#2016542161180295266	f		20x	Annotator Gen1 MCFO	Aljoscha Nern
R11C05	attP2	hsPESTOPT_attP3_3stop1_X_0036	20140605_20_A2	Wed Jun 11 06:05:17 EDT 2014	Sample#2016542162560221282	f		20x	Annotator Gen1 MCFO	Aljoscha Nern
R11C05	attP2	hsPESTOPT_attP3_3stop1_X_0036	20140605_20_A3	Wed Jun 11 06:05:17 EDT 2014	Sample#2016542163717849186	f		20x	Annotator Gen1 MCFO	Aljoscha Nern
R11C05	attP2	hsPESTOPT_attP3_3stop1_X_0036	20140605_20_A4	Wed Jun 11 06:05:17 EDT 2014	Sample#2016542165085192290	f		20x	Annotator Gen1 MCFO	Aljoscha Nern
R11C05	attP2	hsPESTOPT_attP3_3stop1_X_0036	20140605_20_A5	Wed Jun 11 06:05:17 EDT 2014	Sample#2016542166280568930	f		20x	Annotator Gen1 MCFO	Aljoscha Nern
R11C05	attP2	hsPESTOPT_attP3_3stop1_X_0036	20140605_20_A6	Wed Jun 11 06:05:18 EDT 2014	Sample#2016542167463362658	f		20x	Annotator Gen1 MCFO	Aljoscha Nern
R11C05	attP2	hsPESTOPT_attP3_3stop1_X_0036	20140605_20_A7	Wed Jun 11 06:05:18 EDT 2014	Sample#2016542168767791202	f		20x	Annotator Gen1 MCFO	Aljoscha Nern
R11C05	attP2	hsPESTOPT_attP3_3stop1_X_0036	20140605_20_A8	Wed Jun 11 06:05:18 EDT 2014	Sample#2016542169946390626	f		20x	Annotator Gen1 MCFO	Aljoscha Nern
R11C05	attP2	57C10PEST_brp_SNAP_MCFO_X23_0099	20180828_62_G1	Thu Sep 13 18:55:11 EDT 2018	Sample#2580249046509682786	f		40x	Gen1 MCFO (40x)	NA
R11C05	attP2	57C10PEST_brp_SNAP_MCFO_X23_0099	20180828_62_G2	Thu Sep 13 18:55:11 EDT 2018	Sample#2580249046790701154	f		40x	Gen1 MCFO (40x)	NA
R11C05	attP2	57C10PEST_brp_SNAP_MCFO_X23_0099	20180828_62_G3	Thu Sep 13 18:55:11 EDT 2018	Sample#2580249047071719522	f		40x	Gen1 MCFO (40x)	NA
R11C05	attP2	57C10PEST_brp_SNAP_MCFO_X23_0099	20180828_62_G4	Thu Sep 13 18:55:11 EDT 2018	Sample#2580249047352737890	f		40x	Gen1 MCFO (40x)	NA
R11C05	attP2	57C10PEST_brp_SNAP_MCFO_X23_0099	20180828_62_G5	Thu Sep 13 18:55:11 EDT 2018	Sample#2580249047629561954	f		40x	Gen1 MCFO (40x)	NA
R11C05	attP2	57C10PEST_brp_SNAP_MCFO_X23_0099	20180828_62_G6	Thu Sep 13 18:55:11 EDT 2018	Sample#2580249047910580322	f		40x	Gen1 MCFO (40x)	NA
R11C05	attP2	57C10PEST_brp_SNAP_MCFO_X23_0099	20180828_62_H1	Thu Sep 13 18:55:11 EDT 2018	Sample#2580249048191598690	f		40x	Gen1 MCFO (40x)	NA
R11C07	attP2	57C10PEST_brp_SNAP_MCFO_X23_0099	20180828_62_I1	Thu Sep 13 18:55:11 EDT 2018	Sample#2580249048472617058	f		40x	Gen1 MCFO (40x)	NA
R11C07	attP2	57C10PEST_brp_SNAP_MCFO_X23_0099	20180828_62_I2	Thu Sep 13 18:55:11 EDT 2018	Sample#2580249048753635426	f		40x	Gen1 MCFO (40x)	NA
R11C07	attP2	57C10PEST_brp_SNAP_MCFO_X23_0099	20180828_62_I3	Thu Sep 13 18:55:11 EDT 2018	Sample#2580249049034653794	f		40x	Gen1 MCFO (40x)	NA
R11C07	attP2	57C10PEST_brp_SNAP_MCFO_X23_0099	20180828_62_I4	Thu Sep 13 18:55:12 EDT 2018	Sample#2580249049315672162	f		40x	Gen1 MCFO (40x)	NA
R11C07	attP2	57C10PEST_brp_SNAP_MCFO_X23_0099	20180828_62_I5	Thu Sep 13 18:55:12 EDT 2018	Sample#2580249049596690530	f		40x	Gen1 MCFO (40x)	NA
R11C07	attP2	57C10PEST_brp_SNAP_MCFO_X23_0099	20180828_62_I6	Thu Sep 13 18:55:12 EDT 2018	Sample#2580249049873514594	f		40x	Gen1 MCFO (40x)	NA
R11C10	attP2	57C10PEST_attp18_4stop1	20140508_32_C1	Sun Apr 24 16:35:00 EDT 2016	Sample#2264211549402955874	f		20x, 63x	Annotator Gen1 MCFO	Aljoscha Nern
R11C10	attP2	57C10PEST_attp18_4stop1	20140508_32_C2	Mon May 19 03:53:57 EDT 2014	Sample#2008174193920704610	f		20x	Annotator Gen1 MCFO	Aljoscha Nern
R11C10	attP2	57C10PEST_attp18_4stop1	20140508_32_C3	Mon May 19 03:53:58 EDT 2014	Sample#2008174195426459746	f		20x	Annotator Gen1 MCFO	Aljoscha Nern
R11C10	attP2	57C10PEST_attp18_4stop1	20140508_32_C4	Mon May 19 03:53:58 EDT 2014	Sample#2008174196596670562	f		20x	Annotator Gen1 MCFO	Aljoscha Nern
R11C10	attP2	57C10PEST_attp18_4stop1	20140508_32_C5	Mon May 19 03:53:58 EDT 2014	Sample#2008174198022733922	f		20x	Annotator Gen1 MCFO	Aljoscha Nern
R11C10	attP2	57C10PEST_attp18_4stop1	20140508_32_C6	Mon May 19 03:53:59 EDT 2014	Sample#2008174199134224482	f		20x	Annotator Gen1 MCFO	Aljoscha Nern
R11C10	attP2	57C10PEST_attp18_4stop1	20140508_32_C7	Mon May 19 03:53:59 EDT 2014	Sample#2008174200283463778	f		20x	Annotator Gen1 MCFO	Aljoscha Nern
R11C10	attP2	57C10PEST_attp18_4stop1	20140508_32_C8	Mon May 19 03:53:59 EDT 2014	Sample#2008174201348816994	f		20x	Annotator Gen1 MCFO	Aljoscha Nern
R11C10	attP2	57C10PEST_brp_SNAP_MCFO_X23_0099	20181121_62_B1	Thu Dec 20 12:07:31 EST 2018	Sample#2615675566610710626	f		40x	Gen1 MCFO (40x)	NA
R11C10	attP2	57C10PEST_brp_SNAP_MCFO_X23_0099	20181121_62_B2	Thu Dec 20 12:07:32 EST 2018	Sample#2615675567197913186	f		40x	Gen1 MCFO (40x)	NA
R11C10	attP2	57C10PEST_brp_SNAP_MCFO_X23_0099	20181121_62_B3	Thu Dec 20 12:07:32 EST 2018	Sample#2615675567827058786	f		40x	Gen1 MCFO (40x)	NA
R11C10	attP2	57C10PEST_brp_SNAP_MCFO_X23_0099	20181121_62_B4	Thu Dec 20 12:07:32 EST 2018	Sample#2615675568384901218	f		40x	Gen1 MCFO (40x)	NA
R11C10	attP2	57C10PEST_brp_SNAP_MCFO_X23_0099	20181121_62_B5	Thu Dec 20 12:07:32 EST 2018	Sample#2615675568938549346	f		40x	Gen1 MCFO (40x)	NA
R11C10	attP2	57C10PEST_brp_SNAP_MCFO_X23_0099	20181121_62_B6	Thu Dec 20 12:07:37 EST 2018	Sample#2615675588660166754	f		40x	Gen1 MCFO (40x)	NA
R11C10	attP2	pBPhsFlp2_PEST_brp_SNAP_MCFO_0128	20191025_63_E1	Tue Nov 05 12:44:02 EST 2019	Sample#2731648873125642338	m	40	40x	Gen1 MCFO (40x)	NA
R11C10	attP2	pBPhsFlp2_PEST_brp_SNAP_MCFO_0128	20191025_63_E2	Tue Nov 05 12:44:17 EST 2019	Sample#2731648934190514274	m	40	40x	Gen1 MCFO (40x)	NA
R11C10	attP2	pBPhsFlp2_PEST_brp_SNAP_MCFO_0128	20191025_63_E3	Tue Nov 05 12:44:17 EST 2019	Sample#2731648935276839010	m	40	40x	Gen1 MCFO (40x)	NA
R11C10	attP2	pBPhsFlp2_PEST_brp_SNAP_MCFO_0128	20191025_63_E4	Tue Nov 05 12:44:17 EST 2019	Sample#2731648936161837154	m	40	40x	Gen1 MCFO (40x)	NA
R11C10	attP2	pBPhsFlp2_PEST_brp_SNAP_MCFO_0128	20191025_63_E5	Tue Nov 05 12:44:18 EST 2019	Sample#2731648937038446690	m	40	40x	Gen1 MCFO (40x)	NA
R11C10	attP2	pBPhsFlp2_PEST_brp_SNAP_MCFO_0128	20191025_63_E6	Tue Nov 05 12:44:18 EST 2019	Sample#2731648937915056226	m	40	40x	Gen1 MCFO (40x)	NA
R11C10	attP2	pBPhsFlp2_PEST_brp_SNAP_MCFO_0128	20191025_63_E7	Tue Nov 05 12:44:18 EST 2019	Sample#2731648938779082850	m	40	40x	Gen1 MCFO (40x)	NA
R11C10	attP2	pBPhsFlp2_PEST_brp_SNAP_MCFO_0128	20191025_63_E8	Tue Nov 05 12:44:18 EST 2019	Sample#2731648939630526562	m	40	40x	Gen1 MCFO (40x)	NA
R11D01	attP2	57C10PEST_brp_SNAP_MCFO_X23_0099	20181109_62_F1	Tue Nov 27 16:55:03 EST 2018	Sample#2607413002361634914	f		40x	Gen1 MCFO (40x)	NA
R11D01	attP2	57C10PEST_brp_SNAP_MCFO_X23_0099	20181109_62_F2	Tue Nov 27 16:55:08 EST 2018	Sample#2607413025644216418	f		40x	Gen1 MCFO (40x)	NA
R11D01	attP2	57C10PEST_brp_SNAP_MCFO_X23_0099	20181109_62_F3	Tue Nov 27 16:55:08 EST 2018	Sample#2607413026202058850	f		40x	Gen1 MCFO (40x)	NA
R11D01	attP2	57C10PEST_brp_SNAP_MCFO_X23_0099	20181109_62_F4	Tue Nov 27 16:55:08 EST 2018	Sample#2607413026827010146	f		40x	Gen1 MCFO (40x)	NA
R11D01	attP2	57C10PEST_brp_SNAP_MCFO_X23_0099	20181109_62_F5	Tue Nov 27 16:55:09 EST 2018	Sample#2607413027368075362	f		40x	Gen1 MCFO (40x)	NA
R11D01	attP2	57C10PEST_brp_SNAP_MCFO_X23_0099	20181109_62_F6	Tue Nov 27 16:55:09 EST 2018	Sample#2607413027904946274	f		40x	Gen1 MCFO (40x)	NA
R11D02	attP2	57C10PEST_attp18_4stop1	20140701_19_H1	Thu Feb 12 20:29:48 EST 2015	Sample#2105922241031045218	f	15	20x, 63x	Annotator Gen1 MCFO	Aljoscha Nern
R11D02	attP2	57C10PEST_attp18_4stop1	20140701_19_H2	Thu Feb 12 20:32:13 EST 2015	Sample#2105922850505359458	f	15	20x, 63x	Annotator Gen1 MCFO	Aljoscha Nern
R11D02	attP2	57C10PEST_attp18_4stop1	20140701_19_H3	Thu Feb 12 20:33:52 EST 2015	Sample#2105923266559344738	f	15	20x, 63x	Annotator Gen1 MCFO	Aljoscha Nern
R11D02	attP2	57C10PEST_attp18_4stop1	20140701_19_H5	Thu Feb 12 20:41:52 EST 2015	Sample#2105925278902517858	f	15	20x, 63x	Annotator Gen1 MCFO	Aljoscha Nern
R11D02	attP2	57C10PEST_attp18_4stop1	20140701_19_H6	Thu Feb 12 20:44:15 EST 2015	Sample#2105925875856834658	f	15	20x, 63x	Annotator Gen1 MCFO	Aljoscha Nern
R11D02	attP2	57C10PEST_attp18_4stop1	20140701_19_H7	Mon Jul 07 22:25:10 EDT 2014	Sample#2026210845322641506	f		20x	Annotator Gen1 MCFO	Aljoscha Nern
R11D02	attP2	57C10PEST_attp18_4stop1	20140701_19_H8	Thu Feb 12 20:46:25 EST 2015	Sample#2105926423813292130	f	15	20x	Annotator Gen1 MCFO	Aljoscha Nern
R11D02	attP2	57C10PEST_attp18_4stop1	20160708_24_A1	Mon Aug 22 18:47:07 EDT 2016	Sample#2307731340889424017	f		20x, 63x	Annotator Gen1 MCFO	Aljoscha Nern
R11D02	attP2	57C10PEST_attp18_4stop1	20160708_24_A2	Thu Nov 03 17:10:47 EDT 2016	Sample#2334161412701552714	f		20x	Annotator Gen1 MCFO	Aljoscha Nern
R11D02	attP2	57C10PEST_attp18_4stop1	20160708_24_A3	Thu Nov 03 17:10:47 EDT 2016	Sample#2334161413452333130	f		20x	Annotator Gen1 MCFO	Aljoscha Nern
R11D02	attP2	57C10PEST_attp18_4stop1	20160708_24_A4	Thu Nov 03 17:10:47 EDT 2016	Sample#2334161414320554058	f		20x	Annotator Gen1 MCFO	Aljoscha Nern
R11D02	attP2	57C10PEST_attp18_4stop1	20160708_24_A5	Mon Aug 22 18:47:07 EDT 2016	Sample#2307731341036224657	f		20x, 63x	Annotator Gen1 MCFO	Aljoscha Nern
R11D02	attP2	57C10PEST_attp18_4stop1	20160708_24_A6	Mon Aug 22 18:47:07 EDT 2016	Sample#2307731341183025297	f		20x, 63x	Annotator Gen1 MCFO	Aljoscha Nern
R11D02	attP2	57C10PEST_attp18_4stop1	20160708_24_A7	Tue Aug 23 15:07:21 EDT 2016	Sample#2308038421873950865	f		20x, 63x	Annotator Gen1 MCFO	Aljoscha Nern
R11D02	attP2	57C10PEST_attp18_4stop1	20160708_24_A8	Mon Aug 22 18:47:07 EDT 2016	Sample#2307731341325631633	f		20x, 63x	Annotator Gen1 MCFO	Aljoscha Nern
R11D02	attP2	57C10PEST_attp18_4stop1	20160708_24_B1	Thu Nov 03 17:10:48 EDT 2016	Sample#2334161418686824522	f		20x	Annotator Gen1 MCFO	Aljoscha Nern
R11D02	attP2	57C10PEST_attp8_3stop1	20130520_2_A1	Sat Feb 22 05:55:10 EST 2014	Sample#1977054439642497031	f		20x	Annotator Gen1 MCFO	Tanya Wolff
R11D02	attP2	57C10PEST_attp8_3stop1	20130520_2_A2	Sat Feb 22 05:55:10 EST 2014	Sample#1977054440372305927	f		20x	Annotator Gen1 MCFO	Tanya Wolff
R11D02	attP2	57C10PEST_attp8_3stop1	20130520_2_A3	Sat Feb 22 05:55:10 EST 2014	Sample#1977054441123086343	f		20x	Annotator Gen1 MCFO	Tanya Wolff
R11D02	attP2	57C10PEST_attp8_3stop1	20130520_2_A4	Sat Feb 22 05:55:10 EST 2014	Sample#1977054441882255367	f		20x	Annotator Gen1 MCFO	Tanya Wolff
R11D02	attP2	57C10PEST_attp8_3stop1	20130520_2_A5	Sat Feb 22 05:55:11 EST 2014	Sample#1977054442595287047	f		20x	Annotator Gen1 MCFO	Tanya Wolff
R11D02	attP2	57C10PEST_attp8_3stop1	20130520_2_A6	Sat Feb 22 05:55:11 EST 2014	Sample#1977054443220238343	f		20x	Annotator Gen1 MCFO	Tanya Wolff
R11D02	attP2	57C10PEST_attp8_3stop1	20130610_3_F2	Thu Mar 13 18:06:12 EDT 2014	Sample#1984108681960095842	f		20x	Annotator Gen1 MCFO	Tanya Wolff
R11D02	attP2	57C10PEST_attp8_3stop1	20130610_3_F3	Thu Mar 13 18:06:12 EDT 2014	Sample#1984108682434052194	f		20x	Annotator Gen1 MCFO	Tanya Wolff
R11D02	attP2	57C10PEST_attp8_3stop1	20130610_3_F4	Thu Mar 13 18:06:12 EDT 2014	Sample#1984108682798956642	f		20x	Annotator Gen1 MCFO	Tanya Wolff
R11D02	attP2	57C10PEST_attp8_3stop1	20130610_3_F5	Thu Mar 13 18:06:13 EDT 2014	Sample#1984108683574902882	f		20x	Annotator Gen1 MCFO	Tanya Wolff
R11D02	attP2	57C10PEST_attp8_3stop1	20130610_3_F6	Thu Mar 13 18:06:13 EDT 2014	Sample#1984108684476678242	f		20x	Annotator Gen1 MCFO	Tanya Wolff
R11D02	attP2	57C10PEST_attp8_3stop1	20130610_3_G1	Thu Mar 13 18:06:13 EDT 2014	Sample#1984108684891914338	f		20x	Annotator Gen1 MCFO	Tanya Wolff
R11D02	attP2	57C10PEST_attp8_3stop1	20130610_3_G2	Thu Mar 13 18:06:13 EDT 2014	Sample#1984108685948878946	f		20x	Annotator Gen1 MCFO	Tanya Wolff
R11D02	attP2	57C10PEST_attp8_3stop1	20130610_3_G3	Thu Mar 13 18:06:13 EDT 2014	Sample#1984108686359920738	f		20x	Annotator Gen1 MCFO	Tanya Wolff
R11D02	attP2	57C10PEST_attp8_3stop1	20130725_1_A1	Tue May 13 14:09:14 EDT 2014	Sample#2006154708221165666	f		20x	Annotator Gen1 MCFO	Tanya Wolff
R11D02	attP2	57C10PEST_attp8_3stop1	20130725_1_A2	Tue May 13 14:09:15 EDT 2014	Sample#2006154709240385634	f		20x	Annotator Gen1 MCFO	Tanya Wolff
R11D02	attP2	57C10PEST_attp8_3stop1	20130725_1_A3	Tue May 13 14:09:15 EDT 2014	Sample#2006154710192488546	f		20x	Annotator Gen1 MCFO	Tanya Wolff
R11D02	attP2	57C10PEST_attp8_3stop1	20130725_1_A5	Tue May 13 14:09:16 EDT 2014	Sample#2006154713099141218	f		20x	Annotator Gen1 MCFO	Tanya Wolff
R11D02	attP2	57C10PEST_attp8_3stop1	20130725_1_B4	Tue May 13 14:09:19 EDT 2014	Sample#2006154728060223586	f		20x	Annotator Gen1 MCFO	Tanya Wolff
R11D02	attP2	57C10wt_attp8_3stop1	20130606_2_B1	Thu Jan 22 11:45:02 EST 2015	Sample#2098180032563249159	f	15	20x	Annotator Gen1 MCFO	Tanya Wolff
R11D02	attP2	57C10wt_attp8_3stop1	20130606_2_B5	Thu Jan 22 11:45:04 EST 2015	Sample#2098180041094463495	f	15	20x	Annotator Gen1 MCFO	Tanya Wolff
R11D02	attP2	57C10wt_attp8_3stop1	20130606_2_B6	Thu Jan 22 11:45:04 EST 2015	Sample#2098180042814128135	f	15	20x	Annotator Gen1 MCFO	Tanya Wolff
R11D02	attP2	57C10wt_attp8_3stop1	20130606_2_C2	Thu Jan 22 11:45:04 EST 2015	Sample#2098180044537987079	f	15	20x	Annotator Gen1 MCFO	Tanya Wolff
R11D02	attP2	57C10PEST_brp_SNAP_MCFO_X23_0099	20180828_62_J1	Thu Sep 13 18:55:12 EDT 2018	Sample#2580249050154532962	f		40x	Gen1 MCFO (40x)	NA
R11D02	attP2	57C10PEST_brp_SNAP_MCFO_X23_0099	20180828_62_J2	Thu Sep 13 18:55:12 EDT 2018	Sample#2580249050435551330	f		40x	Gen1 MCFO (40x)	NA
R11D02	attP2	57C10PEST_brp_SNAP_MCFO_X23_0099	20180828_62_J3	Thu Sep 13 18:55:12 EDT 2018	Sample#2580249050716569698	f		40x	Gen1 MCFO (40x)	NA
R11D02	attP2	57C10PEST_brp_SNAP_MCFO_X23_0099	20180828_62_J4	Thu Sep 13 18:55:12 EDT 2018	Sample#2580249050997588066	f		40x	Gen1 MCFO (40x)	NA
R11D02	attP2	57C10PEST_brp_SNAP_MCFO_X23_0099	20180828_62_J5	Thu Sep 13 18:55:12 EDT 2018	Sample#2580249051278606434	f		40x	Gen1 MCFO (40x)	NA
R11D02	attP2	57C10PEST_brp_SNAP_MCFO_X23_0099	20180828_62_J6	Thu Sep 13 18:55:12 EDT 2018	Sample#2580249051559624802	f		40x	Gen1 MCFO (40x)	NA
R11D03	attP2	57C10PEST_brp_SNAP_MCFO_X23_0099	20181121_62_C1	Thu Dec 20 12:29:56 EST 2018	Sample#2615681206657744994	f		40x	Gen1 MCFO (40x)	NA
R11D03	attP2	57C10PEST_brp_SNAP_MCFO_X23_0099	20181121_62_C2	Thu Dec 20 12:29:56 EST 2018	Sample#2615681207219781730	f		40x	Gen1 MCFO (40x)	NA
R11D03	attP2	57C10PEST_brp_SNAP_MCFO_X23_0099	20181121_62_C3	Thu Dec 20 12:29:56 EST 2018	Sample#2615681207718903906	f		40x	Gen1 MCFO (40x)	NA
R11D03	attP2	57C10PEST_brp_SNAP_MCFO_X23_0099	20181121_62_C4	Thu Dec 20 12:29:57 EST 2018	Sample#2615681208247386210	f		40x	Gen1 MCFO (40x)	NA
R11D03	attP2	57C10PEST_brp_SNAP_MCFO_X23_0099	20181121_62_C5	Thu Dec 20 12:29:57 EST 2018	Sample#2615681208771674210	f		40x	Gen1 MCFO (40x)	NA
R11D03	attP2	57C10PEST_brp_SNAP_MCFO_X23_0099	20181121_62_C6	Thu Dec 20 12:29:57 EST 2018	Sample#2615681209333710946	f		40x	Gen1 MCFO (40x)	NA
R11D03	attP2	pBPhsFlp2_PEST_brp_SNAP_MCFO_0128	20191022_63_A1	Mon Nov 04 18:57:29 EST 2019	Sample#2731380464647405666	m	40	40x	Gen1 MCFO (40x)	NA
R11D03	attP2	pBPhsFlp2_PEST_brp_SNAP_MCFO_0128	20191022_63_A6	Mon Nov 04 18:57:29 EST 2019	Sample#2731380465528209506	m	40	40x	Gen1 MCFO (40x)	NA
R11D06	attP2	57C10PEST_brp_SNAP_MCFO_X23_0099	20181109_61_G1	Thu Nov 29 17:44:02 EST 2018	Sample#2608150107027144802	f		40x	Gen1 MCFO (40x)	NA
R11D06	attP2	57C10PEST_brp_SNAP_MCFO_X23_0099	20181109_61_G2	Thu Nov 29 17:44:02 EST 2018	Sample#2608150107576598626	f		40x	Gen1 MCFO (40x)	NA
R11D06	attP2	57C10PEST_brp_SNAP_MCFO_X23_0099	20181109_61_G3	Thu Nov 29 17:44:02 EST 2018	Sample#2608150108134441058	f		40x	Gen1 MCFO (40x)	NA
R11D06	attP2	57C10PEST_brp_SNAP_MCFO_X23_0099	20181109_61_G4	Thu Nov 29 17:44:02 EST 2018	Sample#2608150108696477794	f		40x	Gen1 MCFO (40x)	NA
R11D06	attP2	pBPhsFlp2_PEST_brp_SNAP_MCFO_0128	20191022_61_C1	Mon Nov 04 18:08:44 EST 2019	Sample#2731368198082396258	m	40	40x	Gen1 MCFO (40x)	NA
R11D06	attP2	pBPhsFlp2_PEST_brp_SNAP_MCFO_0128	20191022_61_C2	Mon Nov 04 18:08:45 EST 2019	Sample#2731368198988365922	m	40	40x	Gen1 MCFO (40x)	NA
R11D06	attP2	pBPhsFlp2_PEST_brp_SNAP_MCFO_0128	20191022_61_C3	Mon Nov 04 18:08:45 EST 2019	Sample#2731368199885946978	m	40	40x	Gen1 MCFO (40x)	NA
R11D06	attP2	pBPhsFlp2_PEST_brp_SNAP_MCFO_0128	20191022_61_C4	Mon Nov 04 18:08:45 EST 2019	Sample#2731368200729002082	m	40	40x	Gen1 MCFO (40x)	NA
R11D06	attP2	pBPhsFlp2_PEST_brp_SNAP_MCFO_0128	20191022_61_C5	Mon Nov 04 18:08:45 EST 2019	Sample#2731368201567862882	m	40	40x	Gen1 MCFO (40x)	NA
R11D06	attP2	pBPhsFlp2_PEST_brp_SNAP_MCFO_0128	20191022_61_C6	Mon Nov 04 18:08:45 EST 2019	Sample#2731368202410917986	m	40	40x	Gen1 MCFO (40x)	NA
R11D06	attP2	pBPhsFlp2_PEST_brp_SNAP_MCFO_0128	20191022_61_C7	Mon Nov 04 18:08:46 EST 2019	Sample#2731368203245584482	m	40	40x	Gen1 MCFO (40x)	NA
R11D08	attP2	57C10PEST_brp_SNAP_MCFO_X23_0099	20181109_62_G1	Tue Nov 27 16:55:09 EST 2018	Sample#2607413028387291234	f		40x	Gen1 MCFO (40x)	NA
R11D08	attP2	57C10PEST_brp_SNAP_MCFO_X23_0099	20181109_62_G2	Tue Nov 27 16:55:09 EST 2018	Sample#2607413028919967842	f		40x	Gen1 MCFO (40x)	NA
R11D08	attP2	57C10PEST_brp_SNAP_MCFO_X23_0099	20181109_62_G4	Tue Nov 27 16:55:09 EST 2018	Sample#2607413029456838754	f		40x	Gen1 MCFO (40x)	NA
R11D08	attP2	57C10PEST_brp_SNAP_MCFO_X23_0099	20181109_62_G5	Tue Nov 27 16:55:09 EST 2018	Sample#2607413030006292578	f		40x	Gen1 MCFO (40x)	NA
R11D08	attP2	57C10PEST_brp_SNAP_MCFO_X23_0099	20181109_62_G6	Tue Nov 27 16:55:09 EST 2018	Sample#2607413030555746402	f		40x	Gen1 MCFO (40x)	NA
R11D08	attP2	57C10PEST_brp_SNAP_MCFO_X23_0099	20181109_62_H1	Tue Nov 27 16:55:10 EST 2018	Sample#2607413031172309090	f		40x	Gen1 MCFO (40x)	NA
R11D09	attP2	57C10PEST_brp_SNAP_MCFO_X23_0099	20181121_62_D1	Thu Dec 20 12:29:57 EST 2018	Sample#2615681209862193250	f		40x	Gen1 MCFO (40x)	NA
R11D09	attP2	57C10PEST_brp_SNAP_MCFO_X23_0099	20181121_62_D2	Thu Dec 20 12:29:57 EST 2018	Sample#2615681210415841378	f		40x	Gen1 MCFO (40x)	NA
R11D09	attP2	57C10PEST_brp_SNAP_MCFO_X23_0099	20181121_62_D3	Thu Dec 20 12:29:57 EST 2018	Sample#2615681210969489506	f		40x	Gen1 MCFO (40x)	NA
R11D09	attP2	57C10PEST_brp_SNAP_MCFO_X23_0099	20181121_62_D4	Thu Dec 20 12:29:57 EST 2018	Sample#2615681211464417378	f		40x	Gen1 MCFO (40x)	NA
R11D09	attP2	57C10PEST_brp_SNAP_MCFO_X23_0099	20181121_62_D5	Thu Dec 20 12:29:57 EST 2018	Sample#2615681212026454114	f		40x	Gen1 MCFO (40x)	NA
R11D09	attP2	57C10PEST_brp_SNAP_MCFO_X23_0099	20181121_62_D6	Thu Dec 20 12:29:58 EST 2018	Sample#2615681212580102242	f		40x	Gen1 MCFO (40x)	NA
R11D09	attP2	pBPhsFlp2_PEST_brp_SNAP_MCFO_0128	20191011_63_F1	Tue Oct 29 18:29:56 EDT 2019	Sample#2729184107090149474	m	13	40x	Gen1 MCFO (40x)	NA
R11D09	attP2	pBPhsFlp2_PEST_brp_SNAP_MCFO_0128	20191011_63_F2	Tue Oct 29 18:29:57 EDT 2019	Sample#2729184107983536226	m	13	40x	Gen1 MCFO (40x)	NA
R11D09	attP2	pBPhsFlp2_PEST_brp_SNAP_MCFO_0128	20191011_63_F3	Tue Oct 29 18:29:57 EDT 2019	Sample#2729184108872728674	m	13	40x	Gen1 MCFO (40x)	NA
R11D09	attP2	pBPhsFlp2_PEST_brp_SNAP_MCFO_0128	20191011_63_F4	Tue Oct 29 18:29:57 EDT 2019	Sample#2729184109757726818	m	13	40x	Gen1 MCFO (40x)	NA
R11E07	attP2	57C10PEST_brp_SNAP_MCFO_X23_0099	20181121_62_E1	Thu Dec 20 12:29:58 EST 2018	Sample#2615681213142138978	f		40x	Gen1 MCFO (40x)	NA
R11E07	attP2	57C10PEST_brp_SNAP_MCFO_X23_0099	20181121_62_E2	Thu Dec 20 12:29:58 EST 2018	Sample#2615681213699981410	f		40x	Gen1 MCFO (40x)	NA
R11E07	attP2	57C10PEST_brp_SNAP_MCFO_X23_0099	20181121_62_E3	Thu Dec 20 12:29:58 EST 2018	Sample#2615681214257823842	f		40x	Gen1 MCFO (40x)	NA
R11E07	attP2	57C10PEST_brp_SNAP_MCFO_X23_0099	20181121_62_E4	Thu Dec 20 12:29:58 EST 2018	Sample#2615681214819860578	f		40x	Gen1 MCFO (40x)	NA
R11E07	attP2	57C10PEST_brp_SNAP_MCFO_X23_0099	20181121_62_E5	Thu Dec 20 12:29:58 EST 2018	Sample#2615681215377703010	f		40x	Gen1 MCFO (40x)	NA
R11E07	attP2	57C10PEST_brp_SNAP_MCFO_X23_0099	20181121_62_E6	Thu Dec 20 12:29:58 EST 2018	Sample#2615681215935545442	f		40x	Gen1 MCFO (40x)	NA
R11E07	attP2	pBPhsFlp2_PEST_brp_SNAP_MCFO_0128	20191011_63_G1	Tue Oct 29 18:29:57 EDT 2019	Sample#2729184110584004706	m	13	40x	Gen1 MCFO (40x)	NA
R11E07	attP2	pBPhsFlp2_PEST_brp_SNAP_MCFO_0128	20191011_63_G10	Tue Oct 29 18:29:59 EDT 2019	Sample#2729184118284746850	m	13	40x	Gen1 MCFO (40x)	NA
R11E07	attP2	pBPhsFlp2_PEST_brp_SNAP_MCFO_0128	20191011_63_G2	Tue Oct 29 18:29:57 EDT 2019	Sample#2729184111531917410	m	13	40x	Gen1 MCFO (40x)	NA
R11E07	attP2	pBPhsFlp2_PEST_brp_SNAP_MCFO_0128	20191011_63_G3	Tue Oct 29 18:29:58 EDT 2019	Sample#2729184112425304162	m	13	40x	Gen1 MCFO (40x)	NA
R11E07	attP2	pBPhsFlp2_PEST_brp_SNAP_MCFO_0128	20191011_63_G4	Tue Oct 29 18:29:58 EDT 2019	Sample#2729184113360633954	m	13	40x	Gen1 MCFO (40x)	NA
R11E07	attP2	pBPhsFlp2_PEST_brp_SNAP_MCFO_0128	20191011_63_G5	Tue Oct 29 18:29:58 EDT 2019	Sample#2729184114178523234	m	13	40x	Gen1 MCFO (40x)	NA
R11E07	attP2	pBPhsFlp2_PEST_brp_SNAP_MCFO_0128	20191011_63_G6	Tue Oct 29 18:29:58 EDT 2019	Sample#2729184115000606818	m	13	40x	Gen1 MCFO (40x)	NA
R11E07	attP2	pBPhsFlp2_PEST_brp_SNAP_MCFO_0128	20191011_63_G7	Tue Oct 29 18:29:58 EDT 2019	Sample#2729184115810107490	m	13	40x	Gen1 MCFO (40x)	NA
R11E07	attP2	pBPhsFlp2_PEST_brp_SNAP_MCFO_0128	20191011_63_G8	Tue Oct 29 18:29:59 EDT 2019	Sample#2729184116644773986	m	13	40x	Gen1 MCFO (40x)	NA
R11E07	attP2	pBPhsFlp2_PEST_brp_SNAP_MCFO_0128	20191011_63_G9	Tue Oct 29 18:29:59 EDT 2019	Sample#2729184117462663266	m	13	40x	Gen1 MCFO (40x)	NA
R11E08	attP2	57C10PEST_brp_SNAP_MCFO_X23_0099	20181121_62_F1	Thu Dec 20 12:29:59 EST 2018	Sample#2615681216497582178	f		40x	Gen1 MCFO (40x)	NA
R11E08	attP2	57C10PEST_brp_SNAP_MCFO_X23_0099	20181121_62_F2	Thu Dec 20 12:29:59 EST 2018	Sample#2615681217055424610	f		40x	Gen1 MCFO (40x)	NA
R11E08	attP2	57C10PEST_brp_SNAP_MCFO_X23_0099	20181121_62_F3	Thu Dec 20 12:29:59 EST 2018	Sample#2615681217613267042	f		40x	Gen1 MCFO (40x)	NA
R11E08	attP2	57C10PEST_brp_SNAP_MCFO_X23_0099	20181121_62_F4	Thu Dec 20 12:29:59 EST 2018	Sample#2615681218175303778	f		40x	Gen1 MCFO (40x)	NA
R11E08	attP2	57C10PEST_brp_SNAP_MCFO_X23_0099	20181121_62_F5	Thu Dec 20 12:29:59 EST 2018	Sample#2615681218737340514	f		40x	Gen1 MCFO (40x)	NA
R11E08	attP2	57C10PEST_brp_SNAP_MCFO_X23_0099	20181121_62_F6	Thu Dec 20 12:29:59 EST 2018	Sample#2615681219299377250	f		40x	Gen1 MCFO (40x)	NA
R11E08	attP2	pBPhsFlp2_PEST_brp_SNAP_MCFO_0128	20191022_63_B1	Mon Nov 04 18:57:29 EST 2019	Sample#2731380466375458914	m	40	40x	Gen1 MCFO (40x)	NA
R11E08	attP2	pBPhsFlp2_PEST_brp_SNAP_MCFO_0128	20191022_63_B2	Mon Nov 04 18:57:29 EST 2019	Sample#2731380467285622882	m	40	40x	Gen1 MCFO (40x)	NA
R11E08	attP2	pBPhsFlp2_PEST_brp_SNAP_MCFO_0128	20191022_63_B3	Mon Nov 04 18:57:30 EST 2019	Sample#2731380468195786850	m	40	40x	Gen1 MCFO (40x)	NA
R11E08	attP2	pBPhsFlp2_PEST_brp_SNAP_MCFO_0128	20191022_63_B4	Mon Nov 04 18:57:30 EST 2019	Sample#2731380469055619170	m	40	40x	Gen1 MCFO (40x)	NA
R11E08	attP2	pBPhsFlp2_PEST_brp_SNAP_MCFO_0128	20191022_63_B5	Mon Nov 04 18:57:30 EST 2019	Sample#2731380469915451490	m	40	40x	Gen1 MCFO (40x)	NA
R11E08	attP2	pBPhsFlp2_PEST_brp_SNAP_MCFO_0128	20191022_63_B6	Mon Nov 04 18:57:30 EST 2019	Sample#2731380470779478114	m	40	40x	Gen1 MCFO (40x)	NA
R11E08	attP2	pBPhsFlp2_PEST_brp_SNAP_MCFO_0128	20191022_63_B7	Mon Nov 04 18:57:31 EST 2019	Sample#2731380471635116130	m	40	40x	Gen1 MCFO (40x)	NA
R11E10	attP2	57C10PEST_attp8_3stop1	20161222_27_C1	Thu Jan 05 13:03:22 EST 2017	Sample#2356944685303332962	f		20x, 63x	Annotator Gen1 MCFO	Gabriella Sterne
R11E10	attP2	57C10PEST_attp8_3stop1	20161222_27_C2	Thu Jan 05 13:03:22 EST 2017	Sample#2356944685437550690	f		20x	Annotator Gen1 MCFO	Gabriella Sterne
R11E10	attP2	57C10PEST_attp8_3stop1	20161222_27_C3	Thu Jan 05 13:03:22 EST 2017	Sample#2356944685567574114	f		20x	Annotator Gen1 MCFO	Gabriella Sterne
R11E10	attP2	57C10PEST_attp8_3stop1	20161222_27_C4	Thu Jan 05 13:03:22 EST 2017	Sample#2356944685701791842	f		20x	Annotator Gen1 MCFO	Gabriella Sterne
R11E10	attP2	57C10PEST_attp8_3stop1	20161222_27_C5	Thu Jan 05 13:03:23 EST 2017	Sample#2356944685831815266	f		20x, 63x	Annotator Gen1 MCFO	Gabriella Sterne
R11E10	attP2	57C10PEST_attp8_3stop1	20161222_27_C6	Thu Jan 05 13:03:23 EST 2017	Sample#2356944685961838690	f		20x	Annotator Gen1 MCFO	Gabriella Sterne
R11E10	attP2	57C10PEST_attp8_3stop1	20161222_27_C7	Thu Jan 05 13:03:23 EST 2017	Sample#2356944686083473506	f		20x, 63x	Annotator Gen1 MCFO	Gabriella Sterne
R11E10	attP2	57C10PEST_brp_SNAP_MCFO_X23_0099	20180828_63_A1	Wed Sep 05 17:25:04 EDT 2018	Sample#2577327265280950370	f		40x	Gen1 MCFO (40x)	NA
R11E10	attP2	57C10PEST_brp_SNAP_MCFO_X23_0099	20180828_63_A2	Wed Sep 05 17:25:04 EDT 2018	Sample#2577327265557774434	f		40x	Gen1 MCFO (40x)	NA
R11E10	attP2	57C10PEST_brp_SNAP_MCFO_X23_0099	20180828_63_A4	Wed Sep 05 17:25:04 EDT 2018	Sample#2577327265826209890	f		40x	Gen1 MCFO (40x)	NA
R11E10	attP2	57C10PEST_brp_SNAP_MCFO_X23_0099	20180828_63_A6	Wed Sep 05 17:25:04 EDT 2018	Sample#2577327266098839650	f		40x	Gen1 MCFO (40x)	NA
R11E10	attP2	57C10PEST_brp_SNAP_MCFO_X23_0099	20180828_63_B1	Wed Sep 05 17:25:04 EDT 2018	Sample#2577327266367275106	f		40x	Gen1 MCFO (40x)	NA
R11F02	attP2	57C10PEST_brp_SNAP_MCFO_X23_0099	20180828_63_C1	Wed Sep 05 17:25:04 EDT 2018	Sample#2577327266639904866	f		40x	Gen1 MCFO (40x)	NA
R11F02	attP2	57C10PEST_brp_SNAP_MCFO_X23_0099	20180828_63_C3	Wed Sep 05 17:25:04 EDT 2018	Sample#2577327266904146018	f		40x	Gen1 MCFO (40x)	NA
R11F02	attP2	57C10PEST_brp_SNAP_MCFO_X23_0099	20180828_63_C4	Wed Sep 05 17:25:04 EDT 2018	Sample#2577327267172581474	f		40x	Gen1 MCFO (40x)	NA
R11F02	attP2	57C10PEST_brp_SNAP_MCFO_X23_0099	20180828_63_C5	Wed Sep 05 17:25:04 EDT 2018	Sample#2577327267436822626	f		40x	Gen1 MCFO (40x)	NA
R11F02	attP2	57C10PEST_brp_SNAP_MCFO_X23_0099	20180828_63_C6	Wed Sep 05 17:25:05 EDT 2018	Sample#2577327267659120738	f		40x	Gen1 MCFO (40x)	NA
R11F02	attP2	57C10PEST_brp_SNAP_MCFO_X23_0099	20180828_63_D1	Wed Sep 05 17:25:05 EDT 2018	Sample#2577327267927556194	f		40x	Gen1 MCFO (40x)	NA
R11F02	attP2	pBPhsFlp2_PEST_brp_SNAP_MCFO_0128	20190423_64_C1	Tue Apr 30 13:13:10 EDT 2019	Sample#2663149798101614690	m	40	40x	Gen1 MCFO (40x)	NA
R11F02	attP2	pBPhsFlp2_PEST_brp_SNAP_MCFO_0128	20190423_64_C2	Tue Apr 30 13:13:10 EDT 2019	Sample#2663149798504267874	m	40	40x	Gen1 MCFO (40x)	NA
R11F02	attP2	pBPhsFlp2_PEST_brp_SNAP_MCFO_0128	20190423_64_C3	Tue Apr 30 13:13:10 EDT 2019	Sample#2663149798902726754	f	40	40x	Gen1 MCFO (40x)	NA
R11F02	attP2	pBPhsFlp2_PEST_brp_SNAP_MCFO_0128	20190423_64_C4	Tue Apr 30 13:13:11 EDT 2019	Sample#2663149799305379938	m	40	40x	Gen1 MCFO (40x)	NA
R11F02	attP2	pBPhsFlp2_PEST_brp_SNAP_MCFO_0128	20190423_64_C5	Tue Apr 30 13:13:11 EDT 2019	Sample#2663149799708033122	f	40	40x	Gen1 MCFO (40x)	NA
R11F02	attP2	pBPhsFlp2_PEST_brp_SNAP_MCFO_0128	20190423_64_C6	Tue Apr 30 13:13:11 EDT 2019	Sample#2663149800127463522	m	40	40x	Gen1 MCFO (40x)	NA
R11F02	attP2	pBPhsFlp2_PEST_brp_SNAP_MCFO_0128	20190430_63_D1	Fri May 10 12:00:21 EDT 2019	Sample#2666755351595974693	m		40x	Gen1 MCFO (40x)	NA
R11F02	attP2	pBPhsFlp2_PEST_brp_SNAP_MCFO_0128	20190430_63_D2	Fri May 10 12:00:21 EDT 2019	Sample#2666755352447418405	m		40x	Gen1 MCFO (40x)	NA
R11F02	attP2	pBPhsFlp2_PEST_brp_SNAP_MCFO_0128	20190430_63_D3	Fri May 10 12:00:22 EDT 2019	Sample#2666755352871043109	m		40x	Gen1 MCFO (40x)	NA
R11F02	attP2	pBPhsFlp2_PEST_brp_SNAP_MCFO_0128	20190430_63_D5	Fri May 10 12:00:22 EDT 2019	Sample#2666755354003505189	m		40x	Gen1 MCFO (40x)	NA
R11F02	attP2	pBPhsFlp2_PEST_brp_SNAP_MCFO_0128	20190430_63_D6	Thu May 09 09:18:21 EDT 2019	Sample#2666352192427917410	m		40x	Gen1 MCFO (40x)	NA
R11F02	attP2	pBPhsFlp2_PEST_brp_SNAP_MCFO_0128	20190430_63_E1	Fri May 10 12:00:22 EDT 2019	Sample#2666755354943029285	m		40x	Gen1 MCFO (40x)	NA
R11F02	attP2	pBPhsFlp2_PEST_brp_SNAP_MCFO_0128	20190430_63_E2	Fri May 10 12:00:22 EDT 2019	Sample#2666755355786084389	m		40x	Gen1 MCFO (40x)	NA
R11F02	attP2	pBPhsFlp2_PEST_brp_SNAP_MCFO_0128	20190430_63_F1	Fri May 10 12:00:22 EDT 2019	Sample#2666755356478144549	m		40x	Gen1 MCFO (40x)	NA
R11F02	attP2	pBPhsFlp2_PEST_brp_SNAP_MCFO_0128	20190430_63_F2	Thu May 09 09:18:21 EDT 2019	Sample#2666352192851542114	m		40x	Gen1 MCFO (40x)	NA
R11F02	attP2	pBPhsFlp2_PEST_brp_SNAP_MCFO_0128	20190430_63_F3	Fri May 10 12:00:23 EDT 2019	Sample#2666755357107290149	m		40x	Gen1 MCFO (40x)	NA
R11F02	attP2	pBPhsFlp2_PEST_brp_SNAP_MCFO_0128	20190430_63_F4	Fri May 10 12:00:23 EDT 2019	Sample#2666755357962928165	m		40x	Gen1 MCFO (40x)	NA
R11F02	attP2	pBPhsFlp2_PEST_brp_SNAP_MCFO_0128	20190430_63_F5	Thu May 09 09:18:21 EDT 2019	Sample#2666352193270972514	m		40x	Gen1 MCFO (40x)	NA
R11F02	attP2	pBPhsFlp2_PEST_brp_SNAP_MCFO_0128	20190430_63_F6	Fri May 10 12:00:23 EDT 2019	Sample#2666755359380602917	m		40x	Gen1 MCFO (40x)	NA
R11F02	attP2	pBPhsFlp2_PEST_brp_SNAP_MCFO_0128	20191203_66_B1	Tue Dec 24 13:43:29 EST 2019	Sample#2749420836938055778	m	40	40x	Gen1 MCFO (40x)	NA
R11F02	attP2	pBPhsFlp2_PEST_brp_SNAP_MCFO_0128	20191203_66_B2	Tue Dec 24 13:43:29 EST 2019	Sample#2749420838053740642	m	40	40x	Gen1 MCFO (40x)	NA
R11F02	attP2	pBPhsFlp2_PEST_brp_SNAP_MCFO_0128	20191203_66_B3	Tue Dec 24 13:43:29 EST 2019	Sample#2749420839148453986	m	40	40x	Gen1 MCFO (40x)	NA
R11F02	attP2	pBPhsFlp2_PEST_brp_SNAP_MCFO_0128	20191203_66_B4	Tue Dec 24 13:43:30 EST 2019	Sample#2749420840285110370	m	40	40x	Gen1 MCFO (40x)	NA
R11F02	attP2	pBPhsFlp2_PEST_brp_SNAP_MCFO_0128	20191203_66_B5	Tue Dec 24 13:43:30 EST 2019	Sample#2749420841329492066	m	40	40x	Gen1 MCFO (40x)	NA
R11F02	attP2	pBPhsFlp2_PEST_brp_SNAP_MCFO_0128	20191203_66_B6	Tue Dec 24 13:43:30 EST 2019	Sample#2749420842357096546	m	40	40x	Gen1 MCFO (40x)	NA
R11F02	attP2	pBPhsFlp2_PEST_brp_SNAP_MCFO_0128	20191203_66_B7	Tue Dec 24 13:43:30 EST 2019	Sample#2749420843443421282	m	40	40x	Gen1 MCFO (40x)	NA
R11F03	attP2	57C10PEST_brp_SNAP_MCFO_X23_0099	20181121_62_G1	Thu Dec 20 12:29:59 EST 2018	Sample#2615681219857219682	f		40x	Gen1 MCFO (40x)	NA
R11F03	attP2	57C10PEST_brp_SNAP_MCFO_X23_0099	20181121_62_G2	Thu Dec 20 12:29:59 EST 2018	Sample#2615681220415062114	f		40x	Gen1 MCFO (40x)	NA
R11F03	attP2	57C10PEST_brp_SNAP_MCFO_X23_0099	20181121_62_G3	Thu Dec 20 12:30:00 EST 2018	Sample#2615681220968710242	f		40x	Gen1 MCFO (40x)	NA
R11F03	attP2	57C10PEST_brp_SNAP_MCFO_X23_0099	20181121_62_G4	Thu Dec 20 12:00:20 EST 2018	Sample#2615673758366564450	f		40x	Gen1 MCFO (40x)	NA
R11F03	attP2	57C10PEST_brp_SNAP_MCFO_X23_0099	20181121_62_G5	Thu Dec 20 12:00:35 EST 2018	Sample#2615673821851549794	f		40x	Gen1 MCFO (40x)	NA
R11F03	attP2	57C10PEST_brp_SNAP_MCFO_X23_0099	20181121_62_G6	Thu Dec 20 12:00:36 EST 2018	Sample#2615673822468112482	f		40x	Gen1 MCFO (40x)	NA
R11F05	attP2	57C10PEST_attp8_3stop1	20170120_20_C1	Wed Jan 25 17:18:21 EST 2017	Sample#2364256608587874402	f		20x	Annotator Gen1 MCFO	Gabriella Sterne
R11F05	attP2	57C10PEST_attp8_3stop1	20170120_20_C2	Wed Jan 25 17:18:21 EST 2017	Sample#2364256608717897826	f		20x, 63x	Annotator Gen1 MCFO	Gabriella Sterne
R11F05	attP2	57C10PEST_attp8_3stop1	20170120_20_C3	Wed Jan 25 17:18:21 EST 2017	Sample#2364256608852115554	f		20x	Annotator Gen1 MCFO	Gabriella Sterne
R11F05	attP2	57C10PEST_attp8_3stop1	20170120_20_C4	Wed Jan 25 17:18:21 EST 2017	Sample#2364256608986333282	f		20x, 63x	Annotator Gen1 MCFO	Gabriella Sterne
R11F05	attP2	57C10PEST_attp8_3stop1	20170120_20_C5	Wed Jan 25 17:18:21 EST 2017	Sample#2364256609120551010	f		20x	Annotator Gen1 MCFO	Gabriella Sterne
R11F05	attP2	57C10PEST_attp8_3stop1	20170120_20_C6	Wed Jan 25 17:18:21 EST 2017	Sample#2364256609254768738	f		20x	Annotator Gen1 MCFO	Gabriella Sterne
R11F05	attP2	57C10PEST_attp8_3stop1	20170120_20_C7	Wed Jan 25 17:18:21 EST 2017	Sample#2364256609388986466	f		20x	Annotator Gen1 MCFO	Gabriella Sterne
R11F05	attP2	57C10PEST_attp8_3stop1	20170120_20_C8	Wed Jan 25 17:18:21 EST 2017	Sample#2364256609523204194	f		20x	Annotator Gen1 MCFO	Gabriella Sterne
R11F05	attP2	57C10PEST_brp_SNAP_MCFO_X23_0099	20180828_63_E1	Wed Sep 05 17:25:05 EDT 2018	Sample#2577327268191797346	f		40x	Gen1 MCFO (40x)	NA
R11F05	attP2	57C10PEST_brp_SNAP_MCFO_X23_0099	20180828_63_E2	Wed Sep 05 17:25:05 EDT 2018	Sample#2577327268460232802	f		40x	Gen1 MCFO (40x)	NA
R11F05	attP2	57C10PEST_brp_SNAP_MCFO_X23_0099	20180828_63_E4	Wed Sep 05 17:25:05 EDT 2018	Sample#2577327268997103714	f		40x	Gen1 MCFO (40x)	NA
R11F05	attP2	57C10PEST_brp_SNAP_MCFO_X23_0099	20180828_63_E6	Wed Sep 05 17:25:05 EDT 2018	Sample#2577327269529780322	f		40x	Gen1 MCFO (40x)	NA
R11F07	attP2	57C10PEST_brp_SNAP_MCFO_X23_0099	20190115_65_E1	Wed Jan 30 06:03:08 EST 2019	Sample#2630441767899496546	f		40x	Gen1 MCFO (40x)	NA
R11F07	attP2	57C10PEST_brp_SNAP_MCFO_X23_0099	20190115_65_E2	Wed Jan 30 06:03:08 EST 2019	Sample#2630441769065513058	f		40x	Gen1 MCFO (40x)	NA
R11F07	attP2	57C10PEST_brp_SNAP_MCFO_X23_0099	20190115_65_E3	Wed Jan 30 06:03:08 EST 2019	Sample#2630441764988649570	f		40x	Gen1 MCFO (40x)	NA
R11F07	attP2	57C10PEST_brp_SNAP_MCFO_X23_0099	20190115_65_E4	Wed Jan 30 06:03:08 EST 2019	Sample#2630441766284689506	f		40x	Gen1 MCFO (40x)	NA
R11F07	attP2	57C10PEST_brp_SNAP_MCFO_X23_0099	20190115_65_E5	Wed Jan 30 06:03:08 EST 2019	Sample#2630441767811416162	f		40x	Gen1 MCFO (40x)	NA
R11F07	attP2	57C10PEST_brp_SNAP_MCFO_X23_0099	20190115_65_E6	Wed Jan 30 06:03:08 EST 2019	Sample#2630441769061318754	f		40x	Gen1 MCFO (40x)	NA
R11F07	attP2	pBPhsFlp2_PEST_brp_SNAP_MCFO_0128	20190816_65_C1	Fri Sep 20 10:16:55 EDT 2019	Sample#2714926906431504482	m	13	40x	Gen1 MCFO (40x)	NA
R11F07	attP2	pBPhsFlp2_PEST_brp_SNAP_MCFO_0128	20190816_65_C2	Fri Sep 20 10:16:55 EDT 2019	Sample#2714926906947403874	m	13	40x	Gen1 MCFO (40x)	NA
R11F07	attP2	pBPhsFlp2_PEST_brp_SNAP_MCFO_0128	20190816_65_C3	Fri Sep 20 10:16:55 EDT 2019	Sample#2714926907438137442	m	13	40x	Gen1 MCFO (40x)	NA
R11F07	attP2	pBPhsFlp2_PEST_brp_SNAP_MCFO_0128	20190816_65_C4	Fri Sep 20 10:16:55 EDT 2019	Sample#2714926907924676706	m	13	40x	Gen1 MCFO (40x)	NA
R11F07	attP2	pBPhsFlp2_PEST_brp_SNAP_MCFO_0128	20190816_65_C5	Fri Sep 20 10:16:55 EDT 2019	Sample#2714926908419604578	m	13	40x	Gen1 MCFO (40x)	NA
R11F07	attP2	pBPhsFlp2_PEST_brp_SNAP_MCFO_0128	20190816_65_C6	Fri Sep 20 10:16:55 EDT 2019	Sample#2714926908860006498	m	13	40x	Gen1 MCFO (40x)	NA
R11F07	attP2	pBPhsFlp2_PEST_brp_SNAP_MCFO_0128	20190816_65_D1	Fri Sep 20 10:16:56 EDT 2019	Sample#2714926909300408418	m	13	40x	Gen1 MCFO (40x)	NA
R11F07	attP2	pBPhsFlp2_PEST_brp_SNAP_MCFO_0128	20190816_65_D2	Fri Sep 20 10:16:56 EDT 2019	Sample#2714926909736616034	m	13	40x	Gen1 MCFO (40x)	NA
R11F07	attP2	pBPhsFlp2_PEST_brp_SNAP_MCFO_0128	20190816_65_D3	Fri Sep 20 10:16:56 EDT 2019	Sample#2714926910172823650	m	13	40x	Gen1 MCFO (40x)	NA
R11F07	attP2	pBPhsFlp2_PEST_brp_SNAP_MCFO_0128	20190816_65_D4	Fri Sep 20 10:16:56 EDT 2019	Sample#2714926910609031266	m	13	40x	Gen1 MCFO (40x)	NA
R11F07	attP2	pBPhsFlp2_PEST_brp_SNAP_MCFO_0128	20190816_65_D5	Fri Sep 20 10:16:56 EDT 2019	Sample#2714926911049433186	m	13	40x	Gen1 MCFO (40x)	NA
R11F09	attP2	57C10PEST_attp18_4stop1	20161028_28_E1	Sun Nov 13 18:23:49 EST 2016	Sample#2337818770656985233	m	15	20x	Annotator Gen1 MCFO	Ryo Minegishi
R11F09	attP2	57C10PEST_attp18_4stop1	20161028_28_E2	Sun Nov 13 18:23:49 EST 2016	Sample#2337818772422787217	m	15	20x	Annotator Gen1 MCFO	Ryo Minegishi
R11F09	attP2	57C10PEST_attp18_4stop1	20161028_28_E3	Sun Nov 13 18:23:50 EST 2016	Sample#2337818774121480337	m	15	20x	Annotator Gen1 MCFO	Ryo Minegishi
R11F09	attP2	57C10PEST_attp18_4stop1	20161028_28_E4	Sun Nov 13 18:23:50 EST 2016	Sample#2337818776684200081	m	15	20x	Annotator Gen1 MCFO	Ryo Minegishi
R11F09	attP2	57C10PEST_attp18_4stop1	20161028_28_E5	Sun Nov 13 18:23:51 EST 2016	Sample#2337818779280474257	m	15	20x	Annotator Gen1 MCFO	Ryo Minegishi
R11F09	attP2	57C10PEST_attp18_4stop1	20161028_28_E6	Sun Nov 13 18:23:52 EST 2016	Sample#2337818781507649681	m	15	20x	Annotator Gen1 MCFO	Ryo Minegishi
R11F09	attP2	57C10PEST_attp18_4stop1	20161028_28_F1	Sun Nov 13 18:23:52 EST 2016	Sample#2337818783508332689	m	15	20x	Annotator Gen1 MCFO	Ryo Minegishi
R11F12	attP2	57C10PEST_brp_SNAP_MCFO_X23_0099	20180828_63_F1	Wed Sep 05 17:25:05 EDT 2018	Sample#2577327269798215778	f		40x	Gen1 MCFO (40x)	NA
R11F12	attP2	57C10PEST_brp_SNAP_MCFO_X23_0099	20180828_63_F2	Wed Sep 05 17:25:05 EDT 2018	Sample#2577327270062456930	f		40x	Gen1 MCFO (40x)	NA
R11F12	attP2	57C10PEST_brp_SNAP_MCFO_X23_0099	20180828_63_F3	Wed Sep 05 17:25:05 EDT 2018	Sample#2577327270330892386	f		40x	Gen1 MCFO (40x)	NA
R11F12	attP2	57C10PEST_brp_SNAP_MCFO_X23_0099	20180828_63_F4	Wed Sep 05 17:25:05 EDT 2018	Sample#2577327270595133538	f		40x	Gen1 MCFO (40x)	NA
R11F12	attP2	57C10PEST_brp_SNAP_MCFO_X23_0099	20180828_63_F5	Wed Sep 05 17:25:05 EDT 2018	Sample#2577327270859374690	f		40x	Gen1 MCFO (40x)	NA
R11F12	attP2	57C10PEST_brp_SNAP_MCFO_X23_0099	20180828_63_F6	Wed Sep 05 17:25:05 EDT 2018	Sample#2577327271123615842	f		40x	Gen1 MCFO (40x)	NA
R11G01	attP2	57C10PEST_brp_SNAP_MCFO_X23_0099	20181121_62_H1	Thu Dec 20 12:00:36 EST 2018	Sample#2615673823000789090	f		40x	Gen1 MCFO (40x)	NA
R11G01	attP2	57C10PEST_brp_SNAP_MCFO_X23_0099	20181121_62_H2	Thu Dec 20 12:00:36 EST 2018	Sample#2615673823583797346	f		40x	Gen1 MCFO (40x)	NA
R11G01	attP2	57C10PEST_brp_SNAP_MCFO_X23_0099	20181121_62_H3	Thu Dec 20 12:00:41 EST 2018	Sample#2615673846514057314	f		40x	Gen1 MCFO (40x)	NA
R11G01	attP2	57C10PEST_brp_SNAP_MCFO_X23_0099	20181121_62_H4	Thu Dec 20 12:00:42 EST 2018	Sample#2615673847080288354	f		40x	Gen1 MCFO (40x)	NA
R11G01	attP2	57C10PEST_brp_SNAP_MCFO_X23_0099	20181121_62_H5	Thu Dec 20 12:00:42 EST 2018	Sample#2615673847612964962	f		40x	Gen1 MCFO (40x)	NA
R11G01	attP2	57C10PEST_brp_SNAP_MCFO_X23_0099	20181121_62_H6	Thu Dec 20 12:00:42 EST 2018	Sample#2615673848166613090	f		40x	Gen1 MCFO (40x)	NA
R11G01	attP2	pBPhsFlp2_PEST_brp_SNAP_MCFO_0128	20191022_63_C1	Mon Nov 04 18:57:31 EST 2019	Sample#2731380472511725666	m	40	40x	Gen1 MCFO (40x)	NA
R11G01	attP2	pBPhsFlp2_PEST_brp_SNAP_MCFO_0128	20191022_63_C2	Mon Nov 04 18:57:58 EST 2019	Sample#2731380586571628642	m	40	40x	Gen1 MCFO (40x)	NA
R11G01	attP2	pBPhsFlp2_PEST_brp_SNAP_MCFO_0128	20191022_63_C3	Mon Nov 04 18:57:58 EST 2019	Sample#2731380587574067298	m	40	40x	Gen1 MCFO (40x)	NA
R11G01	attP2	pBPhsFlp2_PEST_brp_SNAP_MCFO_0128	20191022_63_C4	Mon Nov 04 18:57:58 EST 2019	Sample#2731380588425511010	m	40	40x	Gen1 MCFO (40x)	NA
R11G01	attP2	pBPhsFlp2_PEST_brp_SNAP_MCFO_0128	20191022_63_C5	Mon Nov 04 18:57:59 EST 2019	Sample#2731380589272760418	m	40	40x	Gen1 MCFO (40x)	NA
R11G01	attP2	pBPhsFlp2_PEST_brp_SNAP_MCFO_0128	20191022_63_C6	Mon Nov 04 18:57:59 EST 2019	Sample#2731380590132592738	m	40	40x	Gen1 MCFO (40x)	NA
R11G01	attP2	pBPhsFlp2_PEST_brp_SNAP_MCFO_0128	20191022_63_C7	Mon Nov 04 18:57:59 EST 2019	Sample#2731380590988230754	m	40	40x	Gen1 MCFO (40x)	NA
R11G03	attP2	57C10PEST_brp_SNAP_MCFO_X23_0099	20181113_61_G1	Tue Nov 20 17:21:45 EST 2018	Sample#2604883008611680354	f		40x	Gen1 MCFO (40x)	NA
R11G03	attP2	57C10PEST_brp_SNAP_MCFO_X23_0099	20181113_61_G2	Tue Nov 20 17:21:51 EST 2018	Sample#2604883032087199842	f		40x	Gen1 MCFO (40x)	NA
R11G03	attP2	57C10PEST_brp_SNAP_MCFO_X23_0099	20181113_61_G3	Tue Nov 20 17:21:51 EST 2018	Sample#2604883032766677090	f		40x	Gen1 MCFO (40x)	NA
R11G03	attP2	57C10PEST_brp_SNAP_MCFO_X23_0099	20181113_61_G4	Tue Nov 20 17:21:51 EST 2018	Sample#2604883033249022050	f		40x	Gen1 MCFO (40x)	NA
R11G03	attP2	57C10PEST_brp_SNAP_MCFO_X23_0099	20181113_61_G5	Tue Nov 20 17:21:51 EST 2018	Sample#2604883033781698658	f		40x	Gen1 MCFO (40x)	NA
R11G03	attP2	57C10PEST_brp_SNAP_MCFO_X23_0099	20181113_61_G6	Tue Nov 20 17:21:51 EST 2018	Sample#2604883034322763874	f		40x	Gen1 MCFO (40x)	NA
R11G03	attP2	57C10PEST_brp_SNAP_MCFO_X23_0099	20181113_61_H1	Tue Nov 20 17:21:51 EST 2018	Sample#2604883034888994914	f		40x	Gen1 MCFO (40x)	NA
R11G03	attP2	pBPhsFlp2_PEST_brp_SNAP_MCFO_0128	20191022_61_I1	Mon Nov 04 18:08:52 EST 2019	Sample#2731368232408580194	m	40	40x	Gen1 MCFO (40x)	NA
R11G03	attP2	pBPhsFlp2_PEST_brp_SNAP_MCFO_0128	20191022_61_I2	Mon Nov 04 18:08:53 EST 2019	Sample#2731368233306161250	m	40	40x	Gen1 MCFO (40x)	NA
R11G03	attP2	pBPhsFlp2_PEST_brp_SNAP_MCFO_0128	20191022_61_I3	Mon Nov 04 18:08:53 EST 2019	Sample#2731368234203742306	m	40	40x	Gen1 MCFO (40x)	NA
R11G03	attP2	pBPhsFlp2_PEST_brp_SNAP_MCFO_0128	20191022_61_I4	Mon Nov 04 18:08:53 EST 2019	Sample#2731368235050991714	m	40	40x	Gen1 MCFO (40x)	NA
R11G03	attP2	pBPhsFlp2_PEST_brp_SNAP_MCFO_0128	20191022_61_I5	Mon Nov 04 18:08:53 EST 2019	Sample#2731368235902435426	m	40	40x	Gen1 MCFO (40x)	NA
R11G03	attP2	pBPhsFlp2_PEST_brp_SNAP_MCFO_0128	20191022_61_I6	Mon Nov 04 18:08:54 EST 2019	Sample#2731368236745490530	m	40	40x	Gen1 MCFO (40x)	NA
R11G03	attP2	pBPhsFlp2_PEST_brp_SNAP_MCFO_0128	20191022_61_I7	Mon Nov 04 18:08:54 EST 2019	Sample#2731368237596934242	m	40	40x	Gen1 MCFO (40x)	NA
R11G08	attP2	57C10PEST_brp_SNAP_MCFO_X23_0099	20180828_63_G1	Wed Sep 05 17:25:05 EDT 2018	Sample#2577327271392051298	f		40x	Gen1 MCFO (40x)	NA
R11G08	attP2	57C10PEST_brp_SNAP_MCFO_X23_0099	20180828_63_G2	Wed Sep 05 17:25:05 EDT 2018	Sample#2577327271656292450	f		40x	Gen1 MCFO (40x)	NA
R11G08	attP2	57C10PEST_brp_SNAP_MCFO_X23_0099	20180828_63_G3	Wed Sep 05 17:25:06 EDT 2018	Sample#2577327271924727906	f		40x	Gen1 MCFO (40x)	NA
R11G08	attP2	57C10PEST_brp_SNAP_MCFO_X23_0099	20180828_63_G4	Wed Sep 05 17:25:06 EDT 2018	Sample#2577327272188969058	f		40x	Gen1 MCFO (40x)	NA
R11G08	attP2	57C10PEST_brp_SNAP_MCFO_X23_0099	20180828_63_G5	Wed Sep 05 17:25:06 EDT 2018	Sample#2577327272457404514	f		40x	Gen1 MCFO (40x)	NA
R11G08	attP2	57C10PEST_brp_SNAP_MCFO_X23_0099	20180828_63_G6	Wed Sep 05 17:25:06 EDT 2018	Sample#2577327272721645666	f		40x	Gen1 MCFO (40x)	NA
R11G08	attP2	57C10PEST_brp_SNAP_MCFO_X23_0099	20180828_63_H1	Wed Sep 05 17:25:06 EDT 2018	Sample#2577327272985886818	f		40x	Gen1 MCFO (40x)	NA
R11G09	attP2	hsPESTOPT_attP3_3stop1_X_0036	20160513_26_A1	Wed Jun 15 15:08:54 EDT 2016	Sample#2283034048609648677	f	15	20x, 63x	Annotator Gen1 MCFO	Shigehiro Namiki
R11G09	attP2	hsPESTOPT_attP3_3stop1_X_0036	20160513_26_A2	Fri May 20 09:48:49 EDT 2016	Sample#2273531412734804066	f	15	20x	Annotator Gen1 MCFO	Shigehiro Namiki
R11G09	attP2	hsPESTOPT_attP3_3stop1_X_0036	20160513_26_A3	Wed Jun 15 15:09:05 EDT 2016	Sample#2283034094864433189	f	15	20x, 63x	Annotator Gen1 MCFO	Shigehiro Namiki
R11G09	attP2	hsPESTOPT_attP3_3stop1_X_0036	20160513_26_A4	Fri May 20 09:48:50 EDT 2016	Sample#2273531417914769506	f	15	20x	Annotator Gen1 MCFO	Shigehiro Namiki
R11G09	attP2	57C10PEST_brp_SNAP_MCFO_X23_0099	20180828_63_I1	Wed Sep 05 17:25:06 EDT 2018	Sample#2577327273250127970	f		40x	Gen1 MCFO (40x)	NA
R11G09	attP2	57C10PEST_brp_SNAP_MCFO_X23_0099	20180828_63_I3	Wed Sep 05 17:25:06 EDT 2018	Sample#2577327273510174818	f		40x	Gen1 MCFO (40x)	NA
R11G09	attP2	57C10PEST_brp_SNAP_MCFO_X23_0099	20180828_63_I4	Wed Sep 05 17:25:06 EDT 2018	Sample#2577327273791193186	f		40x	Gen1 MCFO (40x)	NA
R11G09	attP2	57C10PEST_brp_SNAP_MCFO_X23_0099	20180828_63_I5	Wed Sep 05 17:25:06 EDT 2018	Sample#2577327274026074210	f		40x	Gen1 MCFO (40x)	NA
R11G09	attP2	57C10PEST_brp_SNAP_MCFO_X23_0099	20180828_63_I6	Wed Sep 05 17:25:06 EDT 2018	Sample#2577327274298703970	f		40x	Gen1 MCFO (40x)	NA
R11G09	attP2	pBPhsFlp2_PEST_brp_SNAP_MCFO_0128	20191203_66_C1	Tue Dec 24 13:43:31 EST 2019	Sample#2749420844550717538	m	40	40x	Gen1 MCFO (40x)	NA
R11G09	attP2	pBPhsFlp2_PEST_brp_SNAP_MCFO_0128	20191203_66_C2	Tue Dec 24 13:43:31 EST 2019	Sample#2749420845653819490	m	40	40x	Gen1 MCFO (40x)	NA
R11G09	attP2	pBPhsFlp2_PEST_brp_SNAP_MCFO_0128	20191203_66_C3	Tue Dec 24 13:43:31 EST 2019	Sample#2749420846756921442	m	40	40x	Gen1 MCFO (40x)	NA
R11G09	attP2	pBPhsFlp2_PEST_brp_SNAP_MCFO_0128	20191203_66_C4	Tue Dec 24 12:47:27 EST 2019	Sample#2749406737546084450	m	40	40x	Gen1 MCFO (40x)	NA
R11G09	attP2	pBPhsFlp2_PEST_brp_SNAP_MCFO_0128	20191203_66_C5	Tue Dec 24 12:47:27 EST 2019	Sample#2749406738607243362	m	40	40x	Gen1 MCFO (40x)	NA
R11G09	attP2	pBPhsFlp2_PEST_brp_SNAP_MCFO_0128	20191203_66_C6	Tue Dec 24 12:47:28 EST 2019	Sample#2749406739639042146	m	40	40x	Gen1 MCFO (40x)	NA
R11H10	attP2	57C10PEST_attp18_4stop1	20160205_19_E1	Wed Feb 10 14:06:43 EST 2016	Sample#2237372630275457098	f		20x	Annotator Gen1 MCFO	Masayoshi Ito
R11H10	attP2	57C10PEST_attp18_4stop1	20160205_19_E2	Sun Feb 28 14:37:26 EST 2016	Sample#2243903341060948066	f		20x, 63x	Annotator Gen1 MCFO	Masayoshi Ito
R11H10	attP2	57C10PEST_attp18_4stop1	20160205_19_E3	Sun Feb 28 14:37:31 EST 2016	Sample#2243903364045733986	f		20x, 63x	Annotator Gen1 MCFO	Masayoshi Ito
R11H10	attP2	57C10PEST_attp18_4stop1	20160205_19_E4	Wed Feb 10 14:06:43 EST 2016	Sample#2237372631332421706	f		20x	Annotator Gen1 MCFO	Masayoshi Ito
R11H10	attP2	57C10PEST_attp18_4stop1	20160205_19_E5	Wed Feb 10 14:06:43 EST 2016	Sample#2237372631638605898	f		20x	Annotator Gen1 MCFO	Masayoshi Ito
R11H10	attP2	57C10PEST_attp18_4stop1	20160205_19_E6	Sun Feb 28 14:37:35 EST 2016	Sample#2243903381238186082	f		20x, 63x	Annotator Gen1 MCFO	Masayoshi Ito
R11H10	attP2	57C10PEST_attp18_4stop1	20160205_19_E7	Wed Feb 10 14:06:43 EST 2016	Sample#2237372632250974282	f		20x	Annotator Gen1 MCFO	Masayoshi Ito
R11H10	attP2	57C10PEST_attp18_4stop1	20160205_19_E8	Wed Feb 10 14:06:43 EST 2016	Sample#2237372632548769866	f		20x	Annotator Gen1 MCFO	Masayoshi Ito
R11H10	attP2	57C10PEST_attp18_4stop1	20161223_19_A1	Mon Jan 02 12:50:57 EST 2017	Sample#2355854394303447138	m	15	20x, 63x	Annotator Gen1 MCFO	Ryo Minegishi
R11H10	attP2	57C10PEST_attp18_4stop1	20161223_19_A2	Mon Jan 02 12:50:57 EST 2017	Sample#2355854394521550946	m	15	20x, 63x	Annotator Gen1 MCFO	Ryo Minegishi
R11H10	attP2	57C10PEST_attp18_4stop1	20161223_19_A3	Mon Jan 02 12:50:57 EST 2017	Sample#2355854394731266146	m	15	20x, 63x	Annotator Gen1 MCFO	Ryo Minegishi
R11H10	attP2	57C10PEST_attp18_4stop1	20161223_19_A4	Mon Jan 02 12:50:57 EST 2017	Sample#2355854394940981346	m	15	20x, 63x	Annotator Gen1 MCFO	Ryo Minegishi
R11H10	attP2	57C10PEST_attp18_4stop1	20161223_19_A5	Mon Jan 02 12:50:57 EST 2017	Sample#2355854395154890850	m	15	20x, 63x	Annotator Gen1 MCFO	Ryo Minegishi
R11H10	attP2	57C10PEST_attp18_4stop1	20161223_19_A6	Mon Jan 02 12:50:57 EST 2017	Sample#2355854395360411746	m	15	20x, 63x	Annotator Gen1 MCFO	Ryo Minegishi
R11H10	attP2	57C10PEST_brp_SNAP_MCFO_X23_0099	20181121_62_I1	Thu Dec 20 12:00:42 EST 2018	Sample#2615673848720261218	f		40x	Gen1 MCFO (40x)	NA
R11H10	attP2	57C10PEST_brp_SNAP_MCFO_X23_0099	20181121_62_I2	Thu Dec 20 12:00:42 EST 2018	Sample#2615673849269715042	f		40x	Gen1 MCFO (40x)	NA
R11H10	attP2	57C10PEST_brp_SNAP_MCFO_X23_0099	20181121_62_I3	Thu Dec 20 12:01:21 EST 2018	Sample#2615674012176482402	f		40x	Gen1 MCFO (40x)	NA
R11H10	attP2	57C10PEST_brp_SNAP_MCFO_X23_0099	20181121_62_I4	Thu Dec 20 12:01:21 EST 2018	Sample#2615674012826599522	f		40x	Gen1 MCFO (40x)	NA
R11H10	attP2	57C10PEST_brp_SNAP_MCFO_X23_0099	20181121_62_I5	Thu Dec 20 12:01:27 EST 2018	Sample#2615674036235010146	f		40x	Gen1 MCFO (40x)	NA
R11H10	attP2	57C10PEST_brp_SNAP_MCFO_X23_0099	20181121_62_I6	Thu Dec 20 12:01:37 EST 2018	Sample#2615674081160200290	f		40x	Gen1 MCFO (40x)	NA
R11H10	attP2	pBPhsFlp2_PEST_brp_SNAP_MCFO_0128	20191022_63_D1	Mon Nov 04 18:57:59 EST 2019	Sample#2731380591839674466	m	40	40x	Gen1 MCFO (40x)	NA
R11H10	attP2	pBPhsFlp2_PEST_brp_SNAP_MCFO_0128	20191022_63_D2	Mon Nov 04 18:57:59 EST 2019	Sample#2731380592766615650	m	40	40x	Gen1 MCFO (40x)	NA
R11H10	attP2	pBPhsFlp2_PEST_brp_SNAP_MCFO_0128	20191022_63_D3	Mon Nov 04 18:58:00 EST 2019	Sample#2731380593680973922	m	40	40x	Gen1 MCFO (40x)	NA
R11H10	attP2	pBPhsFlp2_PEST_brp_SNAP_MCFO_0128	20191022_63_D4	Mon Nov 04 18:58:00 EST 2019	Sample#2731380594545000546	m	40	40x	Gen1 MCFO (40x)	NA
R11H10	attP2	pBPhsFlp2_PEST_brp_SNAP_MCFO_0128	20191022_63_D5	Mon Nov 04 18:58:00 EST 2019	Sample#2731380595396444258	m	40	40x	Gen1 MCFO (40x)	NA
R11H10	attP2	pBPhsFlp2_PEST_brp_SNAP_MCFO_0128	20191022_63_D6	Mon Nov 04 18:58:00 EST 2019	Sample#2731380596235305058	m	40	40x	Gen1 MCFO (40x)	NA
R11H10	attP2	pBPhsFlp2_PEST_brp_SNAP_MCFO_0128	20191022_63_D7	Mon Nov 04 18:58:00 EST 2019	Sample#2731380597090943074	m	40	40x	Gen1 MCFO (40x)	NA
R11H11	attP2	57C10PEST_brp_SNAP_MCFO_X23_0099	20180828_63_J1	Wed Sep 05 17:25:06 EDT 2018	Sample#2577327274567139426	f		40x	Gen1 MCFO (40x)	NA
R11H11	attP2	57C10PEST_brp_SNAP_MCFO_X23_0099	20180828_63_J2	Wed Sep 05 17:25:06 EDT 2018	Sample#2577327274839769186	f		40x	Gen1 MCFO (40x)	NA
R11H11	attP2	57C10PEST_brp_SNAP_MCFO_X23_0099	20180828_63_J3	Wed Sep 05 17:25:06 EDT 2018	Sample#2577327275112398946	f		40x	Gen1 MCFO (40x)	NA
R11H11	attP2	57C10PEST_brp_SNAP_MCFO_X23_0099	20180828_63_J4	Wed Sep 05 17:25:06 EDT 2018	Sample#2577327275380834402	f		40x	Gen1 MCFO (40x)	NA
R11H11	attP2	57C10PEST_brp_SNAP_MCFO_X23_0099	20180828_63_J5	Wed Sep 05 17:25:06 EDT 2018	Sample#2577327275624104034	f		40x	Gen1 MCFO (40x)	NA
R11H11	attP2	57C10PEST_brp_SNAP_MCFO_X23_0099	20180828_63_J6	Wed Sep 05 17:25:06 EDT 2018	Sample#2577327275892539490	f		40x	Gen1 MCFO (40x)	NA
R11H11	attP2	pBPhsFlp2_PEST_brp_SNAP_MCFO_0128	20191203_66_D1	Tue Dec 24 12:47:28 EST 2019	Sample#2749406740675035234	m	40	40x	Gen1 MCFO (40x)	NA
R11H11	attP2	pBPhsFlp2_PEST_brp_SNAP_MCFO_0128	20191203_66_D2	Tue Dec 24 12:47:28 EST 2019	Sample#2749406741778137186	m	40	40x	Gen1 MCFO (40x)	NA
R11H11	attP2	pBPhsFlp2_PEST_brp_SNAP_MCFO_0128	20191203_66_D3	Tue Dec 24 12:47:29 EST 2019	Sample#2749406742872850530	m	40	40x	Gen1 MCFO (40x)	NA
R11H11	attP2	pBPhsFlp2_PEST_brp_SNAP_MCFO_0128	20191203_66_D4	Tue Dec 24 12:47:29 EST 2019	Sample#2749406743904649314	m	40	40x	Gen1 MCFO (40x)	NA
R11H11	attP2	pBPhsFlp2_PEST_brp_SNAP_MCFO_0128	20191203_66_D5	Tue Dec 24 12:47:29 EST 2019	Sample#2749406744940642402	m	40	40x	Gen1 MCFO (40x)	NA
R11H11	attP2	pBPhsFlp2_PEST_brp_SNAP_MCFO_0128	20191203_66_D6	Tue Dec 24 12:47:29 EST 2019	Sample#2749406745980829794	m	40	40x	Gen1 MCFO (40x)	NA
R11H11	attP2	pBPhsFlp2_PEST_brp_SNAP_MCFO_0128	20191203_66_D7	Tue Dec 24 12:47:29 EST 2019	Sample#2749406747012628578	m	40	40x	Gen1 MCFO (40x)	NA
R12A07	attP2	57C10PEST_brp_SNAP_MCFO_X23_0099	20181109_62_I1	Tue Nov 27 16:55:10 EST 2018	Sample#2607413031713374306	f		40x	Gen1 MCFO (40x)	NA
R12A10	attP2	57C10PEST_brp_SNAP_MCFO_X23_0099	20180831_61_A1	Wed Sep 19 13:57:29 EDT 2018	Sample#2582348455657603170	f		40x	Gen1 MCFO (40x)	NA
R12A10	attP2	57C10PEST_brp_SNAP_MCFO_X23_0099	20180831_61_A2	Wed Sep 19 13:57:29 EDT 2018	Sample#2582348455997341794	f		40x	Gen1 MCFO (40x)	NA
R12A10	attP2	57C10PEST_brp_SNAP_MCFO_X23_0099	20180831_61_A3	Wed Sep 19 13:57:29 EDT 2018	Sample#2582348456295137378	f		40x	Gen1 MCFO (40x)	NA
R12A10	attP2	57C10PEST_brp_SNAP_MCFO_X23_0099	20180831_61_A4	Wed Sep 19 13:57:29 EDT 2018	Sample#2582348456588738658	f		40x	Gen1 MCFO (40x)	NA
R12A10	attP2	57C10PEST_brp_SNAP_MCFO_X23_0099	20180831_61_A5	Wed Sep 19 13:57:29 EDT 2018	Sample#2582348456886534242	f		40x	Gen1 MCFO (40x)	NA
R12A10	attP2	57C10PEST_brp_SNAP_MCFO_X23_0099	20180831_61_A6	Wed Sep 19 13:57:29 EDT 2018	Sample#2582348457184329826	f		40x	Gen1 MCFO (40x)	NA
R12A10	attP2	pBPhsFlp2_PEST_brp_SNAP_MCFO_0128	20191218_62_D1	Tue Dec 24 13:52:59 EST 2019	Sample#2749423228874129506	m	40	40x	Gen1 MCFO (40x)	NA
R12A10	attP2	pBPhsFlp2_PEST_brp_SNAP_MCFO_0128	20191218_62_D2	Tue Dec 24 13:52:59 EST 2019	Sample#2749423229947871330	m	40	40x	Gen1 MCFO (40x)	NA
R12A10	attP2	pBPhsFlp2_PEST_brp_SNAP_MCFO_0128	20191218_62_D3	Tue Dec 24 13:53:00 EST 2019	Sample#2749423231025807458	m	40	40x	Gen1 MCFO (40x)	NA
R12A10	attP2	pBPhsFlp2_PEST_brp_SNAP_MCFO_0128	20191218_62_D4	Tue Dec 24 13:53:00 EST 2019	Sample#2749423232036634722	m	40	40x	Gen1 MCFO (40x)	NA
R12A10	attP2	pBPhsFlp2_PEST_brp_SNAP_MCFO_0128	20191218_62_D5	Tue Dec 24 13:53:00 EST 2019	Sample#2749423233047461986	m	40	40x	Gen1 MCFO (40x)	NA
R12A10	attP2	pBPhsFlp2_PEST_brp_SNAP_MCFO_0128	20191218_62_D6	Tue Dec 24 13:53:00 EST 2019	Sample#2749423234054094946	m	40	40x	Gen1 MCFO (40x)	NA
R12A10	attP2	pBPhsFlp2_PEST_brp_SNAP_MCFO_0128	20191218_62_D7	Tue Dec 24 13:53:01 EST 2019	Sample#2749423235073310818	m	40	40x	Gen1 MCFO (40x)	NA
R12A11	attP2	57C10PEST_attp18_4stop1	20161222_22_A1	Wed Jan 04 15:29:52 EST 2017	Sample#2356619164916908130	f		20x	Annotator Gen1 MCFO	Jens Goldammer
R12A11	attP2	57C10PEST_attp18_4stop1	20161222_22_A2	Wed Jan 04 15:29:52 EST 2017	Sample#2356619165063708770	f		20x	Annotator Gen1 MCFO	Jens Goldammer
R12A11	attP2	57C10PEST_attp18_4stop1	20161222_22_A3	Wed Jan 04 15:29:52 EST 2017	Sample#2356619165206315106	f		20x	Annotator Gen1 MCFO	Jens Goldammer
R12A11	attP2	57C10PEST_attp18_4stop1	20161222_22_A4	Wed Jan 04 15:29:52 EST 2017	Sample#2356619165348921442	f		20x	Annotator Gen1 MCFO	Jens Goldammer
R12A11	attP2	57C10PEST_attp18_4stop1	20161222_22_A5	Wed Jan 04 15:29:52 EST 2017	Sample#2356619165491527778	f		20x	Annotator Gen1 MCFO	Jens Goldammer
R12A11	attP2	57C10PEST_attp18_4stop1	20161222_22_A6	Wed Jan 04 15:29:52 EST 2017	Sample#2356619165629939810	f		20x	Annotator Gen1 MCFO	Jens Goldammer
R12A11	attP2	57C10PEST_attp18_4stop1	20161222_22_A7	Wed Jan 04 15:29:52 EST 2017	Sample#2356619165772546146	f		20x	Annotator Gen1 MCFO	Jens Goldammer
R12A11	attP2	57C10PEST_attp18_4stop1	20161222_22_A8	Wed Jan 04 15:29:53 EST 2017	Sample#2356619165910958178	f		20x	Annotator Gen1 MCFO	Jens Goldammer
R12A12	attP2	57C10PEST_brp_SNAP_MCFO_X23_0099	20181121_63_A1	Mon Dec 17 15:08:51 EST 2018	Sample#2614634034315133026	f		40x	Gen1 MCFO (40x)	NA
R12A12	attP2	57C10PEST_brp_SNAP_MCFO_X23_0099	20181121_63_A2	Mon Dec 17 15:08:51 EST 2018	Sample#2614634035460178018	f		40x	Gen1 MCFO (40x)	NA
R12A12	attP2	57C10PEST_brp_SNAP_MCFO_X23_0099	20181121_63_A3	Mon Dec 17 15:08:51 EST 2018	Sample#2614634036047380578	f		40x	Gen1 MCFO (40x)	NA
R12A12	attP2	57C10PEST_brp_SNAP_MCFO_X23_0099	20181121_63_A4	Mon Dec 17 15:08:51 EST 2018	Sample#2614634036609417314	f		40x	Gen1 MCFO (40x)	NA
R12A12	attP2	57C10PEST_brp_SNAP_MCFO_X23_0099	20181121_63_A5	Mon Dec 17 15:08:52 EST 2018	Sample#2614634037171454050	f		40x	Gen1 MCFO (40x)	NA
R12A12	attP2	57C10PEST_brp_SNAP_MCFO_X23_0099	20181121_63_A6	Mon Dec 17 15:08:52 EST 2018	Sample#2614634037737685090	f		40x	Gen1 MCFO (40x)	NA
R12A12	attP2	pBPhsFlp2_PEST_brp_SNAP_MCFO_0128	20191022_63_E1	Mon Nov 04 18:58:01 EST 2019	Sample#2731380597942386786	m	40	40x	Gen1 MCFO (40x)	NA
R12A12	attP2	pBPhsFlp2_PEST_brp_SNAP_MCFO_0128	20191022_63_E2	Mon Nov 04 18:58:01 EST 2019	Sample#2731380598886105186	m	40	40x	Gen1 MCFO (40x)	NA
R12A12	attP2	pBPhsFlp2_PEST_brp_SNAP_MCFO_0128	20191022_63_E3	Mon Nov 04 18:58:01 EST 2019	Sample#2731380599813046370	m	40	40x	Gen1 MCFO (40x)	NA
R12A12	attP2	pBPhsFlp2_PEST_brp_SNAP_MCFO_0128	20191022_63_E4	Mon Nov 04 18:58:01 EST 2019	Sample#2731380600677072994	m	40	40x	Gen1 MCFO (40x)	NA
R12A12	attP2	pBPhsFlp2_PEST_brp_SNAP_MCFO_0128	20191022_63_E5	Mon Nov 04 18:58:02 EST 2019	Sample#2731380601528516706	m	40	40x	Gen1 MCFO (40x)	NA
R12A12	attP2	pBPhsFlp2_PEST_brp_SNAP_MCFO_0128	20191022_63_E6	Mon Nov 04 18:58:02 EST 2019	Sample#2731380602384154722	m	40	40x	Gen1 MCFO (40x)	NA
R12A12	attP2	pBPhsFlp2_PEST_brp_SNAP_MCFO_0128	20191022_63_E7	Mon Nov 04 18:58:02 EST 2019	Sample#2731380603227209826	m	40	40x	Gen1 MCFO (40x)	NA
R12B01	attP2	57C10PEST_brp_SNAP_MCFO_X23_0099	20180831_61_B1	Wed Sep 19 13:57:29 EDT 2018	Sample#2582348457477931106	f		40x	Gen1 MCFO (40x)	NA
R12B01	attP2	57C10PEST_brp_SNAP_MCFO_X23_0099	20180831_61_B4	Wed Sep 19 13:57:30 EDT 2018	Sample#2582348457725395042	f		40x	Gen1 MCFO (40x)	NA
R12B01	attP2	pBPhsFlp2_PEST_brp_SNAP_MCFO_0128	20191203_66_E4	Tue Dec 24 12:47:30 EST 2019	Sample#2749406749428547682	m	40	40x	Gen1 MCFO (40x)	NA
R12B01	attP2	pBPhsFlp2_PEST_brp_SNAP_MCFO_0128	20191203_66_E5	Tue Dec 24 12:47:30 EST 2019	Sample#2749406750451957858	m	40	40x	Gen1 MCFO (40x)	NA
R12B10	attP2	57C10PEST_attp18_4stop1	20151223_21_F1	Thu Jan 21 10:34:59 EST 2016	Sample#2230071590442238050	f		20x, 63x	Annotator Gen1 MCFO	Jens Goldammer
R12B10	attP2	57C10PEST_attp18_4stop1	20151223_21_F2	Thu Jan 21 10:35:18 EST 2016	Sample#2230071668938637410	f		20x, 63x	Annotator Gen1 MCFO	Jens Goldammer
R12B10	attP2	57C10PEST_attp18_4stop1	20151223_21_F3	Thu Jan 21 10:35:39 EST 2016	Sample#2230071755341299810	f		20x, 63x	Annotator Gen1 MCFO	Jens Goldammer
R12C02	attP2	57C10PEST_brp_SNAP_MCFO_X23_0099	20181121_64_A1	Thu Dec 20 15:36:13 EST 2018	Sample#2615728084397064290	f		40x	Gen1 MCFO (40x)	NA
R12C02	attP2	57C10PEST_brp_SNAP_MCFO_X23_0099	20181121_64_A2	Thu Dec 20 15:36:13 EST 2018	Sample#2615728085504360546	f		40x	Gen1 MCFO (40x)	NA
R12C03	attP2	57C10PEST_brp_SNAP_MCFO_X23_0099	20181106_63_A1	Fri Nov 30 14:25:45 EST 2018	Sample#2608462593530003554	f		40x	Gen1 MCFO (40x)	NA
R12C03	attP2	57C10PEST_brp_SNAP_MCFO_X23_0099	20181106_63_A2	Fri Nov 30 14:25:45 EST 2018	Sample#2608462594138177634	f		40x	Gen1 MCFO (40x)	NA
R12C03	attP2	57C10PEST_brp_SNAP_MCFO_X23_0099	20181106_63_A3	Fri Nov 30 14:25:45 EST 2018	Sample#2608462594712797282	f		40x	Gen1 MCFO (40x)	NA
R12C03	attP2	57C10PEST_brp_SNAP_MCFO_X23_0099	20181106_63_A4	Fri Nov 30 14:25:45 EST 2018	Sample#2608462595279028322	f		40x	Gen1 MCFO (40x)	NA
R12C03	attP2	57C10PEST_brp_SNAP_MCFO_X23_0099	20181106_63_A5	Fri Nov 30 14:25:45 EST 2018	Sample#2608462595857842274	f		40x	Gen1 MCFO (40x)	NA
R12C03	attP2	57C10PEST_brp_SNAP_MCFO_X23_0099	20181106_63_A6	Fri Nov 30 14:25:45 EST 2018	Sample#2608462596436656226	f		40x	Gen1 MCFO (40x)	NA
R12C04	attP2	57C10wt_attp8_3stop1	20130610_3_G5	Thu Mar 13 18:06:13 EDT 2014	Sample#1984108686989066338	f		20x	Annotator Gen1 MCFO	Tanya Wolff
R12C04	attP2	57C10wt_attp8_3stop1	20130610_3_G6	Thu Mar 13 18:06:14 EDT 2014	Sample#1984108687584657506	f		20x	Annotator Gen1 MCFO	Tanya Wolff
R12C04	attP2	57C10wt_attp8_3stop1	20130610_3_H1	Thu Mar 13 18:06:14 EDT 2014	Sample#1984108687987310690	f		20x	Annotator Gen1 MCFO	Tanya Wolff
R12C04	attP2	57C10wt_attp8_3stop1	20130610_3_H2	Thu Mar 13 18:06:14 EDT 2014	Sample#1984108688918446178	f		20x	Annotator Gen1 MCFO	Tanya Wolff
R12C04	attP2	57C10wt_attp8_3stop1	20130610_3_H3	Thu Mar 13 18:06:14 EDT 2014	Sample#1984108690055102562	f		20x	Annotator Gen1 MCFO	Tanya Wolff
R12C04	attP2	57C10wt_attp8_3stop1	20130610_3_H4	Thu Mar 13 18:06:14 EDT 2014	Sample#1984108690600362082	f		20x	Annotator Gen1 MCFO	Tanya Wolff
R12C04	attP2	57C10wt_attp8_3stop1	20130610_3_H5	Thu Mar 13 18:06:14 EDT 2014	Sample#1984108691128844386	f		20x	Annotator Gen1 MCFO	Tanya Wolff
R12C04	attP2	57C10wt_attp8_3stop1	20130610_3_H6	Thu Mar 13 18:06:15 EDT 2014	Sample#1984108692429078626	f		20x	Annotator Gen1 MCFO	Tanya Wolff
R12C04	attP2	57C10wt_attp8_3stop1	20130610_3_I1	Thu Mar 13 18:06:15 EDT 2014	Sample#1984108693314076770	f		20x	Annotator Gen1 MCFO	Tanya Wolff
R12C04	attP2	57C10PEST_brp_SNAP_MCFO_X23_0099	20181121_63_B1	Mon Dec 17 15:08:52 EST 2018	Sample#2614634038295527522	f		40x	Gen1 MCFO (40x)	NA
R12C04	attP2	57C10PEST_brp_SNAP_MCFO_X23_0099	20181121_63_B2	Mon Dec 17 15:08:52 EST 2018	Sample#2614634038844981346	f		40x	Gen1 MCFO (40x)	NA
R12C04	attP2	57C10PEST_brp_SNAP_MCFO_X23_0099	20181121_63_B3	Mon Dec 17 15:08:52 EST 2018	Sample#2614634039394435170	f		40x	Gen1 MCFO (40x)	NA
R12C04	attP2	57C10PEST_brp_SNAP_MCFO_X23_0099	20181121_63_B4	Mon Dec 17 15:08:52 EST 2018	Sample#2614634039939694690	f		40x	Gen1 MCFO (40x)	NA
R12C04	attP2	57C10PEST_brp_SNAP_MCFO_X23_0099	20181121_63_B5	Mon Dec 17 15:08:52 EST 2018	Sample#2614634040489148514	f		40x	Gen1 MCFO (40x)	NA
R12C04	attP2	57C10PEST_brp_SNAP_MCFO_X23_0099	20181121_63_B6	Mon Dec 17 15:08:52 EST 2018	Sample#2614634041063768162	f		40x	Gen1 MCFO (40x)	NA
R12C04	attP2	pBPhsFlp2_PEST_brp_SNAP_MCFO_0128	20191011_63_H1	Tue Oct 29 18:29:59 EDT 2019	Sample#2729184119111024738	m	13	40x	Gen1 MCFO (40x)	NA
R12C04	attP2	pBPhsFlp2_PEST_brp_SNAP_MCFO_0128	20191011_63_H10	Tue Oct 29 18:30:01 EDT 2019	Sample#2729184126811766882	m	13	40x	Gen1 MCFO (40x)	NA
R12C04	attP2	pBPhsFlp2_PEST_brp_SNAP_MCFO_0128	20191011_63_H2	Tue Oct 29 18:29:59 EDT 2019	Sample#2729184119987634274	m	13	40x	Gen1 MCFO (40x)	NA
R12C04	attP2	pBPhsFlp2_PEST_brp_SNAP_MCFO_0128	20191011_63_H3	Tue Oct 29 18:30:00 EDT 2019	Sample#2729184120893603938	m	13	40x	Gen1 MCFO (40x)	NA
R12C04	attP2	pBPhsFlp2_PEST_brp_SNAP_MCFO_0128	20191011_63_H4	Tue Oct 29 18:30:00 EDT 2019	Sample#2729184121782796386	m	13	40x	Gen1 MCFO (40x)	NA
R12C04	attP2	pBPhsFlp2_PEST_brp_SNAP_MCFO_0128	20191011_63_H5	Tue Oct 29 18:30:00 EDT 2019	Sample#2729184122613268578	m	13	40x	Gen1 MCFO (40x)	NA
R12C04	attP2	pBPhsFlp2_PEST_brp_SNAP_MCFO_0128	20191011_63_H6	Tue Oct 29 18:30:00 EDT 2019	Sample#2729184123447935074	m	13	40x	Gen1 MCFO (40x)	NA
R12C04	attP2	pBPhsFlp2_PEST_brp_SNAP_MCFO_0128	20191011_63_H7	Tue Oct 29 18:30:01 EDT 2019	Sample#2729184124299378786	m	13	40x	Gen1 MCFO (40x)	NA
R12C04	attP2	pBPhsFlp2_PEST_brp_SNAP_MCFO_0128	20191011_63_H8	Tue Oct 29 18:30:01 EDT 2019	Sample#2729184125142433890	m	13	40x	Gen1 MCFO (40x)	NA
R12C04	attP2	pBPhsFlp2_PEST_brp_SNAP_MCFO_0128	20191011_63_H9	Tue Oct 29 18:30:01 EDT 2019	Sample#2729184125977100386	m	13	40x	Gen1 MCFO (40x)	NA
R12C07	attP2	57C10PEST_attp8_3stop1	20161021_20_E2	Fri Nov 04 09:08:43 EDT 2016	Sample#2334402483662618698	f		20x, 63x	Annotator Gen1 MCFO	Gabriella Sterne
R12C07	attP2	57C10PEST_attp8_3stop1	20161021_20_E3	Fri Nov 04 09:08:43 EDT 2016	Sample#2334402484551811146	f		20x	Annotator Gen1 MCFO	Gabriella Sterne
R12C07	attP2	57C10PEST_attp8_3stop1	20161021_20_E4	Fri Nov 04 09:08:43 EDT 2016	Sample#2334402485327757386	f		20x, 63x	Annotator Gen1 MCFO	Gabriella Sterne
R12C07	attP2	57C10PEST_attp8_3stop1	20161021_20_E5	Fri Nov 04 09:08:43 EDT 2016	Sample#2334402486296641610	f		20x, 63x	Annotator Gen1 MCFO	Gabriella Sterne
R12C07	attP2	57C10PEST_attp8_3stop1	20161021_20_E6	Fri Nov 04 09:08:44 EDT 2016	Sample#2334402487101947978	f		20x	Annotator Gen1 MCFO	Gabriella Sterne
R12C07	attP2	57C10PEST_attp8_3stop1	20161021_20_E7	Fri Nov 04 09:08:44 EDT 2016	Sample#2334402487894671434	f		20x, 63x	Annotator Gen1 MCFO	Gabriella Sterne
R12C07	attP2	57C10PEST_attp8_3stop1	20161021_20_E8	Fri Nov 04 09:08:44 EDT 2016	Sample#2334402488863555658	f		20x, 63x	Annotator Gen1 MCFO	Gabriella Sterne
R12C07	attP2	57C10PEST_brp_SNAP_MCFO_X23_0099	20180831_61_D1	Wed Sep 19 13:57:30 EDT 2018	Sample#2582348458237100130	f		40x	Gen1 MCFO (40x)	NA
R12C07	attP2	57C10PEST_brp_SNAP_MCFO_X23_0099	20180831_61_D2	Wed Sep 19 13:57:30 EDT 2018	Sample#2582348458560061538	f		40x	Gen1 MCFO (40x)	NA
R12C07	attP2	57C10PEST_brp_SNAP_MCFO_X23_0099	20180831_61_D3	Wed Sep 19 13:57:30 EDT 2018	Sample#2582348458891411554	f		40x	Gen1 MCFO (40x)	NA
R12C07	attP2	57C10PEST_brp_SNAP_MCFO_X23_0099	20180831_61_D4	Wed Sep 19 13:57:30 EDT 2018	Sample#2582348459214372962	f		40x	Gen1 MCFO (40x)	NA
R12C07	attP2	57C10PEST_brp_SNAP_MCFO_X23_0099	20180831_61_D5	Wed Sep 19 13:57:30 EDT 2018	Sample#2582348459533140066	f		40x	Gen1 MCFO (40x)	NA
R12C07	attP2	57C10PEST_brp_SNAP_MCFO_X23_0099	20180831_61_D6	Wed Sep 19 13:57:30 EDT 2018	Sample#2582348459851907170	f		40x	Gen1 MCFO (40x)	NA
R12C07	attP2	57C10PEST_brp_SNAP_MCFO_X23_0099	20180831_61_E1	Wed Sep 19 13:57:30 EDT 2018	Sample#2582348460174868578	f		40x	Gen1 MCFO (40x)	NA
R12C11	attP2	57C10L_brp_SNAP_MCFO_X23_0117	20190531_64_J2	Tue Jun 11 14:16:06 EDT 2019	Sample#2678385924542300258	f		40x	Gen1 MCFO (40x)	NA
R12C11	attP2	57C10L_brp_SNAP_MCFO_X23_0117	20190531_64_J3	Tue Jun 11 14:16:06 EDT 2019	Sample#2678385924991090786	f		40x	Gen1 MCFO (40x)	NA
R12C11	attP2	57C10L_brp_SNAP_MCFO_X23_0117	20190531_64_J4	Tue Jun 11 14:16:06 EDT 2019	Sample#2678385925435687010	f		40x	Gen1 MCFO (40x)	NA
R12C11	attP2	57C10L_brp_SNAP_MCFO_X23_0117	20190531_64_J5	Tue Jun 11 14:16:06 EDT 2019	Sample#2678385925880283234	f		40x	Gen1 MCFO (40x)	NA
R12C11	attP2	57C10PEST_brp_SNAP_MCFO_X23_0099	20190115_66_A3	Wed Jan 23 12:41:02 EST 2019	Sample#2628005185787527266	f		40x	Gen1 MCFO (40x)	NA
R12C11	attP2	57C10PEST_brp_SNAP_MCFO_X23_0099	20190115_66_A4	Wed Jan 23 12:41:02 EST 2019	Sample#2628005186404089954	f		40x	Gen1 MCFO (40x)	NA
R12C11	attP2	57C10PEST_brp_SNAP_MCFO_X23_0099	20190115_66_A6	Wed Jan 23 12:41:02 EST 2019	Sample#2628005186995486818	f		40x	Gen1 MCFO (40x)	NA
R12D02	attP2	57C10PEST_brp_SNAP_MCFO_X23_0099	20181121_64_B1	Thu Dec 20 15:36:13 EST 2018	Sample#2615728086607462498	f		40x	Gen1 MCFO (40x)	NA
R12D02	attP2	57C10PEST_brp_SNAP_MCFO_X23_0099	20181121_64_B2	Thu Dec 20 15:36:13 EST 2018	Sample#2615728087697981538	f		40x	Gen1 MCFO (40x)	NA
R12D02	attP2	57C10PEST_brp_SNAP_MCFO_X23_0099	20181121_64_B3	Thu Dec 20 15:36:14 EST 2018	Sample#2615728089732218978	f		40x	Gen1 MCFO (40x)	NA
R12D02	attP2	57C10PEST_brp_SNAP_MCFO_X23_0099	20181121_64_B4	Thu Dec 20 15:36:14 EST 2018	Sample#2615728090860486754	f		40x	Gen1 MCFO (40x)	NA
R12D02	attP2	57C10PEST_brp_SNAP_MCFO_X23_0099	20181121_64_B5	Thu Dec 20 15:36:15 EST 2018	Sample#2615728092206858338	f		40x	Gen1 MCFO (40x)	NA
R12D02	attP2	57C10PEST_brp_SNAP_MCFO_X23_0099	20181121_64_B6	Thu Dec 20 15:36:12 EST 2018	Sample#2615728083281379426	f		40x	Gen1 MCFO (40x)	NA
R12D02	attP2	pBPhsFlp2_PEST_brp_SNAP_MCFO_0128	20191011_63_I1	Tue Oct 29 18:30:01 EDT 2019	Sample#2729184127646433378	m	13	40x	Gen1 MCFO (40x)	NA
R12D02	attP2	pBPhsFlp2_PEST_brp_SNAP_MCFO_0128	20191011_63_I10	Tue Oct 29 18:30:03 EDT 2019	Sample#2729184135355564130	m	13	40x	Gen1 MCFO (40x)	NA
R12D02	attP2	pBPhsFlp2_PEST_brp_SNAP_MCFO_0128	20191011_63_I2	Tue Oct 29 18:30:02 EDT 2019	Sample#2729184128556597346	m	13	40x	Gen1 MCFO (40x)	NA
R12D02	attP2	pBPhsFlp2_PEST_brp_SNAP_MCFO_0128	20191011_63_I3	Tue Oct 29 18:30:02 EDT 2019	Sample#2729184129449984098	m	13	40x	Gen1 MCFO (40x)	NA
R12D02	attP2	pBPhsFlp2_PEST_brp_SNAP_MCFO_0128	20191011_63_I4	Tue Oct 29 18:30:02 EDT 2019	Sample#2729184130355953762	m	13	40x	Gen1 MCFO (40x)	NA
R12D02	attP2	pBPhsFlp2_PEST_brp_SNAP_MCFO_0128	20191011_63_I5	Tue Oct 29 18:30:02 EDT 2019	Sample#2729184131190620258	m	13	40x	Gen1 MCFO (40x)	NA
R12D02	attP2	pBPhsFlp2_PEST_brp_SNAP_MCFO_0128	20191011_63_I6	Tue Oct 29 18:30:02 EDT 2019	Sample#2729184132025286754	m	13	40x	Gen1 MCFO (40x)	NA
R12D02	attP2	pBPhsFlp2_PEST_brp_SNAP_MCFO_0128	20191011_63_I7	Tue Oct 29 18:30:03 EDT 2019	Sample#2729184132859953250	m	13	40x	Gen1 MCFO (40x)	NA
R12D02	attP2	pBPhsFlp2_PEST_brp_SNAP_MCFO_0128	20191011_63_I8	Tue Oct 29 18:30:03 EDT 2019	Sample#2729184133690425442	m	13	40x	Gen1 MCFO (40x)	NA
R12D02	attP2	pBPhsFlp2_PEST_brp_SNAP_MCFO_0128	20191011_63_I9	Tue Oct 29 18:30:03 EDT 2019	Sample#2729184134525091938	m	13	40x	Gen1 MCFO (40x)	NA
R12D04	attP2	57C10PEST_attp18_4stop1	20161123_20_G1	Wed Nov 30 12:35:44 EST 2016	Sample#2343891765666250897	f		20x, 63x	Annotator Gen1 MCFO	Masayoshi Ito
R12D04	attP2	57C10PEST_attp18_4stop1	20161123_20_G2	Wed Nov 30 12:35:44 EST 2016	Sample#2343891765913714833	f		20x, 63x	Annotator Gen1 MCFO	Masayoshi Ito
R12D04	attP2	57C10PEST_attp18_4stop1	20161123_20_G3	Wed Nov 30 12:35:44 EST 2016	Sample#2343891766123430033	f		20x	Annotator Gen1 MCFO	Masayoshi Ito
R12D04	attP2	57C10PEST_attp18_4stop1	20161123_20_G4	Wed Nov 30 12:35:44 EST 2016	Sample#2343891766328950929	f		20x	Annotator Gen1 MCFO	Masayoshi Ito
R12D04	attP2	57C10PEST_attp18_4stop1	20161123_20_G5	Wed Nov 30 12:35:44 EST 2016	Sample#2343891766534471825	f		20x	Annotator Gen1 MCFO	Masayoshi Ito
R12D04	attP2	57C10PEST_attp18_4stop1	20161123_20_G6	Wed Nov 30 12:35:44 EST 2016	Sample#2343891766739992721	f		20x, 63x	Annotator Gen1 MCFO	Masayoshi Ito
R12D04	attP2	57C10PEST_attp18_4stop1	20161123_20_G7	Wed Nov 30 12:35:44 EST 2016	Sample#2343891767000039569	f		20x	Annotator Gen1 MCFO	Masayoshi Ito
R12D04	attP2	57C10PEST_attp18_4stop1	20161123_20_G8	Wed Nov 30 12:35:44 EST 2016	Sample#2343891767205560465	f		20x, 63x	Annotator Gen1 MCFO	Masayoshi Ito
R12D05	attP2	57C10PEST_attp18_4stop1	20160519_19_G1	Fri Jun 24 21:22:35 EDT 2016	Sample#2286389581861355594	f		20x, 63x	Annotator Gen1 MCFO	Masayoshi Ito
R12D05	attP2	57C10PEST_attp18_4stop1	20160519_19_G2	Fri Jun 24 21:22:37 EDT 2016	Sample#2286389588450607178	f		20x, 63x	Annotator Gen1 MCFO	Masayoshi Ito
R12D05	attP2	57C10PEST_attp18_4stop1	20160519_19_G3	Fri Jun 24 21:22:41 EDT 2016	Sample#2286389603365552202	f		20x, 63x	Annotator Gen1 MCFO	Masayoshi Ito
R12D05	attP2	57C10PEST_attp18_4stop1	20160519_19_G4	Wed May 25 16:58:11 EDT 2016	Sample#2275451405114277986	f		20x	Annotator Gen1 MCFO	Masayoshi Ito
R12D05	attP2	57C10PEST_attp18_4stop1	20160519_19_G5	Wed May 25 16:58:11 EDT 2016	Sample#2275451405705674850	f		20x	Annotator Gen1 MCFO	Masayoshi Ito
R12D05	attP2	57C10PEST_attp18_4stop1	20160519_19_G6	Fri Jun 24 21:22:43 EDT 2016	Sample#2286389614325268554	f		20x, 63x	Annotator Gen1 MCFO	Masayoshi Ito
R12D05	attP2	57C10PEST_attp18_4stop1	20160519_19_G7	Wed May 25 16:58:11 EDT 2016	Sample#2275451406896857186	f		20x	Annotator Gen1 MCFO	Masayoshi Ito
R12D05	attP2	57C10PEST_attp18_4stop1	20160519_19_G8	Fri Jun 24 21:22:45 EDT 2016	Sample#2286389623439491146	f		20x, 63x	Annotator Gen1 MCFO	Masayoshi Ito
R12D07	attP2	57C10PEST_brp_SNAP_MCFO_X23_0099	20181121_63_C1	Mon Dec 17 15:08:53 EST 2018	Sample#2614634041650970722	f		40x	Gen1 MCFO (40x)	NA
R12D07	attP2	57C10PEST_brp_SNAP_MCFO_X23_0099	20181121_63_C2	Mon Dec 17 15:08:53 EST 2018	Sample#2614634042229784674	f		40x	Gen1 MCFO (40x)	NA
R12D07	attP2	57C10PEST_brp_SNAP_MCFO_X23_0099	20181121_63_C3	Mon Dec 17 15:08:53 EST 2018	Sample#2614634042800210018	f		40x	Gen1 MCFO (40x)	NA
R12D07	attP2	57C10PEST_brp_SNAP_MCFO_X23_0099	20181121_63_C4	Mon Dec 17 15:08:53 EST 2018	Sample#2614634043353858146	f		40x	Gen1 MCFO (40x)	NA
R12D07	attP2	57C10PEST_brp_SNAP_MCFO_X23_0099	20181121_63_C5	Mon Dec 17 15:08:53 EST 2018	Sample#2614634043903311970	f		40x	Gen1 MCFO (40x)	NA
R12D07	attP2	57C10PEST_brp_SNAP_MCFO_X23_0099	20181121_63_C6	Mon Dec 17 15:08:53 EST 2018	Sample#2614634044452765794	f		40x	Gen1 MCFO (40x)	NA
R12D08	attP2	57C10PEST_brp_SNAP_MCFO_X23_0099	20181221_63_E1	Tue Jan 22 15:27:04 EST 2019	Sample#2627684583671332962	f		40x	Gen1 MCFO (40x)	NA
R12D08	attP2	57C10PEST_brp_SNAP_MCFO_X23_0099	20181221_63_E2	Tue Jan 22 15:27:04 EST 2019	Sample#2627684584279507042	f		40x	Gen1 MCFO (40x)	NA
R12D08	attP2	57C10PEST_brp_SNAP_MCFO_X23_0099	20181221_63_E3	Wed Jan 23 16:22:00 EST 2019	Sample#2628060792867520610	f		40x	Gen1 MCFO (40x)	NA
R12D08	attP2	57C10PEST_brp_SNAP_MCFO_X23_0099	20181221_63_E4	Wed Jan 23 16:22:00 EST 2019	Sample#2628060793588940898	f		40x	Gen1 MCFO (40x)	NA
R12D09	attP2	57C10PEST_attp8_3stop1	20161222_28_F1	Fri Dec 30 13:07:35 EST 2016	Sample#2354771417033080930	f		20x, 63x	Annotator Gen1 MCFO	Gabriella Sterne
R12D09	attP2	57C10PEST_attp8_3stop1	20161222_28_F2	Fri Dec 30 13:07:35 EST 2016	Sample#2354771417175687266	f		20x, 63x	Annotator Gen1 MCFO	Gabriella Sterne
R12D09	attP2	57C10PEST_attp8_3stop1	20161222_28_F3	Fri Dec 30 13:07:35 EST 2016	Sample#2354771417314099298	f		20x, 63x	Annotator Gen1 MCFO	Gabriella Sterne
R12D09	attP2	57C10PEST_attp8_3stop1	20170217_22_A1	Tue Feb 28 12:40:14 EST 2017	Sample#2376507805919084642	f		20x, 63x	Annotator Gen1 MCFO	Gabriella Sterne
R12D09	attP2	57C10PEST_attp8_3stop1	20170217_22_A2	Tue Feb 28 12:40:14 EST 2017	Sample#2376507806082662498	f		20x, 63x	Annotator Gen1 MCFO	Gabriella Sterne
R12D09	attP2	57C10PEST_attp8_3stop1	20170217_22_A3	Tue Feb 28 12:40:14 EST 2017	Sample#2376507806237851746	f		20x, 63x	Annotator Gen1 MCFO	Gabriella Sterne
R12D09	attP2	57C10PEST_attp8_3stop1	20170217_22_A4	Tue Feb 28 12:40:14 EST 2017	Sample#2376507806397235298	f		20x, 63x	Annotator Gen1 MCFO	Gabriella Sterne
R12D09	attP2	57C10PEST_attp8_3stop1	20170217_22_A5	Tue Feb 28 12:40:14 EST 2017	Sample#2376507806548230242	f		20x, 63x	Annotator Gen1 MCFO	Gabriella Sterne
R12D09	attP2	57C10PEST_attp8_3stop1	20170217_22_A6	Tue Feb 28 12:40:14 EST 2017	Sample#2376507806707613794	f		20x	Annotator Gen1 MCFO	Gabriella Sterne
R12D09	attP2	57C10PEST_brp_SNAP_MCFO_X23_0099	20180831_61_F1	Wed Sep 19 13:57:30 EDT 2018	Sample#2582348460476858466	f		40x	Gen1 MCFO (40x)	NA
R12D09	attP2	57C10PEST_brp_SNAP_MCFO_X23_0099	20180831_61_F2	Wed Sep 19 13:57:30 EDT 2018	Sample#2582348461072449634	f		40x	Gen1 MCFO (40x)	NA
R12D09	attP2	57C10PEST_brp_SNAP_MCFO_X23_0099	20180831_61_F3	Wed Sep 19 13:57:30 EDT 2018	Sample#2582348461370245218	f		40x	Gen1 MCFO (40x)	NA
R12D09	attP2	57C10PEST_brp_SNAP_MCFO_X23_0099	20180831_61_F4	Wed Sep 19 13:57:30 EDT 2018	Sample#2582348461668040802	f		40x	Gen1 MCFO (40x)	NA
R12D09	attP2	57C10PEST_brp_SNAP_MCFO_X23_0099	20180831_61_F5	Wed Sep 19 13:57:31 EDT 2018	Sample#2582348461965836386	f		40x	Gen1 MCFO (40x)	NA
R12D09	attP2	57C10PEST_brp_SNAP_MCFO_X23_0099	20180831_61_F6	Wed Sep 19 13:57:31 EDT 2018	Sample#2582348462259437666	f		40x	Gen1 MCFO (40x)	NA
R12D09	attP2	pBPhsFlp2_PEST_brp_SNAP_MCFO_0128	20191203_66_F1	Tue Dec 24 12:47:31 EST 2019	Sample#2749406751479562338	m	40	40x	Gen1 MCFO (40x)	NA
R12D09	attP2	pBPhsFlp2_PEST_brp_SNAP_MCFO_0128	20191203_66_F2	Tue Dec 24 12:47:31 EST 2019	Sample#2749406752561692770	m	40	40x	Gen1 MCFO (40x)	NA
R12D09	attP2	pBPhsFlp2_PEST_brp_SNAP_MCFO_0128	20191203_66_F3	Tue Dec 24 12:47:31 EST 2019	Sample#2749406753660600418	m	40	40x	Gen1 MCFO (40x)	NA
R12D09	attP2	pBPhsFlp2_PEST_brp_SNAP_MCFO_0128	20191203_66_F4	Tue Dec 24 12:47:31 EST 2019	Sample#2749406754696593506	m	40	40x	Gen1 MCFO (40x)	NA
R12D09	attP2	pBPhsFlp2_PEST_brp_SNAP_MCFO_0128	20191203_66_F5	Tue Dec 24 12:47:32 EST 2019	Sample#2749406755732586594	m	40	40x	Gen1 MCFO (40x)	NA
R12D09	attP2	pBPhsFlp2_PEST_brp_SNAP_MCFO_0128	20191203_66_F6	Tue Dec 24 12:47:32 EST 2019	Sample#2749406756764385378	m	40	40x	Gen1 MCFO (40x)	NA
R12D11	attP2	57C10PEST_brp_SNAP_MCFO_X23_0099	20180831_61_G1	Wed Sep 19 13:57:31 EDT 2018	Sample#2582348462553038946	f		40x	Gen1 MCFO (40x)	NA
R12D11	attP2	57C10PEST_brp_SNAP_MCFO_X23_0099	20180831_61_G2	Wed Sep 19 13:57:33 EDT 2018	Sample#2582348472141217890	f		40x	Gen1 MCFO (40x)	NA
R12D11	attP2	57C10PEST_brp_SNAP_MCFO_X23_0099	20180831_61_G3	Wed Sep 19 13:57:33 EDT 2018	Sample#2582348472472567906	f		40x	Gen1 MCFO (40x)	NA
R12D11	attP2	57C10PEST_brp_SNAP_MCFO_X23_0099	20180831_61_G4	Wed Sep 19 13:57:33 EDT 2018	Sample#2582348472782946402	f		40x	Gen1 MCFO (40x)	NA
R12D11	attP2	57C10PEST_brp_SNAP_MCFO_X23_0099	20180831_61_G5	Wed Sep 19 13:57:33 EDT 2018	Sample#2582348473084936290	f		40x	Gen1 MCFO (40x)	NA
R12D11	attP2	57C10PEST_brp_SNAP_MCFO_X23_0099	20180831_61_G6	Wed Sep 19 13:57:33 EDT 2018	Sample#2582348473395314786	f		40x	Gen1 MCFO (40x)	NA
R12D11	attP2	pBPhsFlp2_PEST_brp_SNAP_MCFO_0128	20191203_66_G1	Tue Dec 24 12:47:32 EST 2019	Sample#2749406757796184162	m	40	40x	Gen1 MCFO (40x)	NA
R12D11	attP2	pBPhsFlp2_PEST_brp_SNAP_MCFO_0128	20191203_66_G2	Tue Dec 24 12:47:32 EST 2019	Sample#2749406758890897506	m	40	40x	Gen1 MCFO (40x)	NA
R12D11	attP2	pBPhsFlp2_PEST_brp_SNAP_MCFO_0128	20191203_66_G3	Tue Dec 24 12:47:33 EST 2019	Sample#2749406759989805154	m	40	40x	Gen1 MCFO (40x)	NA
R12D11	attP2	pBPhsFlp2_PEST_brp_SNAP_MCFO_0128	20191203_66_G4	Tue Dec 24 12:47:33 EST 2019	Sample#2749406761101295714	m	40	40x	Gen1 MCFO (40x)	NA
R12D11	attP2	pBPhsFlp2_PEST_brp_SNAP_MCFO_0128	20191203_66_G5	Tue Dec 24 12:47:33 EST 2019	Sample#2749406762128900194	m	40	40x	Gen1 MCFO (40x)	NA
R12D11	attP2	pBPhsFlp2_PEST_brp_SNAP_MCFO_0128	20191203_66_G6	Tue Dec 24 12:47:33 EST 2019	Sample#2749406763164893282	m	40	40x	Gen1 MCFO (40x)	NA
R12D11	attP2	pBPhsFlp2_PEST_brp_SNAP_MCFO_0128	20191203_66_G7	Tue Dec 24 12:47:34 EST 2019	Sample#2749406764192497762	m	40	40x	Gen1 MCFO (40x)	NA
R12D12	attP2	57C10PEST_attp8_3stop1	20130520_2_D2	Sat Feb 22 05:55:11 EST 2014	Sample#1977054443945852935	f		20x	Annotator Gen1 MCFO	Tanya Wolff
R12D12	attP2	57C10PEST_attp8_3stop1	20130520_2_D3	Sat Feb 22 05:55:11 EST 2014	Sample#1977054444524666887	f		20x	Annotator Gen1 MCFO	Tanya Wolff
R12D12	attP2	57C10PEST_attp8_3stop1	20130520_2_D5	Sat Feb 22 05:55:11 EST 2014	Sample#1977054445099286535	f		20x	Annotator Gen1 MCFO	Tanya Wolff
R12D12	attP2	57C10PEST_attp8_3stop1	20130520_2_E1	Sat Feb 22 05:55:11 EST 2014	Sample#1977054446571487239	f		20x	Annotator Gen1 MCFO	Tanya Wolff
R12D12	attP2	57C10PEST_attp8_3stop1	20130520_2_E2	Sat Feb 22 05:55:12 EST 2014	Sample#1977054447171272711	f		20x	Annotator Gen1 MCFO	Tanya Wolff
R12D12	attP2	57C10wt_attp8_3stop1	20130606_3_B6	Thu Apr 24 20:10:05 EDT 2014	Sample#1999360149080244322	f		20x	Annotator Gen1 MCFO	Tanya Wolff
R12D12	attP2	57C10wt_attp8_3stop1	20130606_3_C1	Thu Apr 24 20:10:06 EDT 2014	Sample#1999360149801664610	f		20x	Annotator Gen1 MCFO	Tanya Wolff
R12D12	attP2	57C10wt_attp8_3stop1	20130606_3_C2	Thu Apr 24 20:10:06 EDT 2014	Sample#1999360150548250722	f		20x	Annotator Gen1 MCFO	Tanya Wolff
R12D12	attP2	57C10wt_attp8_3stop1	20130606_3_C3	Thu Apr 24 20:10:06 EDT 2014	Sample#1999360151219339362	f		20x	Annotator Gen1 MCFO	Tanya Wolff
R12D12	attP2	57C10wt_attp8_3stop1	20130606_3_C4	Thu Apr 24 20:10:06 EDT 2014	Sample#1999360152058200162	f		20x	Annotator Gen1 MCFO	Tanya Wolff
R12D12	attP2	57C10wt_attp8_3stop1	20130606_3_C5	Thu Apr 24 20:10:06 EDT 2014	Sample#1999360152821563490	f		20x	Annotator Gen1 MCFO	Tanya Wolff
R12D12	attP2	57C10wt_attp8_3stop1	20130606_3_C6	Thu Apr 24 20:10:06 EDT 2014	Sample#1999360153459097698	f		20x	Annotator Gen1 MCFO	Tanya Wolff
R12D12	attP2	57C10wt_attp8_3stop1	20130606_3_D1	Thu Apr 24 20:10:07 EDT 2014	Sample#1999360154482507874	f		20x	Annotator Gen1 MCFO	Tanya Wolff
R12D12	attP2	57C10wt_attp8_3stop1	20130606_3_D2	Thu Apr 24 20:10:07 EDT 2014	Sample#1999360155149402210	f		20x	Annotator Gen1 MCFO	Tanya Wolff
R12D12	attP2	57C10wt_attp8_3stop1	20130612_2_A1	Thu Apr 24 20:10:27 EDT 2014	Sample#1999360241149411426	f		20x	Annotator Gen1 MCFO	Tanya Wolff
R12D12	attP2	57C10wt_attp8_3stop1	20130612_2_A2	Thu Apr 24 20:10:28 EDT 2014	Sample#1999360242252513378	f		20x	Annotator Gen1 MCFO	Tanya Wolff
R12D12	attP2	57C10wt_attp8_3stop1	20130612_2_A3	Thu Apr 24 20:10:28 EDT 2014	Sample#1999360243141705826	f		20x	Annotator Gen1 MCFO	Tanya Wolff
R12D12	attP2	57C10wt_attp8_3stop1	20130612_2_A4	Thu Apr 24 20:10:28 EDT 2014	Sample#1999360244060258402	f		20x	Annotator Gen1 MCFO	Tanya Wolff
R12D12	attP2	57C10wt_attp8_3stop1	20130612_2_A6	Thu Apr 24 20:10:28 EDT 2014	Sample#1999360245998026850	f		20x	Annotator Gen1 MCFO	Tanya Wolff
R12D12	attP2	57C10wt_attp8_3stop1	20130612_2_B1	Thu Apr 24 20:10:29 EDT 2014	Sample#1999360246996271202	f		20x	Annotator Gen1 MCFO	Tanya Wolff
R12D12	attP2	57C10wt_attp8_3stop1	20130612_2_B3	Thu Apr 24 20:10:29 EDT 2014	Sample#1999360248556552290	f		20x	Annotator Gen1 MCFO	Tanya Wolff
R12D12	attP2	57C10PEST_brp_SNAP_MCFO_X23_0099	20180831_61_H1	Wed Sep 19 13:57:33 EDT 2018	Sample#2582348473693110370	f		40x	Gen1 MCFO (40x)	NA
R12D12	attP2	57C10PEST_brp_SNAP_MCFO_X23_0099	20180831_61_H2	Wed Sep 19 13:57:33 EDT 2018	Sample#2582348473995100258	f		40x	Gen1 MCFO (40x)	NA
R12D12	attP2	57C10PEST_brp_SNAP_MCFO_X23_0099	20180831_61_H3	Wed Sep 19 13:57:33 EDT 2018	Sample#2582348474292895842	f		40x	Gen1 MCFO (40x)	NA
R12D12	attP2	57C10PEST_brp_SNAP_MCFO_X23_0099	20180831_61_H4	Wed Sep 19 13:57:34 EDT 2018	Sample#2582348474590691426	f		40x	Gen1 MCFO (40x)	NA
R12D12	attP2	57C10PEST_brp_SNAP_MCFO_X23_0099	20180831_61_H5	Wed Sep 19 13:57:34 EDT 2018	Sample#2582348474884292706	f		40x	Gen1 MCFO (40x)	NA
R12D12	attP2	57C10PEST_brp_SNAP_MCFO_X23_0099	20180831_61_H6	Wed Sep 19 13:57:34 EDT 2018	Sample#2582348475173699682	f		40x	Gen1 MCFO (40x)	NA
R12D12	attP2	pBPhsFlp2_PEST_brp_SNAP_MCFO_0128	20191203_66_H1	Tue Dec 24 12:47:34 EST 2019	Sample#2749406765228490850	m	40	40x	Gen1 MCFO (40x)	NA
R12D12	attP2	pBPhsFlp2_PEST_brp_SNAP_MCFO_0128	20191203_66_H2	Tue Dec 24 12:47:34 EST 2019	Sample#2749406766331592802	m	40	40x	Gen1 MCFO (40x)	NA
R12D12	attP2	pBPhsFlp2_PEST_brp_SNAP_MCFO_0128	20191203_66_H3	Tue Dec 24 12:47:34 EST 2019	Sample#2749406767447277666	m	40	40x	Gen1 MCFO (40x)	NA
R12D12	attP2	pBPhsFlp2_PEST_brp_SNAP_MCFO_0128	20191203_66_H4	Tue Dec 24 12:47:35 EST 2019	Sample#2749406768546185314	m	40	40x	Gen1 MCFO (40x)	NA
R12D12	attP2	pBPhsFlp2_PEST_brp_SNAP_MCFO_0128	20191203_66_H5	Tue Dec 24 12:47:35 EST 2019	Sample#2749406769586372706	m	40	40x	Gen1 MCFO (40x)	NA
R12D12	attP2	pBPhsFlp2_PEST_brp_SNAP_MCFO_0128	20191203_66_H6	Tue Dec 24 12:47:35 EST 2019	Sample#2749406770618171490	m	40	40x	Gen1 MCFO (40x)	NA
R12E03	attP2	57C10PEST_brp_SNAP_MCFO_X23_0099	20181121_64_C1	Thu Dec 20 15:36:13 EST 2018	Sample#2615728084980072546	f		40x	Gen1 MCFO (40x)	NA
R12E03	attP2	57C10PEST_brp_SNAP_MCFO_X23_0099	20181121_64_C2	Thu Dec 20 15:36:13 EST 2018	Sample#2615728087131750498	f		40x	Gen1 MCFO (40x)	NA
R12E03	attP2	57C10PEST_brp_SNAP_MCFO_X23_0099	20181121_64_C3	Thu Dec 20 15:36:14 EST 2018	Sample#2615728089723830370	f		40x	Gen1 MCFO (40x)	NA
R12E03	attP2	57C10PEST_brp_SNAP_MCFO_X23_0099	20181121_64_C4	Thu Dec 20 15:36:15 EST 2018	Sample#2615728092211052642	f		40x	Gen1 MCFO (40x)	NA
R12E03	attP2	57C10PEST_brp_SNAP_MCFO_X23_0099	20181121_64_C5	Thu Dec 20 15:36:12 EST 2018	Sample#2615728082169888866	f		40x	Gen1 MCFO (40x)	NA
R12E03	attP2	57C10PEST_brp_SNAP_MCFO_X23_0099	20181121_64_C6	Thu Dec 20 15:36:13 EST 2018	Sample#2615728083860193378	f		40x	Gen1 MCFO (40x)	NA
R12E03	attP2	pBPhsFlp2_PEST_brp_SNAP_MCFO_0128	20191011_63_J1	Tue Oct 29 18:30:03 EDT 2019	Sample#2729184136194424930	m	13	40x	Gen1 MCFO (40x)	NA
R12E03	attP2	pBPhsFlp2_PEST_brp_SNAP_MCFO_0128	20191011_63_J10	Tue Oct 29 18:30:05 EDT 2019	Sample#2729184143890972770	m	13	40x	Gen1 MCFO (40x)	NA
R12E03	attP2	pBPhsFlp2_PEST_brp_SNAP_MCFO_0128	20191011_63_J2	Tue Oct 29 18:30:04 EDT 2019	Sample#2729184137096200290	m	13	40x	Gen1 MCFO (40x)	NA
R12E03	attP2	pBPhsFlp2_PEST_brp_SNAP_MCFO_0128	20191011_63_J3	Tue Oct 29 18:30:04 EDT 2019	Sample#2729184138002169954	m	13	40x	Gen1 MCFO (40x)	NA
R12E03	attP2	pBPhsFlp2_PEST_brp_SNAP_MCFO_0128	20191011_63_J4	Tue Oct 29 18:30:04 EDT 2019	Sample#2729184138908139618	m	13	40x	Gen1 MCFO (40x)	NA
R12E03	attP2	pBPhsFlp2_PEST_brp_SNAP_MCFO_0128	20191011_63_J5	Tue Oct 29 18:30:04 EDT 2019	Sample#2729184139751194722	m	13	40x	Gen1 MCFO (40x)	NA
R12E03	attP2	pBPhsFlp2_PEST_brp_SNAP_MCFO_0128	20191011_63_J6	Tue Oct 29 18:30:04 EDT 2019	Sample#2729184140585861218	m	13	40x	Gen1 MCFO (40x)	NA
R12E03	attP2	pBPhsFlp2_PEST_brp_SNAP_MCFO_0128	20191011_63_J7	Tue Oct 29 18:30:05 EDT 2019	Sample#2729184141416333410	m	13	40x	Gen1 MCFO (40x)	NA
R12E03	attP2	pBPhsFlp2_PEST_brp_SNAP_MCFO_0128	20191011_63_J8	Tue Oct 29 18:30:05 EDT 2019	Sample#2729184142238416994	m	13	40x	Gen1 MCFO (40x)	NA
R12E03	attP2	pBPhsFlp2_PEST_brp_SNAP_MCFO_0128	20191011_63_J9	Tue Oct 29 18:30:05 EDT 2019	Sample#2729184143068889186	m	13	40x	Gen1 MCFO (40x)	NA
R12E04	attP2	57C10PEST_attp18_4stop1	20160407_19_B1	Mon May 09 16:44:17 EDT 2016	Sample#2269649705006792802	f		20x, 63x	Annotator Gen1 MCFO	Jens Goldammer
R12E04	attP2	57C10PEST_attp18_4stop1	20160407_19_B2	Wed Apr 20 15:53:06 EDT 2016	Sample#2262751453867147362	f		20x	Annotator Gen1 MCFO	Jens Goldammer
R12E04	attP2	57C10PEST_attp18_4stop1	20160407_19_B3	Mon May 09 16:44:44 EDT 2016	Sample#2269649817955205218	f		20x, 63x	Annotator Gen1 MCFO	Jens Goldammer
R12E04	attP2	57C10PEST_attp18_4stop1	20160407_19_B4	Mon May 09 16:44:51 EDT 2016	Sample#2269649845625028706	f		20x, 63x	Annotator Gen1 MCFO	Jens Goldammer
R12E04	attP2	57C10PEST_attp18_4stop1	20160407_19_B5	Wed Apr 20 15:53:06 EDT 2016	Sample#2262751455188353122	f		20x	Annotator Gen1 MCFO	Jens Goldammer
R12E04	attP2	57C10PEST_attp18_4stop1	20160407_19_B6	Mon May 09 16:44:58 EDT 2016	Sample#2269649875949846626	f		20x, 63x	Annotator Gen1 MCFO	Jens Goldammer
R12E04	attP2	57C10PEST_attp18_4stop1	20160407_19_B7	Mon May 09 16:45:04 EDT 2016	Sample#2269649901992280162	f		20x, 63x	Annotator Gen1 MCFO	Jens Goldammer
R12E04	attP2	57C10PEST_attp18_4stop1	20160407_19_B8	Mon May 09 16:45:12 EDT 2016	Sample#2269649932791054434	f		20x, 63x	Annotator Gen1 MCFO	Jens Goldammer
R12E04	attP2	57C10PEST_attp18_4stop1	20160407_19_C1	Tue May 17 09:34:51 EDT 2016	Sample#2272440736513261666	f		20x, 63x	Annotator Gen1 MCFO	Jens Goldammer
R12E04	attP2	57C10PEST_attp8_3stop1	20130520_2_F1	Sat Feb 22 05:55:13 EST 2014	Sample#1977054451386548231	f		20x	Annotator Gen1 MCFO	Tanya Wolff
R12E04	attP2	57C10PEST_attp8_3stop1	20130520_2_F3	Sat Feb 22 05:55:13 EST 2014	Sample#1977054452263157767	f		20x	Annotator Gen1 MCFO	Tanya Wolff
R12E04	attP2	57C10PEST_attp8_3stop1	20130520_2_F4	Sat Feb 22 05:55:13 EST 2014	Sample#1977054453089435655	f		20x	Annotator Gen1 MCFO	Tanya Wolff
R12E04	attP2	57C10PEST_attp8_3stop1	20130520_2_F6	Sat Feb 22 05:55:13 EST 2014	Sample#1977054453743747079	f		20x	Annotator Gen1 MCFO	Tanya Wolff
R12E04	attP2	57C10PEST_attp8_3stop1	20130520_2_G1	Sat Feb 22 05:55:13 EST 2014	Sample#1977054454297395207	f		20x	Annotator Gen1 MCFO	Tanya Wolff
R12E04	attP2	57C10PEST_attp8_3stop1	20130520_2_G2	Sat Feb 22 05:55:13 EST 2014	Sample#1977054455081730055	f		20x	Annotator Gen1 MCFO	Tanya Wolff
R12E04	attP2	57C10PEST_attp8_3stop1	20130520_2_G3	Sat Feb 22 05:55:14 EST 2014	Sample#1977054455585046535	f		20x	Annotator Gen1 MCFO	Tanya Wolff
R12E04	attP2	57C10PEST_attp8_3stop1	20130520_2_G4	Sat Feb 22 05:55:14 EST 2014	Sample#1977054456239357959	f		20x	Annotator Gen1 MCFO	Tanya Wolff
R12E04	attP2	57C10PEST_attp8_3stop1	20130520_2_G5	Sat Feb 22 05:55:14 EST 2014	Sample#1977054456822366215	f		20x	Annotator Gen1 MCFO	Tanya Wolff
R12E04	attP2	57C10PEST_brp_SNAP_MCFO_X23_0099	20181121_64_D1	Thu Dec 20 15:36:13 EST 2018	Sample#2615728086074785890	f		40x	Gen1 MCFO (40x)	NA
R12E04	attP2	57C10PEST_brp_SNAP_MCFO_X23_0099	20181121_64_D2	Thu Dec 20 15:36:13 EST 2018	Sample#2615728087706370146	f		40x	Gen1 MCFO (40x)	NA
R12E04	attP2	57C10PEST_brp_SNAP_MCFO_X23_0099	20181121_64_D3	Thu Dec 20 15:36:14 EST 2018	Sample#2615728089652527202	f		40x	Gen1 MCFO (40x)	NA
R12E04	attP2	57C10PEST_brp_SNAP_MCFO_X23_0099	20181121_64_D4	Thu Dec 20 15:36:14 EST 2018	Sample#2615728090847903842	f		40x	Gen1 MCFO (40x)	NA
R12E04	attP2	57C10PEST_brp_SNAP_MCFO_X23_0099	20181121_64_D5	Thu Jan 17 11:50:24 EST 2019	Sample#2625818116088660022	f		40x	Gen1 MCFO (40x)	NA
R12E04	attP2	57C10PEST_brp_SNAP_MCFO_X23_0099	20181121_64_D6	Thu Dec 20 15:36:13 EST 2018	Sample#2615728084401258594	f		40x	Gen1 MCFO (40x)	NA
R12E04	attP2	pBPhsFlp2_PEST_brp_SNAP_MCFO_0128	20191022_63_G1	Mon Nov 04 18:58:04 EST 2019	Sample#2731380610126839906	m	40	40x	Gen1 MCFO (40x)	NA
R12E04	attP2	pBPhsFlp2_PEST_brp_SNAP_MCFO_0128	20191022_63_G2	Mon Nov 04 18:58:04 EST 2019	Sample#2731380611049586786	m	40	40x	Gen1 MCFO (40x)	NA
R12E04	attP2	pBPhsFlp2_PEST_brp_SNAP_MCFO_0128	20191022_63_G3	Mon Nov 04 18:58:04 EST 2019	Sample#2731380611955556450	m	40	40x	Gen1 MCFO (40x)	NA
R12E04	attP2	pBPhsFlp2_PEST_brp_SNAP_MCFO_0128	20191022_63_G4	Mon Nov 04 18:58:04 EST 2019	Sample#2731380612811194466	m	40	40x	Gen1 MCFO (40x)	NA
R12E04	attP2	pBPhsFlp2_PEST_brp_SNAP_MCFO_0128	20191022_63_G5	Mon Nov 04 18:58:04 EST 2019	Sample#2731380613662638178	m	40	40x	Gen1 MCFO (40x)	NA
R12E04	attP2	pBPhsFlp2_PEST_brp_SNAP_MCFO_0128	20191022_63_G6	Mon Nov 04 18:58:05 EST 2019	Sample#2731380614509887586	m	40	40x	Gen1 MCFO (40x)	NA
R12E04	attP2	pBPhsFlp2_PEST_brp_SNAP_MCFO_0128	20191022_63_G7	Mon Nov 04 18:58:05 EST 2019	Sample#2731380615378108514	m	40	40x	Gen1 MCFO (40x)	NA
R12E04	attP2	pBPhsFlp2_PEST_brp_SNAP_MCFO_0128	20191022_63_G8	Mon Nov 04 18:58:05 EST 2019	Sample#2731380616229552226	m	40	40x	Gen1 MCFO (40x)	NA
R12E07	attP2	57C10PEST_brp_SNAP_MCFO_X23_0099	20181109_63_A1	Wed Nov 28 11:53:26 EST 2018	Sample#2607699486205542498	f		40x	Gen1 MCFO (40x)	NA
R12E07	attP2	57C10PEST_brp_SNAP_MCFO_X23_0099	20181109_63_A2	Wed Nov 28 11:53:26 EST 2018	Sample#2607699486767579234	f		40x	Gen1 MCFO (40x)	NA
R12E07	attP2	57C10PEST_brp_SNAP_MCFO_X23_0099	20181109_63_A3	Wed Nov 28 11:53:26 EST 2018	Sample#2607699487329615970	f		40x	Gen1 MCFO (40x)	NA
R12E07	attP2	57C10PEST_brp_SNAP_MCFO_X23_0099	20181109_63_A4	Wed Nov 28 11:53:26 EST 2018	Sample#2607699487879069794	f		40x	Gen1 MCFO (40x)	NA
R12E07	attP2	57C10PEST_brp_SNAP_MCFO_X23_0099	20181109_63_A5	Wed Nov 28 11:53:35 EST 2018	Sample#2607699527175503970	f		40x	Gen1 MCFO (40x)	NA
R12E09	attP2	57C10PEST_brp_SNAP_MCFO_X23_0099	20190115_66_D1	Wed Jan 23 12:31:07 EST 2019	Sample#2628002691665625186	f		40x	Gen1 MCFO (40x)	NA
R12E09	attP2	57C10PEST_brp_SNAP_MCFO_X23_0099	20190115_66_D2	Wed Jan 23 12:41:04 EST 2019	Sample#2628005195568644194	f		40x	Gen1 MCFO (40x)	NA
R12E09	attP2	57C10PEST_brp_SNAP_MCFO_X23_0099	20190115_66_D3	Wed Jan 23 12:41:04 EST 2019	Sample#2628005196222955618	f		40x	Gen1 MCFO (40x)	NA
R12E09	attP2	57C10PEST_brp_SNAP_MCFO_X23_0099	20190115_66_D4	Wed Jan 23 12:41:04 EST 2019	Sample#2628005196814352482	f		40x	Gen1 MCFO (40x)	NA
R12E09	attP2	57C10PEST_brp_SNAP_MCFO_X23_0099	20190115_66_D5	Wed Jan 23 12:41:05 EST 2019	Sample#2628005197405749346	f		40x	Gen1 MCFO (40x)	NA
R12E09	attP2	57C10PEST_brp_SNAP_MCFO_X23_0099	20190115_66_D6	Wed Jan 23 12:41:05 EST 2019	Sample#2628005198005534818	f		40x	Gen1 MCFO (40x)	NA
R12E09	attP2	pBPhsFlp2_PEST_brp_SNAP_MCFO_0128	20190816_66_D1	Mon Sep 09 17:50:37 EDT 2019	Sample#2711054819514122338	m	13	40x	Gen1 MCFO (40x)	NA
R12E09	attP2	pBPhsFlp2_PEST_brp_SNAP_MCFO_0128	20190816_66_D2	Mon Sep 09 17:50:38 EDT 2019	Sample#2711054820013244514	m	13	40x	Gen1 MCFO (40x)	NA
R12E09	attP2	pBPhsFlp2_PEST_brp_SNAP_MCFO_0128	20190816_66_D3	Mon Sep 09 17:50:38 EDT 2019	Sample#2711054820512366690	m	13	40x	Gen1 MCFO (40x)	NA
R12E09	attP2	pBPhsFlp2_PEST_brp_SNAP_MCFO_0128	20190816_66_D4	Mon Sep 09 17:50:38 EDT 2019	Sample#2711054820940185698	m	13	40x	Gen1 MCFO (40x)	NA
R12E09	attP2	pBPhsFlp2_PEST_brp_SNAP_MCFO_0128	20190816_66_D5	Mon Sep 09 17:50:38 EDT 2019	Sample#2711054821363810402	m	13	40x	Gen1 MCFO (40x)	NA
R12E09	attP2	pBPhsFlp2_PEST_brp_SNAP_MCFO_0128	20190816_66_D6	Mon Sep 09 17:50:38 EDT 2019	Sample#2711054821787435106	m	13	40x	Gen1 MCFO (40x)	NA
R12E09	attP2	pBPhsFlp2_PEST_brp_SNAP_MCFO_0128	20190816_66_E1	Mon Sep 09 17:50:38 EDT 2019	Sample#2711054822211059810	m	13	40x	Gen1 MCFO (40x)	NA
R12E09	attP2	pBPhsFlp2_PEST_brp_SNAP_MCFO_0128	20190816_66_E2	Mon Sep 09 17:50:38 EDT 2019	Sample#2711054822630490210	m	13	40x	Gen1 MCFO (40x)	NA
R12E09	attP2	pBPhsFlp2_PEST_brp_SNAP_MCFO_0128	20190816_66_E3	Mon Sep 09 17:50:38 EDT 2019	Sample#2711054823049920610	m	13	40x	Gen1 MCFO (40x)	NA
R12E09	attP2	pBPhsFlp2_PEST_brp_SNAP_MCFO_0128	20190816_66_E4	Mon Sep 09 17:50:38 EDT 2019	Sample#2711054823473545314	m	13	40x	Gen1 MCFO (40x)	NA
R12F01	attP2	57C10PEST_brp_SNAP_MCFO_X23_0099	20181121_64_E1	Thu Dec 20 15:36:13 EST 2018	Sample#2615728085458223202	f		40x	Gen1 MCFO (40x)	NA
R12F01	attP2	57C10PEST_brp_SNAP_MCFO_X23_0099	20181121_64_E2	Thu Dec 20 15:36:13 EST 2018	Sample#2615728087135944802	f		40x	Gen1 MCFO (40x)	NA
R12F01	attP2	57C10PEST_brp_SNAP_MCFO_X23_0099	20181121_64_E3	Thu Dec 20 15:36:14 EST 2018	Sample#2615728088436179042	f		40x	Gen1 MCFO (40x)	NA
R12F01	attP2	57C10PEST_brp_SNAP_MCFO_X23_0099	20181121_64_E4	Thu Dec 20 15:36:14 EST 2018	Sample#2615728089736413282	f		40x	Gen1 MCFO (40x)	NA
R12F01	attP2	57C10PEST_brp_SNAP_MCFO_X23_0099	20181121_64_E5	Thu Dec 20 15:36:14 EST 2018	Sample#2615728090868875362	f		40x	Gen1 MCFO (40x)	NA
R12F01	attP2	57C10PEST_brp_SNAP_MCFO_X23_0099	20181121_64_E6	Thu Jan 17 11:50:26 EST 2019	Sample#2625818125324517430	f		40x	Gen1 MCFO (40x)	NA
R12F01	attP2	pBPhsFlp2_PEST_brp_SNAP_MCFO_0128	20191022_63_H1	Mon Nov 04 18:58:05 EST 2019	Sample#2731380617076801634	m	40	40x	Gen1 MCFO (40x)	NA
R12F01	attP2	pBPhsFlp2_PEST_brp_SNAP_MCFO_0128	20191022_63_H2	Mon Nov 04 18:58:05 EST 2019	Sample#2731380618016325730	m	40	40x	Gen1 MCFO (40x)	NA
R12F01	attP2	pBPhsFlp2_PEST_brp_SNAP_MCFO_0128	20191022_63_H3	Mon Nov 04 18:58:06 EST 2019	Sample#2731380618934878306	m	40	40x	Gen1 MCFO (40x)	NA
R12F01	attP2	pBPhsFlp2_PEST_brp_SNAP_MCFO_0128	20191022_63_H4	Mon Nov 04 18:58:06 EST 2019	Sample#2731380619786322018	m	40	40x	Gen1 MCFO (40x)	NA
R12F01	attP2	pBPhsFlp2_PEST_brp_SNAP_MCFO_0128	20191022_63_H5	Mon Nov 04 18:58:06 EST 2019	Sample#2731380620646154338	m	40	40x	Gen1 MCFO (40x)	NA
R12F01	attP2	pBPhsFlp2_PEST_brp_SNAP_MCFO_0128	20191022_63_H6	Mon Nov 04 18:58:06 EST 2019	Sample#2731380621518569570	m	40	40x	Gen1 MCFO (40x)	NA
R12F01	attP2	pBPhsFlp2_PEST_brp_SNAP_MCFO_0128	20191022_63_H7	Mon Nov 04 18:58:06 EST 2019	Sample#2731380622370013282	m	40	40x	Gen1 MCFO (40x)	NA
R12F02	attP2	57C10PEST_attp18_4stop1	20161209_19_F1	Thu Dec 22 18:35:39 EST 2016	Sample#2351954873739640930	f	15	20x	Annotator Gen1 MCFO	Masayoshi Ito
R12F02	attP2	57C10PEST_attp18_4stop1	20161209_19_F2	Thu Dec 22 18:35:39 EST 2016	Sample#2351954873890635874	f	15	20x, 63x	Annotator Gen1 MCFO	Masayoshi Ito
R12F02	attP2	57C10PEST_attp18_4stop1	20161209_19_F3	Thu Dec 22 18:35:39 EST 2016	Sample#2351954874041630818	f	15	20x	Annotator Gen1 MCFO	Masayoshi Ito
R12F02	attP2	57C10PEST_attp18_4stop1	20161209_19_F4	Thu Dec 22 18:35:39 EST 2016	Sample#2351954874192625762	f	15	20x	Annotator Gen1 MCFO	Masayoshi Ito
R12F02	attP2	57C10PEST_attp18_4stop1	20161209_19_F5	Thu Dec 22 18:35:39 EST 2016	Sample#2351954874339426402	f	15	20x, 63x	Annotator Gen1 MCFO	Masayoshi Ito
R12F02	attP2	57C10PEST_attp18_4stop1	20161209_19_F6	Thu Dec 22 18:35:39 EST 2016	Sample#2351954874490421346	f	15	20x	Annotator Gen1 MCFO	Masayoshi Ito
R12F03	attP2	57C10wt_attp8_3stop1	20130606_3_D3	Thu Apr 24 20:10:07 EDT 2014	Sample#1999360155837268066	f		20x	Annotator Gen1 MCFO	Tanya Wolff
R12F03	attP2	57C10wt_attp8_3stop1	20130606_3_D4	Thu Apr 24 20:10:07 EDT 2014	Sample#1999360156529328226	f		20x	Annotator Gen1 MCFO	Tanya Wolff
R12F03	attP2	57C10wt_attp8_3stop1	20130606_3_D5	Thu Apr 24 20:10:07 EDT 2014	Sample#1999360157187833954	f		20x	Annotator Gen1 MCFO	Tanya Wolff
R12F03	attP2	57C10wt_attp8_3stop1	20130606_3_D6	Thu Apr 24 20:10:07 EDT 2014	Sample#1999360157930225762	f		20x	Annotator Gen1 MCFO	Tanya Wolff
R12F03	attP2	57C10wt_attp8_3stop1	20130606_3_E1	Thu Apr 24 20:10:08 EDT 2014	Sample#1999360158588731490	f		20x	Annotator Gen1 MCFO	Tanya Wolff
R12F03	attP2	57C10wt_attp8_3stop1	20130606_3_E2	Thu Apr 24 20:10:08 EDT 2014	Sample#1999360159234654306	f		20x	Annotator Gen1 MCFO	Tanya Wolff
R12F03	attP2	57C10wt_attp8_3stop1	20130606_3_E3	Thu Apr 24 20:10:08 EDT 2014	Sample#1999360159960268898	f		20x	Annotator Gen1 MCFO	Tanya Wolff
R12F03	attP2	57C10wt_attp8_3stop1	20130606_3_E4	Thu Apr 24 20:10:08 EDT 2014	Sample#1999360160669106274	f		20x	Annotator Gen1 MCFO	Tanya Wolff
R12F03	attP2	57C10wt_attp8_3stop1	20130612_2_B4	Thu Apr 24 20:10:29 EDT 2014	Sample#1999360249227640930	f		20x	Annotator Gen1 MCFO	Tanya Wolff
R12F03	attP2	57C10wt_attp8_3stop1	20130612_2_B5	Thu Apr 24 20:10:29 EDT 2014	Sample#1999360249902923874	f		20x	Annotator Gen1 MCFO	Tanya Wolff
R12F03	attP2	57C10wt_attp8_3stop1	20130612_2_B6	Thu Apr 24 20:10:30 EDT 2014	Sample#1999360250636927074	f		20x	Annotator Gen1 MCFO	Tanya Wolff
R12F03	attP2	57C10wt_attp8_3stop1	20130612_2_C1	Thu Apr 24 20:10:30 EDT 2014	Sample#1999360251391901794	f		20x	Annotator Gen1 MCFO	Tanya Wolff
R12F03	attP2	57C10wt_attp8_3stop1	20130612_2_C2	Thu Apr 24 20:10:30 EDT 2014	Sample#1999360252046213218	f		20x	Annotator Gen1 MCFO	Tanya Wolff
R12F03	attP2	57C10wt_attp8_3stop1	20130612_2_C3	Thu Apr 24 20:10:30 EDT 2014	Sample#1999360252776022114	f		20x	Annotator Gen1 MCFO	Tanya Wolff
R12F03	attP2	57C10wt_attp8_3stop1	20130612_2_C4	Thu Apr 24 20:10:30 EDT 2014	Sample#1999360253409362018	f		20x	Annotator Gen1 MCFO	Tanya Wolff
R12F03	attP2	57C10PEST_brp_SNAP_MCFO_X23_0099	20181121_64_F1	Thu Dec 20 15:36:15 EST 2018	Sample#2615728092215246946	f		40x	Gen1 MCFO (40x)	NA
R12F03	attP2	57C10PEST_brp_SNAP_MCFO_X23_0099	20181121_64_F2	Thu Jan 17 11:50:26 EST 2019	Sample#2625818126767358006	f		40x	Gen1 MCFO (40x)	NA
R12F03	attP2	57C10PEST_brp_SNAP_MCFO_X23_0099	20181121_64_F3	Thu Dec 20 15:36:15 EST 2018	Sample#2615728094824104034	f		40x	Gen1 MCFO (40x)	NA
R12F03	attP2	57C10PEST_brp_SNAP_MCFO_X23_0099	20181121_64_F4	Tue Dec 11 12:27:01 EST 2018	Sample#2612418980169646178	f		40x	Gen1 MCFO (40x)	NA
R12F03	attP2	57C10PEST_brp_SNAP_MCFO_X23_0099	20181121_64_F5	Tue Dec 11 12:27:01 EST 2018	Sample#2612418980752654434	f		40x	Gen1 MCFO (40x)	NA
R12F03	attP2	57C10PEST_brp_SNAP_MCFO_X23_0099	20181121_64_F6	Tue Dec 11 12:27:01 EST 2018	Sample#2612418981327274082	f		40x	Gen1 MCFO (40x)	NA
R12F03	attP2	57C10PEST_brp_SNAP_MCFO_X23_0099	20181121_64_G1	Tue Dec 11 12:27:01 EST 2018	Sample#2612418981897699426	f		40x	Gen1 MCFO (40x)	NA
R12F03	attP2	57C10PEST_brp_SNAP_MCFO_X23_0099	20181121_64_G2	Tue Dec 11 12:27:01 EST 2018	Sample#2612418982472319074	f		40x	Gen1 MCFO (40x)	NA
R12F03	attP2	pBPhsFlp2_PEST_brp_SNAP_MCFO_0128	20191011_63_K1	Tue Oct 29 18:30:05 EDT 2019	Sample#2729184144746610786	m	13	40x	Gen1 MCFO (40x)	NA
R12F03	attP2	pBPhsFlp2_PEST_brp_SNAP_MCFO_0128	20191011_63_K10	Tue Oct 29 18:30:07 EDT 2019	Sample#2729184152409604194	m	13	40x	Gen1 MCFO (40x)	NA
R12F03	attP2	pBPhsFlp2_PEST_brp_SNAP_MCFO_0128	20191011_63_K2	Tue Oct 29 18:30:06 EDT 2019	Sample#2729184145648386146	m	13	40x	Gen1 MCFO (40x)	NA
R12F03	attP2	pBPhsFlp2_PEST_brp_SNAP_MCFO_0128	20191011_63_K3	Tue Oct 29 18:30:06 EDT 2019	Sample#2729184146554355810	m	13	40x	Gen1 MCFO (40x)	NA
R12F03	attP2	pBPhsFlp2_PEST_brp_SNAP_MCFO_0128	20191011_63_K4	Tue Oct 29 18:30:06 EDT 2019	Sample#2729184147456131170	m	13	40x	Gen1 MCFO (40x)	NA
R12F03	attP2	pBPhsFlp2_PEST_brp_SNAP_MCFO_0128	20191011_63_K5	Tue Oct 29 18:30:06 EDT 2019	Sample#2729184148286603362	m	13	40x	Gen1 MCFO (40x)	NA
R12F03	attP2	pBPhsFlp2_PEST_brp_SNAP_MCFO_0128	20191011_63_K6	Tue Oct 29 18:30:06 EDT 2019	Sample#2729184149112881250	m	13	40x	Gen1 MCFO (40x)	NA
R12F03	attP2	pBPhsFlp2_PEST_brp_SNAP_MCFO_0128	20191011_63_K7	Tue Oct 29 18:30:07 EDT 2019	Sample#2729184149947547746	m	13	40x	Gen1 MCFO (40x)	NA
R12F03	attP2	pBPhsFlp2_PEST_brp_SNAP_MCFO_0128	20191011_63_K8	Tue Oct 29 18:30:07 EDT 2019	Sample#2729184150769631330	m	13	40x	Gen1 MCFO (40x)	NA
R12F03	attP2	pBPhsFlp2_PEST_brp_SNAP_MCFO_0128	20191011_63_K9	Tue Oct 29 18:30:07 EDT 2019	Sample#2729184151591714914	m	13	40x	Gen1 MCFO (40x)	NA
R12F04	attP2	57C10PEST_attp18_4stop1	20161222_22_B1	Wed Jan 04 15:29:53 EST 2017	Sample#2356619166053564514	f	15	20x, 63x	Annotator Gen1 MCFO	Jens Goldammer
R12F04	attP2	57C10PEST_attp18_4stop1	20161222_22_B4	Wed Jan 04 15:29:53 EST 2017	Sample#2356619166468800610	f		20x	Annotator Gen1 MCFO	Jens Goldammer
R12F04	attP2	57C10PEST_attp18_4stop1	20161222_22_B5	Wed Jan 04 15:29:53 EST 2017	Sample#2356619166607212642	f		20x, 63x	Annotator Gen1 MCFO	Jens Goldammer
R12F04	attP2	57C10PEST_attp18_4stop1	20161222_22_B7	Wed Jan 04 15:29:53 EST 2017	Sample#2356619166884036706	f	15	20x, 63x	Annotator Gen1 MCFO	Jens Goldammer
R12F04	attP2	57C10PEST_attp18_4stop1	20161222_22_B8	Wed Jan 04 15:29:53 EST 2017	Sample#2356619167022448738	f		20x	Annotator Gen1 MCFO	Jens Goldammer
R12F10	attP2	57C10wt_attp8_3stop1	20130606_3_E5	Thu Apr 24 20:10:08 EDT 2014	Sample#1999360161478606946	f		20x	Annotator Gen1 MCFO	Tanya Wolff
R12F10	attP2	57C10wt_attp8_3stop1	20130606_3_E6	Thu Apr 24 20:10:08 EDT 2014	Sample#1999360162212610146	f		20x	Annotator Gen1 MCFO	Tanya Wolff
R12F10	attP2	57C10wt_attp8_3stop1	20130606_3_F1	Thu Apr 24 20:10:09 EDT 2014	Sample#1999360162883698786	f		20x	Annotator Gen1 MCFO	Tanya Wolff
R12F10	attP2	57C10wt_attp8_3stop1	20130606_3_F2	Thu Apr 24 20:10:09 EDT 2014	Sample#1999360163575758946	f		20x	Annotator Gen1 MCFO	Tanya Wolff
R12F10	attP2	57C10wt_attp8_3stop1	20130606_3_F3	Thu Apr 24 20:10:09 EDT 2014	Sample#1999360164217487458	f		20x	Annotator Gen1 MCFO	Tanya Wolff
R12F10	attP2	57C10wt_attp8_3stop1	20130606_3_F4	Thu Apr 24 20:10:09 EDT 2014	Sample#1999360164905353314	f		20x	Annotator Gen1 MCFO	Tanya Wolff
R12F10	attP2	57C10wt_attp8_3stop1	20130606_3_F5	Thu Apr 24 20:10:09 EDT 2014	Sample#1999360165521916002	f		20x	Annotator Gen1 MCFO	Tanya Wolff
R12F10	attP2	57C10wt_attp8_3stop1	20130606_3_F6	Thu Apr 24 20:10:09 EDT 2014	Sample#1999360166151061602	f		20x	Annotator Gen1 MCFO	Tanya Wolff
R12F10	attP2	57C10wt_attp8_3stop1	20130606_3_G1	Thu Apr 24 20:10:10 EDT 2014	Sample#1999360166830538850	f		20x	Annotator Gen1 MCFO	Tanya Wolff
R12F10	attP2	57C10wt_attp8_3stop1	20130606_3_G2	Thu Apr 24 20:10:10 EDT 2014	Sample#1999360167648428130	f		20x	Annotator Gen1 MCFO	Tanya Wolff
R12F10	attP2	57C10wt_attp8_3stop1	20130612_2_C6	Thu Apr 24 20:10:31 EDT 2014	Sample#1999360254931894370	f		20x	Annotator Gen1 MCFO	Tanya Wolff
R12F10	attP2	57C10wt_attp8_3stop1	20130612_2_D1	Thu Apr 24 20:10:31 EDT 2014	Sample#1999360255590400098	f		20x	Annotator Gen1 MCFO	Tanya Wolff
R12F10	attP2	57C10wt_attp8_3stop1	20130612_2_D2	Mon Jan 18 10:40:53 EST 2016	Sample#2228985910333014114	f	15	20x, 63x	Annotator Gen1 MCFO	Tanya Wolff
R12F10	attP2	57C10wt_attp8_3stop1	20130612_2_D3	Mon Jan 18 10:42:58 EST 2016	Sample#2228986432221872226	f	15	20x, 63x	Annotator Gen1 MCFO	Tanya Wolff
R12F10	attP2	57C10wt_attp8_3stop1	20130612_2_D4	Tue Apr 28 14:19:22 EDT 2015	Sample#2132993011322191970	f	15	20x, 63x	Annotator Gen1 MCFO	Tanya Wolff
R12F10	attP2	57C10wt_attp8_3stop1	20130612_2_D5	Thu Apr 24 20:10:31 EDT 2014	Sample#1999360258455109730	f		20x	Annotator Gen1 MCFO	Tanya Wolff
R12G01	attP2	57C10PEST_attp18_4stop1	20140320_34_E2	Thu Apr 24 20:11:25 EDT 2014	Sample#1999360484410654818	f	15	20x	Annotator Gen1 MCFO	Aljoscha Nern
R12G01	attP2	57C10PEST_attp18_4stop1	20140320_34_E3	Thu Apr 24 20:11:26 EDT 2014	Sample#1999360485476008034	f	15	20x	Annotator Gen1 MCFO	Aljoscha Nern
R12G01	attP2	57C10PEST_attp18_4stop1	20140320_34_E4	Thu Apr 24 20:11:26 EDT 2014	Sample#1999360486436503650	f	15	20x	Annotator Gen1 MCFO	Aljoscha Nern
R12G01	attP2	57C10PEST_attp18_4stop1	20140320_34_E5	Thu Apr 24 20:11:26 EDT 2014	Sample#1999360487204061282	f	15	20x	Annotator Gen1 MCFO	Aljoscha Nern
R12G01	attP2	57C10PEST_attp18_4stop1	20140320_34_E6	Thu Apr 24 20:11:26 EDT 2014	Sample#1999360487933870178	f	15	20x	Annotator Gen1 MCFO	Aljoscha Nern
R12G01	attP2	57C10PEST_attp18_4stop1	20140320_34_E7	Thu Apr 24 20:11:26 EDT 2014	Sample#1999360488751759458	f	15	20x	Annotator Gen1 MCFO	Aljoscha Nern
R12G01	attP2	57C10PEST_attp18_4stop1	20140320_34_E8	Thu Apr 24 20:11:27 EDT 2014	Sample#1999360489523511394	f	15	20x	Annotator Gen1 MCFO	Aljoscha Nern
R12G01	attP2	57C10PEST_attp8_3stop1	20130520_3_A1	Mon Feb 24 14:16:05 EST 2014	Sample#1977905274211532898	f		20x	Annotator Gen1 MCFO	Tanya Wolff
R12G01	attP2	57C10PEST_attp8_3stop1	20130520_3_A2	Mon Feb 24 14:16:05 EST 2014	Sample#1977905274794541154	f		20x	Annotator Gen1 MCFO	Tanya Wolff
R12G01	attP2	57C10PEST_attp8_3stop1	20130520_3_A3	Mon Feb 24 14:16:05 EST 2014	Sample#1977905275323023458	f		20x	Annotator Gen1 MCFO	Tanya Wolff
R12G01	attP2	57C10PEST_attp8_3stop1	20130520_3_A4	Mon Feb 24 14:16:05 EST 2014	Sample#1977905275880865890	f		20x	Annotator Gen1 MCFO	Tanya Wolff
R12G01	attP2	57C10PEST_attp8_3stop1	20130520_3_A5	Mon Feb 24 14:16:05 EST 2014	Sample#1977905276417736802	f		20x	Annotator Gen1 MCFO	Tanya Wolff
R12G01	attP2	57C10PEST_attp8_3stop1	20130520_3_A6	Mon Feb 24 14:16:05 EST 2014	Sample#1977905276858138722	f		20x	Annotator Gen1 MCFO	Tanya Wolff
R12G01	attP2	57C10PEST_attp8_3stop1	20130520_3_B1	Mon Feb 24 14:16:05 EST 2014	Sample#1977905277353066594	f		20x	Annotator Gen1 MCFO	Tanya Wolff
R12G01	attP2	57C10PEST_attp8_3stop1	20130520_3_B2	Mon Feb 24 14:16:05 EST 2014	Sample#1977905277881548898	f		20x	Annotator Gen1 MCFO	Tanya Wolff
R12G01	attP2	57C10PEST_attp8_3stop1	20130520_3_B3	Mon Feb 24 14:16:06 EST 2014	Sample#1977905278552637538	f		20x	Annotator Gen1 MCFO	Tanya Wolff
R12G01	attP2	57C10PEST_attp8_3stop1	20130520_3_B4	Mon Feb 24 14:16:06 EST 2014	Sample#1977905278980456546	f		20x	Annotator Gen1 MCFO	Tanya Wolff
R12G01	attP2	57C10PEST_attp8_3stop1	20130520_3_B5	Mon Feb 24 14:16:06 EST 2014	Sample#1977905279374721122	f		20x	Annotator Gen1 MCFO	Tanya Wolff
R12G01	attP2	57C10PEST_attp8_3stop1	20130520_3_B6	Mon Feb 24 14:16:06 EST 2014	Sample#1977905279785762914	f		20x	Annotator Gen1 MCFO	Tanya Wolff
R12G01	attP2	57C10PEST_attp8_3stop1	20130520_3_C1	Mon Feb 24 14:16:06 EST 2014	Sample#1977905280263913570	f		20x	Annotator Gen1 MCFO	Tanya Wolff
R12G01	attP2	57C10PEST_attp8_3stop1	20130520_3_C2	Mon Feb 24 14:16:06 EST 2014	Sample#1977905280633012322	f		20x	Annotator Gen1 MCFO	Tanya Wolff
R12G01	attP2	57C10PEST_attp8_3stop1	20130520_3_C3	Mon Feb 24 14:16:06 EST 2014	Sample#1977905280989528162	f		20x	Annotator Gen1 MCFO	Tanya Wolff
R12G01	attP2	57C10PEST_attp8_3stop1	20130725_1_C3	Tue May 13 14:09:20 EDT 2014	Sample#2006154733244383330	f		20x	Annotator Gen1 MCFO	Tanya Wolff
R12G01	attP2	57C10PEST_attp8_3stop1	20130725_1_C4	Tue May 13 14:09:21 EDT 2014	Sample#2006154734418788450	f		20x	Annotator Gen1 MCFO	Tanya Wolff
R12G01	attP2	57C10PEST_attp8_3stop1	20130725_1_C6	Tue May 13 14:09:21 EDT 2014	Sample#2006154736675324002	f		20x	Annotator Gen1 MCFO	Tanya Wolff
R12G01	attP2	57C10PEST_brp_SNAP_MCFO_X23_0099	20180831_61_I1	Wed Sep 19 13:57:34 EDT 2018	Sample#2582348475467300962	f		40x	Gen1 MCFO (40x)	NA
R12G01	attP2	57C10PEST_brp_SNAP_MCFO_X23_0099	20180831_61_I2	Wed Sep 19 13:57:34 EDT 2018	Sample#2582348475760902242	f		40x	Gen1 MCFO (40x)	NA
R12G01	attP2	57C10PEST_brp_SNAP_MCFO_X23_0099	20180831_61_I3	Wed Sep 19 13:57:34 EDT 2018	Sample#2582348476058697826	f		40x	Gen1 MCFO (40x)	NA
R12G01	attP2	57C10PEST_brp_SNAP_MCFO_X23_0099	20180831_61_I4	Wed Sep 19 13:57:34 EDT 2018	Sample#2582348476352299106	f		40x	Gen1 MCFO (40x)	NA
R12G01	attP2	57C10PEST_brp_SNAP_MCFO_X23_0099	20180831_61_I5	Wed Sep 19 13:57:34 EDT 2018	Sample#2582348476671066210	f		40x	Gen1 MCFO (40x)	NA
R12G01	attP2	57C10PEST_brp_SNAP_MCFO_X23_0099	20180831_61_I6	Wed Sep 19 13:57:34 EDT 2018	Sample#2582348476981444706	f		40x	Gen1 MCFO (40x)	NA
R12G02	attP2	57C10L_brp_SNAP_MCFO_X23_0117	20190614_62_I1	Thu Jul 11 12:12:40 EDT 2019	Sample#2689226497650065506	m		40x	Gen1 MCFO (40x)	NA
R12G02	attP2	57C10L_brp_SNAP_MCFO_X23_0117	20190614_62_I2	Thu Jul 11 12:12:40 EDT 2019	Sample#2689226498090467426	m		40x	Gen1 MCFO (40x)	NA
R12G02	attP2	57C10L_brp_SNAP_MCFO_X23_0117	20190614_62_I3	Thu Jul 11 12:12:40 EDT 2019	Sample#2689226498505703522	m		40x	Gen1 MCFO (40x)	NA
R12G02	attP2	57C10L_brp_SNAP_MCFO_X23_0117	20190614_62_I4	Thu Jul 11 12:12:40 EDT 2019	Sample#2689226498916745314	m		40x	Gen1 MCFO (40x)	NA
R12G02	attP2	57C10L_brp_SNAP_MCFO_X23_0117	20190614_62_I5	Thu Jul 11 12:12:40 EDT 2019	Sample#2689226499357147234	m		40x	Gen1 MCFO (40x)	NA
R12G02	attP2	57C10L_brp_SNAP_MCFO_X23_0117	20190614_62_I6	Wed Jul 31 13:53:39 EDT 2019	Sample#2696499668946255970	m		40x	Gen1 MCFO (40x)	NA
R12G02	attP2	pBPhsFlp2_PEST_brp_SNAP_MCFO_0128	20190702_65_A1	Wed Jul 24 12:49:23 EDT 2019	Sample#2693946780403368034	f	40	40x	Gen1 MCFO (40x)	NA
R12G02	attP2	pBPhsFlp2_PEST_brp_SNAP_MCFO_0128	20190702_65_A2	Wed Jul 24 12:49:23 EDT 2019	Sample#2693946780910878818	f	40	40x	Gen1 MCFO (40x)	NA
R12G02	attP2	pBPhsFlp2_PEST_brp_SNAP_MCFO_0128	20190702_65_A3	Wed Jul 24 12:49:23 EDT 2019	Sample#2693946781355475042	f	40	40x	Gen1 MCFO (40x)	NA
R12G02	attP2	pBPhsFlp2_PEST_brp_SNAP_MCFO_0128	20190702_65_A4	Wed Jul 24 12:49:23 EDT 2019	Sample#2693946781749739618	f	40	40x	Gen1 MCFO (40x)	NA
R12G02	attP2	pBPhsFlp2_PEST_brp_SNAP_MCFO_0128	20190702_65_A5	Wed Jul 24 12:49:23 EDT 2019	Sample#2693946782135615586	f	40	40x	Gen1 MCFO (40x)	NA
R12G03	attP2	57C10PEST_attp18_4stop1	20160303_19_F1	Fri Mar 11 15:12:40 EST 2016	Sample#2248260863783862370	f		20x	Annotator Gen1 MCFO	Masayoshi Ito
R12G03	attP2	57C10PEST_attp18_4stop1	20160303_19_F2	Thu Mar 31 07:48:46 EDT 2016	Sample#2255381810655526949	f		20x, 63x	Annotator Gen1 MCFO	Masayoshi Ito
R12G03	attP2	57C10PEST_attp18_4stop1	20160303_19_F3	Fri Mar 11 15:12:40 EST 2016	Sample#2248260864580780130	f		20x	Annotator Gen1 MCFO	Masayoshi Ito
R12G03	attP2	57C10PEST_attp18_4stop1	20160303_19_F4	Tue Apr 05 13:09:34 EDT 2016	Sample#2257274481976279077	f		20x, 63x	Annotator Gen1 MCFO	Masayoshi Ito
R12G03	attP2	57C10PEST_attp18_4stop1	20160303_19_F5	Tue Apr 05 13:09:35 EDT 2016	Sample#2257274483872104485	f		20x, 63x	Annotator Gen1 MCFO	Masayoshi Ito
R12G03	attP2	57C10PEST_attp18_4stop1	20160303_19_F6	Tue Apr 05 13:09:41 EDT 2016	Sample#2257274509079871525	f		20x, 63x	Annotator Gen1 MCFO	Masayoshi Ito
R12G03	attP2	57C10PEST_attp18_4stop1	20160303_19_F7	Fri Mar 11 15:12:41 EST 2016	Sample#2248260866187198562	f		20x	Annotator Gen1 MCFO	Masayoshi Ito
R12G03	attP2	57C10PEST_attp18_4stop1	20160303_19_F8	Fri Mar 11 15:12:41 EST 2016	Sample#2248260866581463138	f		20x	Annotator Gen1 MCFO	Masayoshi Ito
R12G03	attP2	57C10PEST_brp_SNAP_MCFO_X23_0099	20181121_64_H1	Tue Dec 11 12:27:01 EST 2018	Sample#2612418983055327330	f		40x	Gen1 MCFO (40x)	NA
R12G03	attP2	57C10PEST_brp_SNAP_MCFO_X23_0099	20181121_64_H2	Tue Dec 11 12:27:02 EST 2018	Sample#2612418983625752674	f		40x	Gen1 MCFO (40x)	NA
R12G03	attP2	57C10PEST_brp_SNAP_MCFO_X23_0099	20181121_64_H3	Tue Dec 11 12:27:02 EST 2018	Sample#2612418984200372322	f		40x	Gen1 MCFO (40x)	NA
R12G03	attP2	57C10PEST_brp_SNAP_MCFO_X23_0099	20181121_64_H4	Tue Dec 11 12:27:02 EST 2018	Sample#2612418984774991970	f		40x	Gen1 MCFO (40x)	NA
R12G03	attP2	57C10PEST_brp_SNAP_MCFO_X23_0099	20181121_64_H5	Tue Dec 11 12:27:02 EST 2018	Sample#2612418985349611618	f		40x	Gen1 MCFO (40x)	NA
R12G03	attP2	57C10PEST_brp_SNAP_MCFO_X23_0099	20181121_64_H6	Tue Dec 11 12:27:02 EST 2018	Sample#2612418985924231266	f		40x	Gen1 MCFO (40x)	NA
R12G03	attP2	pBPhsFlp2_PEST_brp_SNAP_MCFO_0128	20191022_63_I1	Mon Nov 04 18:58:07 EST 2019	Sample#2731380623225651298	m	40	40x	Gen1 MCFO (40x)	NA
R12G03	attP2	pBPhsFlp2_PEST_brp_SNAP_MCFO_0128	20191022_63_I2	Mon Nov 04 18:58:07 EST 2019	Sample#2731380624144203874	m	40	40x	Gen1 MCFO (40x)	NA
R12G03	attP2	pBPhsFlp2_PEST_brp_SNAP_MCFO_0128	20191022_63_I3	Mon Nov 04 18:58:07 EST 2019	Sample#2731380625075339362	m	40	40x	Gen1 MCFO (40x)	NA
R12G03	attP2	pBPhsFlp2_PEST_brp_SNAP_MCFO_0128	20191022_63_I4	Mon Nov 04 17:18:29 EST 2019	Sample#2731355551664439394	m	40	40x	Gen1 MCFO (40x)	NA
R12G03	attP2	pBPhsFlp2_PEST_brp_SNAP_MCFO_0128	20191022_63_I5	Mon Nov 04 18:58:07 EST 2019	Sample#2731380625930977378	m	40	40x	Gen1 MCFO (40x)	NA
R12G03	attP2	pBPhsFlp2_PEST_brp_SNAP_MCFO_0128	20191022_63_I6	Mon Nov 04 17:18:29 EST 2019	Sample#2731355552515883106	m	40	40x	Gen1 MCFO (40x)	NA
R12G03	attP2	pBPhsFlp2_PEST_brp_SNAP_MCFO_0128	20191022_63_I7	Mon Nov 04 18:58:08 EST 2019	Sample#2731380626795004002	m	40	40x	Gen1 MCFO (40x)	NA
R12G03	attP2	pBPhsFlp2_PEST_brp_SNAP_MCFO_0128	20191022_63_I8	Mon Nov 04 17:18:30 EST 2019	Sample#2731355553354743906	m	40	40x	Gen1 MCFO (40x)	NA
R12G04	attP2	57C10wt_attp8_3stop1	20140328_31_A1	Sun Apr 13 19:38:24 EDT 2014	Sample#1995365908855390306	f		20x	Annotator Gen1 MCFO	Romain Fraconville
R12G04	attP2	57C10wt_attp8_3stop1	20140328_31_A2	Sun Apr 13 19:38:24 EDT 2014	Sample#1995365909585199202	f		20x	Annotator Gen1 MCFO	Romain Fraconville
R12G04	attP2	57C10wt_attp8_3stop1	20140328_31_A3	Sun Apr 13 19:38:25 EDT 2014	Sample#1995365910096904290	f		20x	Annotator Gen1 MCFO	Romain Fraconville
R12G04	attP2	57C10wt_attp8_3stop1	20140328_31_A4	Sun Apr 13 19:38:25 EDT 2014	Sample#1995365910537306210	f		20x	Annotator Gen1 MCFO	Romain Fraconville
R12G04	attP2	57C10wt_attp8_3stop1	20140328_31_A5	Sun Apr 13 19:38:25 EDT 2014	Sample#1995365911028039778	f		20x	Annotator Gen1 MCFO	Romain Fraconville
R12G04	attP2	57C10wt_attp8_3stop1	20140328_31_A6	Sun Apr 13 19:38:25 EDT 2014	Sample#1995365911468441698	f		20x	Annotator Gen1 MCFO	Romain Fraconville
R12G04	attP2	57C10wt_attp8_3stop1	20140328_31_A7	Sun Apr 13 19:38:25 EDT 2014	Sample#1995365911854317666	f		20x	Annotator Gen1 MCFO	Romain Fraconville
R12G04	attP2	57C10wt_attp8_3stop1	20140328_31_A8	Sun Apr 13 19:38:25 EDT 2014	Sample#1995365912298913890	f		20x	Annotator Gen1 MCFO	Romain Fraconville
R12G04	attP2	57C10wt_attp8_3stop1	20140328_31_B1	Sun Apr 13 19:38:25 EDT 2014	Sample#1995365912714149986	f		20x	Annotator Gen1 MCFO	Romain Fraconville
R12G04	attP2	57C10wt_attp8_3stop1	20140328_31_B2	Sun Apr 13 19:38:25 EDT 2014	Sample#1995365913326518370	f		20x	Annotator Gen1 MCFO	Romain Fraconville
R12G04	attP2	57C10wt_attp8_3stop1	20140328_31_B3	Sun Apr 13 19:38:25 EDT 2014	Sample#1995365913850806370	f		20x	Annotator Gen1 MCFO	Romain Fraconville
R12G04	attP2	57C10wt_attp8_3stop1	20140328_31_B4	Sun Apr 13 19:38:26 EDT 2014	Sample#1995365914312179810	f		20x	Annotator Gen1 MCFO	Romain Fraconville
R12G04	attP2	57C10wt_attp8_3stop1	20140328_31_B5	Sun Apr 13 19:38:26 EDT 2014	Sample#1995365914911965282	f		20x	Annotator Gen1 MCFO	Romain Fraconville
R12G04	attP2	57C10wt_attp8_3stop1	20140328_31_B6	Sun Apr 13 19:38:26 EDT 2014	Sample#1995365915352367202	f		20x	Annotator Gen1 MCFO	Romain Fraconville
R12G04	attP2	57C10wt_attp8_3stop1	20140328_31_B7	Sun Apr 13 19:38:26 EDT 2014	Sample#1995365915864072290	f		20x	Annotator Gen1 MCFO	Romain Fraconville
R12G04	attP2	57C10PEST_brp_SNAP_MCFO_X23_0099	20180831_61_J1	Wed Sep 19 13:57:34 EDT 2018	Sample#2582348477279240290	f		40x	Gen1 MCFO (40x)	NA
R12G04	attP2	57C10PEST_brp_SNAP_MCFO_X23_0099	20180831_61_J2	Wed Sep 19 13:57:34 EDT 2018	Sample#2582348477585424482	f		40x	Gen1 MCFO (40x)	NA
R12G04	attP2	57C10PEST_brp_SNAP_MCFO_X23_0099	20180831_61_J3	Wed Sep 19 13:57:34 EDT 2018	Sample#2582348477832888418	f		40x	Gen1 MCFO (40x)	NA
R12G04	attP2	57C10PEST_brp_SNAP_MCFO_X23_0099	20180831_61_J4	Wed Sep 19 13:57:34 EDT 2018	Sample#2582348478130684002	f		40x	Gen1 MCFO (40x)	NA
R12G04	attP2	57C10PEST_brp_SNAP_MCFO_X23_0099	20180831_61_J5	Wed Sep 19 13:57:34 EDT 2018	Sample#2582348478428479586	f		40x	Gen1 MCFO (40x)	NA
R12G04	attP2	57C10PEST_brp_SNAP_MCFO_X23_0099	20180831_61_J6	Wed Sep 19 13:57:35 EDT 2018	Sample#2582348478726275170	f		40x	Gen1 MCFO (40x)	NA
R12G08	attP2	57C10L_brp_SNAP_MCFO_X23_0117	20190514_64_I1	Fri May 24 12:10:36 EDT 2019	Sample#2671831361899200610	f		40x	Gen1 MCFO (40x)	NA
R12G08	attP2	57C10L_brp_SNAP_MCFO_X23_0117	20190514_64_I2	Fri May 24 12:10:36 EDT 2019	Sample#2671831362280882274	f		40x	Gen1 MCFO (40x)	NA
R12G08	attP2	57C10L_brp_SNAP_MCFO_X23_0117	20190514_64_I3	Fri May 24 12:10:37 EDT 2019	Sample#2671831362670952546	f		40x	Gen1 MCFO (40x)	NA
R12G08	attP2	57C10L_brp_SNAP_MCFO_X23_0117	20190514_64_I5	Fri May 24 12:10:37 EDT 2019	Sample#2671831363056828514	f		40x	Gen1 MCFO (40x)	NA
R12G08	attP2	57C10L_brp_SNAP_MCFO_X23_0117	20190514_64_I6	Fri May 24 12:10:37 EDT 2019	Sample#2671831363434315874	f		40x	Gen1 MCFO (40x)	NA
R12G08	attP2	57C10PEST_brp_SNAP_MCFO_X23_0099	20181113_61_I1	Tue Nov 20 17:21:52 EST 2018	Sample#2604883035434254434	f		40x	Gen1 MCFO (40x)	NA
R12G08	attP2	57C10PEST_brp_SNAP_MCFO_X23_0099	20181113_61_I4	Tue Nov 20 17:21:52 EST 2018	Sample#2604883035924988002	f		40x	Gen1 MCFO (40x)	NA
R12G08	attP2	57C10PEST_brp_SNAP_MCFO_X23_0099	20181113_61_I5	Tue Nov 20 17:21:52 EST 2018	Sample#2604883036419915874	f		40x	Gen1 MCFO (40x)	NA
R12G08	attP2	57C10PEST_brp_SNAP_MCFO_X23_0099	20181113_61_I6	Tue Nov 20 17:21:52 EST 2018	Sample#2604883037019701346	f		40x	Gen1 MCFO (40x)	NA
R12G08	attP2	pBPhsFlp2_PEST_brp_SNAP_MCFO_0128	20190716_63_D1	Mon Aug 05 12:10:10 EDT 2019	Sample#2698285566134321250	f	40	40x	Gen1 MCFO (40x)	NA
R12G08	attP2	pBPhsFlp2_PEST_brp_SNAP_MCFO_0128	20190716_63_D2	Mon Aug 05 12:10:10 EDT 2019	Sample#2698285566604083298	f	40	40x	Gen1 MCFO (40x)	NA
R12G08	attP2	pBPhsFlp2_PEST_brp_SNAP_MCFO_0128	20190716_63_D3	Mon Aug 05 12:10:10 EDT 2019	Sample#2698285567015125090	f	40	40x	Gen1 MCFO (40x)	NA
R12G08	attP2	pBPhsFlp2_PEST_brp_SNAP_MCFO_0128	20190716_63_D5	Mon Aug 05 12:10:10 EDT 2019	Sample#2698285567430361186	f	40	40x	Gen1 MCFO (40x)	NA
R12G08	attP2	pBPhsFlp2_PEST_brp_SNAP_MCFO_0128	20190716_63_D6	Mon Aug 05 12:10:11 EDT 2019	Sample#2698285567845597282	f	40	40x	Gen1 MCFO (40x)	NA
R12G09	attP2	57C10PEST_attp18_4stop1	20140501_21_E1	Tue May 06 08:22:26 EDT 2014	Sample#2003530718109499490	f		20x	Annotator Gen1 MCFO	Aljoscha Nern
R12G09	attP2	57C10PEST_attp18_4stop1	20140501_21_E2	Tue May 06 08:22:27 EDT 2014	Sample#2003530719611060322	f		20x	Annotator Gen1 MCFO	Aljoscha Nern
R12G09	attP2	57C10PEST_attp18_4stop1	20140501_21_E3	Tue May 06 08:22:27 EDT 2014	Sample#2003530720479281250	f		20x	Annotator Gen1 MCFO	Aljoscha Nern
R12G09	attP2	57C10PEST_attp18_4stop1	20140501_21_E4	Tue May 06 08:22:27 EDT 2014	Sample#2003530721561411682	f		20x	Annotator Gen1 MCFO	Aljoscha Nern
R12G09	attP2	57C10PEST_attp18_4stop1	20140501_21_E5	Tue May 06 08:22:28 EDT 2014	Sample#2003530722551267426	f		20x	Annotator Gen1 MCFO	Aljoscha Nern
R12G09	attP2	57C10PEST_attp18_4stop1	20140501_21_E6	Tue May 06 08:22:28 EDT 2014	Sample#2003530723411099746	f		20x	Annotator Gen1 MCFO	Aljoscha Nern
R12G09	attP2	57C10PEST_attp18_4stop1	20140501_21_E7	Tue May 06 08:22:28 EDT 2014	Sample#2003530724451287138	f		20x	Annotator Gen1 MCFO	Aljoscha Nern
R12G09	attP2	57C10PEST_attp18_4stop1	20140505_32_D1	Sun May 11 16:19:38 EDT 2014	Sample#2005462748716072967	f		20x	Annotator Gen1 MCFO	Aljoscha Nern
R12G09	attP2	57C10PEST_attp18_4stop1	20140505_32_D2	Sun May 11 16:19:39 EDT 2014	Sample#2005462750075027463	f		20x	Annotator Gen1 MCFO	Aljoscha Nern
R12G09	attP2	57C10PEST_attp18_4stop1	20140505_32_D3	Sun May 11 16:19:39 EDT 2014	Sample#2005462751337512967	f		20x	Annotator Gen1 MCFO	Aljoscha Nern
R12G09	attP2	57C10PEST_attp18_4stop1	20140505_32_D4	Sun May 11 16:19:39 EDT 2014	Sample#2005462752721633287	f		20x	Annotator Gen1 MCFO	Aljoscha Nern
R12G09	attP2	57C10PEST_attp18_4stop1	20140505_32_D5	Sun May 11 16:19:40 EDT 2014	Sample#2005462753929592839	f		20x	Annotator Gen1 MCFO	Aljoscha Nern
R12G09	attP2	57C10PEST_attp18_4stop1	20140505_32_D6	Sun May 11 16:19:40 EDT 2014	Sample#2005462755296935943	f		20x	Annotator Gen1 MCFO	Aljoscha Nern
R12G09	attP2	57C10PEST_attp18_4stop1	20140505_32_D7	Sun May 11 16:19:40 EDT 2014	Sample#2005462756685250567	f		20x	Annotator Gen1 MCFO	Aljoscha Nern
R12G09	attP2	57C10PEST_attp18_4stop1	20140505_32_D8	Sun May 11 16:19:41 EDT 2014	Sample#2005462758044205063	f		20x	Annotator Gen1 MCFO	Aljoscha Nern
R12G09	attP2	57C10wt_attp8_3stop1	20130606_3_G3	Thu Apr 24 20:10:10 EDT 2014	Sample#1999360168449540194	f		20x	Annotator Gen1 MCFO	Tanya Wolff
R12G09	attP2	57C10wt_attp8_3stop1	20130606_3_G4	Thu Apr 24 20:10:10 EDT 2014	Sample#1999360169191932002	f		20x	Annotator Gen1 MCFO	Tanya Wolff
R12G09	attP2	57C10wt_attp8_3stop1	20130606_3_G5	Thu Apr 24 20:10:10 EDT 2014	Sample#1999360169925935202	f		20x	Annotator Gen1 MCFO	Tanya Wolff
R12G09	attP2	57C10wt_attp8_3stop1	20130606_3_G6	Thu Apr 24 20:10:11 EDT 2014	Sample#1999360170680909922	f		20x	Annotator Gen1 MCFO	Tanya Wolff
R12G09	attP2	57C10wt_attp8_3stop1	20130606_3_H2	Thu Apr 24 20:10:11 EDT 2014	Sample#1999360171574296674	f		20x	Annotator Gen1 MCFO	Tanya Wolff
R12G09	attP2	57C10wt_attp8_3stop1	20130606_3_H3	Thu Apr 24 20:10:11 EDT 2014	Sample#1999360172216025186	f		20x	Annotator Gen1 MCFO	Tanya Wolff
R12G09	attP2	57C10wt_attp8_3stop1	20130612_2_E1	Mon Jan 18 10:44:07 EST 2016	Sample#2228986723168157794	f	15	20x, 63x	Annotator Gen1 MCFO	Tanya Wolff
R12G09	attP2	57C10wt_attp8_3stop1	20130612_2_E2	Tue Apr 28 14:21:24 EDT 2015	Sample#2132993521861263458	f	15	20x, 63x	Annotator Gen1 MCFO	Tanya Wolff
R12G09	attP2	57C10PEST_brp_SNAP_MCFO_X23_0099	20180831_62_A1	Thu Sep 13 18:20:55 EDT 2018	Sample#2580240423066796130	f		40x	Gen1 MCFO (40x)	NA
R12G09	attP2	57C10PEST_brp_SNAP_MCFO_X23_0099	20180831_62_A2	Thu Sep 13 18:20:55 EDT 2018	Sample#2580240423364591714	f		40x	Gen1 MCFO (40x)	NA
R12G09	attP2	57C10PEST_brp_SNAP_MCFO_X23_0099	20180831_62_A3	Thu Sep 13 18:20:55 EDT 2018	Sample#2580240423649804386	f		40x	Gen1 MCFO (40x)	NA
R12G09	attP2	57C10PEST_brp_SNAP_MCFO_X23_0099	20180831_62_A4	Thu Sep 13 18:20:55 EDT 2018	Sample#2580240423943405666	f		40x	Gen1 MCFO (40x)	NA
R12G09	attP2	57C10PEST_brp_SNAP_MCFO_X23_0099	20180831_62_A5	Thu Sep 13 18:20:55 EDT 2018	Sample#2580240424232812642	f		40x	Gen1 MCFO (40x)	NA
R12G09	attP2	57C10PEST_brp_SNAP_MCFO_X23_0099	20180831_62_A6	Thu Sep 13 18:20:55 EDT 2018	Sample#2580240424513831010	f		40x	Gen1 MCFO (40x)	NA
R12G10	attP2	57C10PEST_attp18_4stop1	20160408_22_G2	Fri Apr 15 07:33:51 EDT 2016	Sample#2260813874234130530	f		20x	Annotator Gen1 MCFO	Jens Goldammer
R12G10	attP2	57C10PEST_attp18_4stop1	20160408_22_G3	Thu May 19 07:52:16 EDT 2016	Sample#2273139692570411082	f		20x, 63x	Annotator Gen1 MCFO	Jens Goldammer
R12G10	attP2	57C10PEST_attp18_4stop1	20160408_22_G4	Thu May 19 07:52:32 EDT 2016	Sample#2273139760660742218	f		20x, 63x	Annotator Gen1 MCFO	Jens Goldammer
R12G10	attP2	57C10PEST_attp18_4stop1	20160408_22_G7	Thu May 19 07:52:46 EDT 2016	Sample#2273139818168844362	f		20x, 63x	Annotator Gen1 MCFO	Jens Goldammer
R12G10	attP2	57C10PEST_attp18_4stop1	20160408_22_G8	Thu May 19 07:52:58 EDT 2016	Sample#2273139870861885514	f		20x, 63x	Annotator Gen1 MCFO	Jens Goldammer
R12G12	attP2	57C10PEST_brp_SNAP_MCFO_X23_0099	20181121_64_I2	Tue Dec 11 12:27:02 EST 2018	Sample#2612418986498850914	f		40x	Gen1 MCFO (40x)	NA
R12G12	attP2	pBPhsFlp2_PEST_brp_SNAP_MCFO_0128	20190719_61_A1	Mon Aug 05 14:43:37 EDT 2019	Sample#2698324183783309410	m	40	40x	Gen1 MCFO (40x)	NA
R12G12	attP2	pBPhsFlp2_PEST_brp_SNAP_MCFO_0128	20190719_61_A2	Mon Aug 05 14:43:37 EDT 2019	Sample#2698324184248877154	m	40	40x	Gen1 MCFO (40x)	NA
R12H02	attP2	57C10PEST_attp18_4stop1	20160303_19_E1	Fri Mar 11 15:12:39 EST 2016	Sample#2248260860587802722	f		20x	Annotator Gen1 MCFO	Masayoshi Ito
R12H02	attP2	57C10PEST_attp18_4stop1	20160303_19_E2	Fri Mar 11 15:12:39 EST 2016	Sample#2248260860986261602	f		20x	Annotator Gen1 MCFO	Masayoshi Ito
R12H02	attP2	57C10PEST_attp18_4stop1	20160303_19_E3	Thu Mar 31 07:48:30 EDT 2016	Sample#2255381741474676773	f		20x, 63x	Annotator Gen1 MCFO	Masayoshi Ito
R12H02	attP2	57C10PEST_attp18_4stop1	20160303_19_E4	Thu Mar 31 07:48:30 EDT 2016	Sample#2255381744167419941	f		20x, 63x	Annotator Gen1 MCFO	Masayoshi Ito
R12H02	attP2	57C10PEST_attp18_4stop1	20160303_19_E5	Thu Mar 31 07:48:35 EDT 2016	Sample#2255381765503844389	f		20x, 63x	Annotator Gen1 MCFO	Masayoshi Ito
R12H02	attP2	57C10PEST_attp18_4stop1	20160303_19_E6	Thu Mar 31 07:48:39 EDT 2016	Sample#2255381781526085669	f		20x, 63x	Annotator Gen1 MCFO	Masayoshi Ito
R12H02	attP2	57C10PEST_attp18_4stop1	20160303_19_E7	Thu Mar 31 07:48:42 EDT 2016	Sample#2255381794280964133	f		20x, 63x	Annotator Gen1 MCFO	Masayoshi Ito
R12H02	attP2	57C10PEST_attp18_4stop1	20160303_19_E8	Fri Mar 11 15:12:40 EST 2016	Sample#2248260863389597794	f		20x	Annotator Gen1 MCFO	Masayoshi Ito
R12H03	attP2	57C10PEST_attp18_4stop1	20170602_22_F1	Fri Jun 09 14:36:38 EDT 2017	Sample#2413123176725741666	f		20x	Annotator Gen1 MCFO	Masayoshi Ito
R12H03	attP2	57C10PEST_attp18_4stop1	20170602_22_F2	Fri Jun 09 14:36:39 EDT 2017	Sample#2413123176826404962	f		20x	Annotator Gen1 MCFO	Masayoshi Ito
R12H03	attP2	57C10PEST_attp18_4stop1	20170602_22_F3	Fri Jun 09 14:36:39 EDT 2017	Sample#2413123176922873954	f		20x	Annotator Gen1 MCFO	Masayoshi Ito
R12H03	attP2	57C10PEST_attp18_4stop1	20170602_22_F4	Fri Jun 09 14:36:39 EDT 2017	Sample#2413123177019342946	f		20x	Annotator Gen1 MCFO	Masayoshi Ito
R12H03	attP2	57C10PEST_attp18_4stop1	20170602_22_F5	Fri Jun 09 14:36:39 EDT 2017	Sample#2413123177120006242	f		20x, 63x	Annotator Gen1 MCFO	Masayoshi Ito
R12H03	attP2	57C10PEST_attp18_4stop1	20170602_22_F6	Fri Jun 09 14:36:39 EDT 2017	Sample#2413123177216475234	f		20x	Annotator Gen1 MCFO	Masayoshi Ito
R12H03	attP2	57C10PEST_attp18_4stop1	20170602_22_F7	Fri Jun 09 14:36:39 EDT 2017	Sample#2413123177312944226	f		20x	Annotator Gen1 MCFO	Masayoshi Ito
R12H03	attP2	57C10PEST_attp18_4stop1	20170602_22_F8	Fri Jun 09 14:36:39 EDT 2017	Sample#2413123177409413218	f		20x, 63x	Annotator Gen1 MCFO	Masayoshi Ito
R12H08	attP2	57C10PEST_attp18_4stop1	20170217_25_A1	Tue Feb 28 12:24:46 EST 2017	Sample#2376503914515136610	f	15	20x, 63x	Annotator Gen1 MCFO	Jens Goldammer
R12H08	attP2	57C10PEST_attp18_4stop1	20170217_25_A2	Tue Feb 28 12:24:46 EST 2017	Sample#2376503914695491682	f	15	20x, 63x	Annotator Gen1 MCFO	Jens Goldammer
R12H08	attP2	57C10PEST_attp18_4stop1	20170217_25_A3	Tue Feb 28 12:24:46 EST 2017	Sample#2376503914867458146	f	15	20x	Annotator Gen1 MCFO	Jens Goldammer
R12H08	attP2	57C10PEST_attp18_4stop1	20170217_25_A4	Tue Feb 28 12:24:46 EST 2017	Sample#2376503915039424610	f	15	20x, 63x	Annotator Gen1 MCFO	Jens Goldammer
R12H08	attP2	57C10PEST_attp18_4stop1	20170217_25_A5	Tue Feb 28 12:24:46 EST 2017	Sample#2376503915211391074	f	15	20x	Annotator Gen1 MCFO	Jens Goldammer
R12H08	attP2	57C10PEST_attp18_4stop1	20170217_25_A6	Tue Feb 28 12:24:46 EST 2017	Sample#2376503915379163234	f	15	20x, 63x	Annotator Gen1 MCFO	Jens Goldammer
R12H08	attP2	57C10PEST_attp18_4stop1	20170217_25_A7	Tue Feb 28 12:24:46 EST 2017	Sample#2376503915546935394	f	15	20x	Annotator Gen1 MCFO	Jens Goldammer
R12H08	attP2	57C10PEST_attp18_4stop1	20170217_25_A8	Tue Feb 28 12:24:46 EST 2017	Sample#2376503915718901858	f	15	20x	Annotator Gen1 MCFO	Jens Goldammer
R12H08	attP2	57C10PEST_attp18_4stop1	20170217_25_B1	Tue Feb 28 12:24:46 EST 2017	Sample#2376503915890868322	f	15	20x	Annotator Gen1 MCFO	Jens Goldammer
R12H12	attP2	57C10PEST_attp18_4stop1	20170602_24_G1	Mon Jun 19 11:53:04 EDT 2017	Sample#2416705888539639906	f		20x, 63x	Annotator Gen1 MCFO	Masayoshi Ito
R12H12	attP2	57C10PEST_attp18_4stop1	20170602_24_G2	Mon Jun 19 11:53:04 EDT 2017	Sample#2416705888640303202	f		20x	Annotator Gen1 MCFO	Masayoshi Ito
R12H12	attP2	57C10PEST_attp18_4stop1	20170602_24_G3	Mon Jun 19 11:53:04 EDT 2017	Sample#2416705888740966498	f		20x	Annotator Gen1 MCFO	Masayoshi Ito
R12H12	attP2	57C10PEST_attp18_4stop1	20170602_24_G4	Mon Jun 19 11:53:04 EDT 2017	Sample#2416705888841629794	f		20x	Annotator Gen1 MCFO	Masayoshi Ito
R12H12	attP2	57C10PEST_attp18_4stop1	20170602_24_G5	Mon Jun 19 11:53:04 EDT 2017	Sample#2416705888946487394	f		20x	Annotator Gen1 MCFO	Masayoshi Ito
R12H12	attP2	57C10PEST_attp18_4stop1	20170602_24_G6	Mon Jun 19 11:53:04 EDT 2017	Sample#2416705889047150690	f		20x	Annotator Gen1 MCFO	Masayoshi Ito
R12H12	attP2	57C10PEST_attp18_4stop1	20170602_24_G7	Mon Jun 19 11:53:04 EDT 2017	Sample#2416705889147813986	f		20x, 63x	Annotator Gen1 MCFO	Masayoshi Ito
R12H12	attP2	57C10PEST_attp18_4stop1	20170602_24_G8	Mon Jun 19 11:53:04 EDT 2017	Sample#2416705889248477282	f		20x	Annotator Gen1 MCFO	Masayoshi Ito
R12H12	attP2	57C10PEST_brp_SNAP_MCFO_X23_0099	20181121_64_J1	Tue Dec 11 12:27:02 EST 2018	Sample#2612418987014750306	f		40x	Gen1 MCFO (40x)	NA
R12H12	attP2	57C10PEST_brp_SNAP_MCFO_X23_0099	20181121_64_J2	Tue Dec 11 12:27:03 EST 2018	Sample#2612418987606147170	f		40x	Gen1 MCFO (40x)	NA
R12H12	attP2	57C10PEST_brp_SNAP_MCFO_X23_0099	20181121_64_J3	Tue Mar 12 13:25:54 EDT 2019	Sample#2645395996774760546	f		40x	Gen1 MCFO (40x)	NA
R12H12	attP2	57C10PEST_brp_SNAP_MCFO_X23_0099	20181121_64_J4	Tue Mar 12 13:25:54 EDT 2019	Sample#2645395997420683362	f		40x	Gen1 MCFO (40x)	NA
R12H12	attP2	57C10PEST_brp_SNAP_MCFO_X23_0099	20181121_64_J5	Tue Mar 12 13:25:55 EDT 2019	Sample#2645395998028857442	f		40x	Gen1 MCFO (40x)	NA
R12H12	attP2	57C10PEST_brp_SNAP_MCFO_X23_0099	20181121_64_J6	Tue Mar 12 13:25:55 EDT 2019	Sample#2645395998674780258	f		40x	Gen1 MCFO (40x)	NA
R12H12	attP2	pBPhsFlp2_PEST_brp_SNAP_MCFO_0128	20190809_62_F1	Thu Aug 22 14:23:14 EDT 2019	Sample#2704479647353012322	m	13	40x	Gen1 MCFO (40x)	NA
R12H12	attP2	pBPhsFlp2_PEST_brp_SNAP_MCFO_0128	20190809_62_F2	Thu Aug 29 11:59:03 EDT 2019	Sample#2706980074720067682	m	13	40x	Gen1 MCFO (40x)	NA
R12H12	attP2	pBPhsFlp2_PEST_brp_SNAP_MCFO_0128	20190809_62_F3	Thu Aug 29 11:59:03 EDT 2019	Sample#2706980075198218338	m	13	40x	Gen1 MCFO (40x)	NA
R12H12	attP2	pBPhsFlp2_PEST_brp_SNAP_MCFO_0128	20190809_62_F4	Thu Aug 29 11:59:03 EDT 2019	Sample#2706980075659591778	m	13	40x	Gen1 MCFO (40x)	NA
R12H12	attP2	pBPhsFlp2_PEST_brp_SNAP_MCFO_0128	20190809_62_F5	Thu Aug 29 11:59:03 EDT 2019	Sample#2706980076112576610	m	13	40x	Gen1 MCFO (40x)	NA
R12H12	attP2	pBPhsFlp2_PEST_brp_SNAP_MCFO_0128	20190809_62_F6	Thu Aug 29 11:59:03 EDT 2019	Sample#2706980076511035490	m	13	40x	Gen1 MCFO (40x)	NA
R12H12	attP2	pBPhsFlp2_PEST_brp_SNAP_MCFO_0128	20190809_62_G1	Thu Aug 29 11:59:03 EDT 2019	Sample#2706980076909494370	m	13	40x	Gen1 MCFO (40x)	NA
R12H12	attP2	pBPhsFlp2_PEST_brp_SNAP_MCFO_0128	20190809_62_G2	Thu Aug 29 11:59:03 EDT 2019	Sample#2706980077307953250	m	13	40x	Gen1 MCFO (40x)	NA
R12H12	attP2	pBPhsFlp2_PEST_brp_SNAP_MCFO_0128	20190809_62_G3	Thu Aug 29 11:59:03 EDT 2019	Sample#2706980077702217826	m	13	40x	Gen1 MCFO (40x)	NA
R13A08	attP2	57C10PEST_attp18_4stop1	20140501_22_B1	Tue May 06 08:22:35 EDT 2014	Sample#2003530751697485922	f		20x	Annotator Gen1 MCFO	Aljoscha Nern
R13A08	attP2	57C10PEST_attp18_4stop1	20140501_22_B2	Tue May 06 08:22:39 EDT 2014	Sample#2003530770777374818	f		20x	Annotator Gen1 MCFO	Aljoscha Nern
R13A08	attP2	57C10PEST_attp18_4stop1	20140501_22_B3	Tue May 06 08:22:42 EDT 2014	Sample#2003530781099556962	f		20x	Annotator Gen1 MCFO	Aljoscha Nern
R13A08	attP2	57C10PEST_attp18_4stop1	20140501_22_B5	Tue May 06 08:22:42 EDT 2014	Sample#2003530782211047522	f		20x	Annotator Gen1 MCFO	Aljoscha Nern
R13A08	attP2	57C10PEST_attp18_4stop1	20140501_22_B6	Tue May 06 08:22:42 EDT 2014	Sample#2003530783825854562	f		20x	Annotator Gen1 MCFO	Aljoscha Nern
R13A08	attP2	57C10PEST_attp18_4stop1	20140501_22_B7	Tue May 06 08:22:42 EDT 2014	Sample#2003530785209974882	f		20x	Annotator Gen1 MCFO	Aljoscha Nern
R13A08	attP2	57C10PEST_attp18_4stop1	20140501_22_B7	Thu Feb 12 21:22:45 EST 2015	Sample#2105935567706390626	f		63x	Annotator Gen1 MCFO	Aljoscha Nern
R13A08	attP2	57C10PEST_attp18_4stop1	20140501_22_B8	Tue May 06 08:22:43 EDT 2014	Sample#2003530786837364834	f		20x	Annotator Gen1 MCFO	Aljoscha Nern
R13A08	attP2	57C10PEST_attp18_4stop1	20151008_20_G1	Thu Oct 15 15:24:35 EDT 2015	Sample#2194615358164303970	f		20x	Annotator Gen1 MCFO	Jens Goldammer
R13A08	attP2	57C10PEST_attp18_4stop1	20151008_20_G2	Thu Oct 15 15:24:35 EDT 2015	Sample#2194615358462099554	f		20x	Annotator Gen1 MCFO	Jens Goldammer
R13A08	attP2	57C10PEST_attp18_4stop1	20151008_20_G3	Thu Oct 15 15:24:35 EDT 2015	Sample#2194615359036719202	f		20x	Annotator Gen1 MCFO	Jens Goldammer
R13A08	attP2	57C10PEST_attp18_4stop1	20151008_20_G4	Thu Oct 15 15:24:35 EDT 2015	Sample#2194615359334514786	f		20x	Annotator Gen1 MCFO	Jens Goldammer
R13A08	attP2	57C10PEST_attp18_4stop1	20151008_20_G5	Thu Oct 15 15:24:35 EDT 2015	Sample#2194615359951077474	f		20x	Annotator Gen1 MCFO	Jens Goldammer
R13A08	attP2	57C10PEST_attp18_4stop1	20151008_20_G6	Thu Oct 15 15:24:35 EDT 2015	Sample#2194615360244678754	f		20x	Annotator Gen1 MCFO	Jens Goldammer
R13A08	attP2	57C10PEST_attp18_4stop1	20151008_20_G7	Thu Oct 15 15:24:36 EDT 2015	Sample#2194615360861241442	f		20x	Annotator Gen1 MCFO	Jens Goldammer
R13A08	attP2	57C10PEST_attp18_4stop1	20151008_20_G8	Thu Oct 15 15:24:36 EDT 2015	Sample#2194615361465221218	f		20x	Annotator Gen1 MCFO	Jens Goldammer
R13A08	attP2	57C10PEST_attp18_4stop1	20151008_20_H1	Thu Oct 15 15:24:36 EDT 2015	Sample#2194615362065006690	f		20x	Annotator Gen1 MCFO	Jens Goldammer
R13A08	attP2	57C10PEST_attp18_4stop1	20151008_20_H2	Thu Oct 15 15:24:36 EDT 2015	Sample#2194615362350219362	f		20x	Annotator Gen1 MCFO	Jens Goldammer
R13A08	attP2	57C10PEST_brp_SNAP_MCFO_X23_0099	20180831_62_B1	Thu Sep 13 18:20:55 EDT 2018	Sample#2580240424828403810	f		40x	Gen1 MCFO (40x)	NA
R13A08	attP2	57C10PEST_brp_SNAP_MCFO_X23_0099	20180831_62_B2	Thu Sep 13 18:20:55 EDT 2018	Sample#2580240425113616482	f		40x	Gen1 MCFO (40x)	NA
R13A08	attP2	57C10PEST_brp_SNAP_MCFO_X23_0099	20180831_62_B3	Thu Sep 13 18:20:55 EDT 2018	Sample#2580240425398829154	f		40x	Gen1 MCFO (40x)	NA
R13A08	attP2	57C10PEST_brp_SNAP_MCFO_X23_0099	20180831_62_B4	Thu Sep 13 18:20:56 EDT 2018	Sample#2580240425684041826	f		40x	Gen1 MCFO (40x)	NA
R13A08	attP2	57C10PEST_brp_SNAP_MCFO_X23_0099	20180831_62_B5	Thu Sep 13 18:20:56 EDT 2018	Sample#2580240425969254498	f		40x	Gen1 MCFO (40x)	NA
R13A08	attP2	57C10PEST_brp_SNAP_MCFO_X23_0099	20180831_62_B6	Thu Sep 13 18:20:56 EDT 2018	Sample#2580240426250272866	f		40x	Gen1 MCFO (40x)	NA
R13A08	attP2	57C10PEST_brp_SNAP_MCFO_X23_0099	20180831_62_C1	Thu Sep 13 18:20:56 EDT 2018	Sample#2580240426476765282	f		40x	Gen1 MCFO (40x)	NA
R13B01	attP2	57C10L_brp_SNAP_MCFO_X23_0117	20190614_62_J2	Wed Jul 31 13:53:39 EDT 2019	Sample#2696499669491515490	m		40x	Gen1 MCFO (40x)	NA
R13B01	attP2	57C10L_brp_SNAP_MCFO_X23_0117	20190614_62_J3	Wed Jul 31 13:53:44 EDT 2019	Sample#2696499688370077794	m		40x	Gen1 MCFO (40x)	NA
R13B01	attP2	57C10L_brp_SNAP_MCFO_X23_0117	20190614_62_J4	Wed Jul 31 13:53:53 EDT 2019	Sample#2696499725477085282	m		40x	Gen1 MCFO (40x)	NA
R13B01	attP2	57C10L_brp_SNAP_MCFO_X23_0117	20190614_62_J5	Wed Jul 31 13:53:57 EDT 2019	Sample#2696499742451433570	m		40x	Gen1 MCFO (40x)	NA
R13B01	attP2	57C10L_brp_SNAP_MCFO_X23_0117	20190614_62_J6	Wed Jul 31 13:53:57 EDT 2019	Sample#2696499742929584226	m		40x	Gen1 MCFO (40x)	NA
R13B01	attP2	pBPhsFlp2_PEST_brp_SNAP_MCFO_0128	20190702_65_B1	Wed Jul 24 12:49:24 EDT 2019	Sample#2693946782525685858	f	40	40x	Gen1 MCFO (40x)	NA
R13B01	attP2	pBPhsFlp2_PEST_brp_SNAP_MCFO_0128	20190702_65_B2	Wed Jul 24 12:49:24 EDT 2019	Sample#2693946782966087778	f	40	40x	Gen1 MCFO (40x)	NA
R13B01	attP2	pBPhsFlp2_PEST_brp_SNAP_MCFO_0128	20190702_65_B3	Wed Jul 24 12:49:24 EDT 2019	Sample#2693946783360352354	f	40	40x	Gen1 MCFO (40x)	NA
R13B01	attP2	pBPhsFlp2_PEST_brp_SNAP_MCFO_0128	20190702_65_B4	Wed Jul 24 12:49:24 EDT 2019	Sample#2693946783813337186	f	40	40x	Gen1 MCFO (40x)	NA
R13B01	attP2	pBPhsFlp2_PEST_brp_SNAP_MCFO_0128	20190702_65_B5	Wed Jul 24 12:49:24 EDT 2019	Sample#2693946784211796066	f	40	40x	Gen1 MCFO (40x)	NA
R13B01	attP2	pBPhsFlp2_PEST_brp_SNAP_MCFO_0128	20190702_65_B6	Wed Jul 24 12:49:24 EDT 2019	Sample#2693946784606060642	f	40	40x	Gen1 MCFO (40x)	NA
R13B01	attP2	pBPhsFlp2_PEST_brp_SNAP_MCFO_0128	20190702_65_C1	Wed Jul 24 12:49:24 EDT 2019	Sample#2693946785000325218	f	40	40x	Gen1 MCFO (40x)	NA
R13B05	attP2	57C10PEST_brp_SNAP_MCFO_X23_0099	20181121_65_A1	Fri Dec 14 16:42:30 EST 2018	Sample#2613570437988221026	f		40x	Gen1 MCFO (40x)	NA
R13B05	attP2	57C10PEST_brp_SNAP_MCFO_X23_0099	20181121_65_A2	Fri Dec 14 16:42:30 EST 2018	Sample#2613570438588006498	f		40x	Gen1 MCFO (40x)	NA
R13B05	attP2	57C10PEST_brp_SNAP_MCFO_X23_0099	20181121_65_A3	Fri Dec 14 16:42:30 EST 2018	Sample#2613570439175209058	f		40x	Gen1 MCFO (40x)	NA
R13B05	attP2	57C10PEST_brp_SNAP_MCFO_X23_0099	20181121_65_A4	Fri Dec 14 16:42:30 EST 2018	Sample#2613570439783383138	f		40x	Gen1 MCFO (40x)	NA
R13B05	attP2	57C10PEST_brp_SNAP_MCFO_X23_0099	20181121_65_A5	Fri Dec 14 16:42:30 EST 2018	Sample#2613570440374780002	f		40x	Gen1 MCFO (40x)	NA
R13B05	attP2	57C10PEST_brp_SNAP_MCFO_X23_0099	20181121_65_A6	Fri Dec 14 16:42:30 EST 2018	Sample#2613570440961982562	f		40x	Gen1 MCFO (40x)	NA
R13B05	attP2	pBPhsFlp2_PEST_brp_SNAP_MCFO_0128	20191015_61_B1	Fri Oct 25 16:39:28 EDT 2019	Sample#2727706755453681762	m	13	40x	Gen1 MCFO (40x)	NA
R13B05	attP2	pBPhsFlp2_PEST_brp_SNAP_MCFO_0128	20191015_61_B10	Fri Oct 25 16:39:30 EDT 2019	Sample#2727706763053760610	m	13	40x	Gen1 MCFO (40x)	NA
R13B05	attP2	pBPhsFlp2_PEST_brp_SNAP_MCFO_0128	20191015_61_B2	Fri Oct 25 16:39:29 EDT 2019	Sample#2727706756338679906	m	13	40x	Gen1 MCFO (40x)	NA
R13B05	attP2	pBPhsFlp2_PEST_brp_SNAP_MCFO_0128	20191015_61_B4	Fri Oct 25 16:39:29 EDT 2019	Sample#2727706758121259106	m	13	40x	Gen1 MCFO (40x)	NA
R13B05	attP2	pBPhsFlp2_PEST_brp_SNAP_MCFO_0128	20191015_61_B5	Fri Oct 25 16:39:29 EDT 2019	Sample#2727706758934954082	m	13	40x	Gen1 MCFO (40x)	NA
R13B05	attP2	pBPhsFlp2_PEST_brp_SNAP_MCFO_0128	20191015_61_B6	Fri Oct 25 16:39:29 EDT 2019	Sample#2727706759757037666	m	13	40x	Gen1 MCFO (40x)	NA
R13B05	attP2	pBPhsFlp2_PEST_brp_SNAP_MCFO_0128	20191015_61_B7	Fri Oct 25 16:39:30 EDT 2019	Sample#2727706760570732642	m	13	40x	Gen1 MCFO (40x)	NA
R13B05	attP2	pBPhsFlp2_PEST_brp_SNAP_MCFO_0128	20191015_61_B8	Fri Oct 25 16:39:30 EDT 2019	Sample#2727706761397010530	m	13	40x	Gen1 MCFO (40x)	NA
R13B05	attP2	pBPhsFlp2_PEST_brp_SNAP_MCFO_0128	20191015_61_B9	Fri Oct 25 16:39:30 EDT 2019	Sample#2727706762223288418	m	13	40x	Gen1 MCFO (40x)	NA
R13B06	attP2	57C10PEST_brp_SNAP_MCFO_X23_0099	20181121_65_B1	Fri Dec 14 16:42:31 EST 2018	Sample#2613570441557573730	f		40x	Gen1 MCFO (40x)	NA
R13B06	attP2	57C10PEST_brp_SNAP_MCFO_X23_0099	20181121_65_B2	Fri Dec 14 16:42:31 EST 2018	Sample#2613570442140581986	f		40x	Gen1 MCFO (40x)	NA
R13B06	attP2	57C10PEST_brp_SNAP_MCFO_X23_0099	20181121_65_B3	Fri Dec 14 16:42:31 EST 2018	Sample#2613570442723590242	f		40x	Gen1 MCFO (40x)	NA
R13B06	attP2	57C10PEST_brp_SNAP_MCFO_X23_0099	20181121_65_B4	Fri Dec 14 16:42:31 EST 2018	Sample#2613570443323375714	f		40x	Gen1 MCFO (40x)	NA
R13B06	attP2	57C10PEST_brp_SNAP_MCFO_X23_0099	20181121_65_B5	Fri Dec 14 16:42:31 EST 2018	Sample#2613570443960909922	f		40x	Gen1 MCFO (40x)	NA
R13B06	attP2	pBPhsFlp2_PEST_brp_SNAP_MCFO_0128	20191022_63_J1	Mon Nov 04 18:58:08 EST 2019	Sample#2731380627675807842	m	40	40x	Gen1 MCFO (40x)	NA
R13B06	attP2	pBPhsFlp2_PEST_brp_SNAP_MCFO_0128	20191022_63_J2	Mon Nov 04 18:58:08 EST 2019	Sample#2731380628611137634	m	40	40x	Gen1 MCFO (40x)	NA
R13B06	attP2	pBPhsFlp2_PEST_brp_SNAP_MCFO_0128	20191022_63_J3	Mon Nov 04 18:58:08 EST 2019	Sample#2731380629533884514	m	40	40x	Gen1 MCFO (40x)	NA
R13B06	attP2	pBPhsFlp2_PEST_brp_SNAP_MCFO_0128	20191022_63_J4	Mon Nov 04 17:18:30 EST 2019	Sample#2731355554197799010	m	40	40x	Gen1 MCFO (40x)	NA
R13B06	attP2	pBPhsFlp2_PEST_brp_SNAP_MCFO_0128	20191022_63_J5	Mon Nov 04 17:18:30 EST 2019	Sample#2731355555049242722	m	40	40x	Gen1 MCFO (40x)	NA
R13B06	attP2	pBPhsFlp2_PEST_brp_SNAP_MCFO_0128	20191022_63_J6	Mon Nov 04 17:18:30 EST 2019	Sample#2731355555892297826	m	40	40x	Gen1 MCFO (40x)	NA
R13B06	attP2	pBPhsFlp2_PEST_brp_SNAP_MCFO_0128	20191022_63_J7	Mon Nov 04 17:18:30 EST 2019	Sample#2731355556735352930	m	40	40x	Gen1 MCFO (40x)	NA
R13B06	attP2	pBPhsFlp2_PEST_brp_SNAP_MCFO_0128	20191022_63_J8	Mon Nov 04 17:18:31 EST 2019	Sample#2731355557595185250	m	40	40x	Gen1 MCFO (40x)	NA
R13B07	attP2	57C10PEST_brp_SNAP_MCFO_X23_0099	20181121_65_C1	Fri Dec 14 16:42:31 EST 2018	Sample#2613570444552306786	f		40x	Gen1 MCFO (40x)	NA
R13B07	attP2	57C10PEST_brp_SNAP_MCFO_X23_0099	20181121_65_C2	Fri Dec 14 16:42:31 EST 2018	Sample#2613570445189840994	f		40x	Gen1 MCFO (40x)	NA
R13B07	attP2	57C10PEST_brp_SNAP_MCFO_X23_0099	20181121_65_C3	Fri Dec 14 16:42:32 EST 2018	Sample#2613570445760266338	f		40x	Gen1 MCFO (40x)	NA
R13B07	attP2	57C10PEST_brp_SNAP_MCFO_X23_0099	20181121_65_C4	Fri Dec 14 16:42:32 EST 2018	Sample#2613570446339080290	f		40x	Gen1 MCFO (40x)	NA
R13B07	attP2	57C10PEST_brp_SNAP_MCFO_X23_0099	20181121_65_C5	Fri Dec 14 16:42:32 EST 2018	Sample#2613570446917894242	f		40x	Gen1 MCFO (40x)	NA
R13B07	attP2	57C10PEST_brp_SNAP_MCFO_X23_0099	20181121_65_C6	Fri Dec 14 16:42:40 EST 2018	Sample#2613570480950476898	f		40x	Gen1 MCFO (40x)	NA
R13B08	attP2	57C10PEST_attp8_3stop1	20161222_28_E1	Fri Dec 30 13:07:35 EST 2016	Sample#2354771416622039138	f		20x	Annotator Gen1 MCFO	Gabriella Sterne
R13B08	attP2	57C10PEST_attp8_3stop1	20161222_28_E2	Fri Dec 30 13:07:35 EST 2016	Sample#2354771416760451170	f		20x	Annotator Gen1 MCFO	Gabriella Sterne
R13B08	attP2	57C10PEST_attp8_3stop1	20161222_28_E3	Fri Dec 30 13:07:35 EST 2016	Sample#2354771416894668898	f		20x	Annotator Gen1 MCFO	Gabriella Sterne
R13B08	attP2	57C10PEST_brp_SNAP_MCFO_X23_0099	20180831_62_D1	Thu Sep 13 18:20:56 EDT 2018	Sample#2580240426757783650	f		40x	Gen1 MCFO (40x)	NA
R13B08	attP2	57C10PEST_brp_SNAP_MCFO_X23_0099	20180831_62_D2	Thu Sep 13 18:20:56 EDT 2018	Sample#2580240427038802018	f		40x	Gen1 MCFO (40x)	NA
R13B08	attP2	57C10PEST_brp_SNAP_MCFO_X23_0099	20180831_62_D3	Thu Sep 13 18:20:56 EDT 2018	Sample#2580240427319820386	f		40x	Gen1 MCFO (40x)	NA
R13B08	attP2	57C10PEST_brp_SNAP_MCFO_X23_0099	20180831_62_D4	Thu Sep 13 18:20:56 EDT 2018	Sample#2580240427600838754	f		40x	Gen1 MCFO (40x)	NA
R13B08	attP2	57C10PEST_brp_SNAP_MCFO_X23_0099	20180831_62_D5	Thu Sep 13 18:20:56 EDT 2018	Sample#2580240427881857122	f		40x	Gen1 MCFO (40x)	NA
R13B08	attP2	57C10PEST_brp_SNAP_MCFO_X23_0099	20180831_62_D6	Thu Sep 13 18:20:56 EDT 2018	Sample#2580240428167069794	f		40x	Gen1 MCFO (40x)	NA
R13B08	attP2	pBPhsFlp2_PEST_brp_SNAP_MCFO_0128	20191203_66_I1	Tue Dec 24 12:47:35 EST 2019	Sample#2749406771645775970	m	40	40x	Gen1 MCFO (40x)	NA
R13B08	attP2	pBPhsFlp2_PEST_brp_SNAP_MCFO_0128	20191203_66_I2	Tue Dec 24 12:47:36 EST 2019	Sample#2749406772740489314	m	40	40x	Gen1 MCFO (40x)	NA
R13B08	attP2	pBPhsFlp2_PEST_brp_SNAP_MCFO_0128	20191203_66_I3	Tue Dec 24 12:47:36 EST 2019	Sample#2749406773860368482	m	40	40x	Gen1 MCFO (40x)	NA
R13B08	attP2	pBPhsFlp2_PEST_brp_SNAP_MCFO_0128	20191203_66_I4	Tue Dec 24 12:47:36 EST 2019	Sample#2749406774896361570	m	40	40x	Gen1 MCFO (40x)	NA
R13B08	attP2	pBPhsFlp2_PEST_brp_SNAP_MCFO_0128	20191203_66_I5	Tue Dec 24 12:47:36 EST 2019	Sample#2749406775928160354	m	40	40x	Gen1 MCFO (40x)	NA
R13B08	attP2	pBPhsFlp2_PEST_brp_SNAP_MCFO_0128	20191203_66_I6	Tue Dec 24 12:47:37 EST 2019	Sample#2749406776964153442	m	40	40x	Gen1 MCFO (40x)	NA
R13B10	attP2	57C10PEST_brp_SNAP_MCFO_X23_0099	20181121_65_D1	Fri Dec 14 16:43:04 EST 2018	Sample#2613570582687514722	f		40x	Gen1 MCFO (40x)	NA
R13B10	attP2	57C10PEST_brp_SNAP_MCFO_X23_0099	20190514_62_H3	Wed Jun 05 17:36:42 EDT 2019	Sample#2676262082055241826	f		40x	Gen1 MCFO (40x)	NA
R13B10	attP2	57C10PEST_brp_SNAP_MCFO_X23_0099	20190514_62_H4	Wed Jun 05 17:36:43 EDT 2019	Sample#2676262082499838050	f		40x	Gen1 MCFO (40x)	NA
R13B10	attP2	57C10PEST_brp_SNAP_MCFO_X23_0099	20190514_62_H5	Wed Jun 05 17:36:43 EDT 2019	Sample#2676262082944434274	f		40x	Gen1 MCFO (40x)	NA
R13B10	attP2	57C10PEST_brp_SNAP_MCFO_X23_0099	20190514_62_H6	Wed Jun 05 17:36:43 EDT 2019	Sample#2676262083389030498	f		40x	Gen1 MCFO (40x)	NA
R13B10	attP2	57C10PEST_brp_SNAP_MCFO_X23_0099	20190514_62_I1	Wed Jun 05 17:36:43 EDT 2019	Sample#2676262083829432418	f		40x	Gen1 MCFO (40x)	NA
R13B10	attP2	pBPhsFlp2_PEST_brp_SNAP_MCFO_0128	20190809_62_H1	Thu Aug 29 11:59:03 EDT 2019	Sample#2706980078096482402	m	13	40x	Gen1 MCFO (40x)	NA
R13B10	attP2	pBPhsFlp2_PEST_brp_SNAP_MCFO_0128	20190809_62_H2	Thu Aug 29 11:59:03 EDT 2019	Sample#2706980078549467234	m	13	40x	Gen1 MCFO (40x)	NA
R13B10	attP2	pBPhsFlp2_PEST_brp_SNAP_MCFO_0128	20190809_62_H3	Thu Aug 29 11:59:04 EDT 2019	Sample#2706980079002452066	m	13	40x	Gen1 MCFO (40x)	NA
R13B10	attP2	pBPhsFlp2_PEST_brp_SNAP_MCFO_0128	20190809_62_H4	Thu Aug 29 11:59:04 EDT 2019	Sample#2706980079455436898	m	13	40x	Gen1 MCFO (40x)	NA
R13B10	attP2	pBPhsFlp2_PEST_brp_SNAP_MCFO_0128	20190809_62_H6	Thu Aug 29 11:59:04 EDT 2019	Sample#2706980079912616034	m	13	40x	Gen1 MCFO (40x)	NA
R13B10	attP2	pBPhsFlp2_PEST_brp_SNAP_MCFO_0128	20190809_62_I1	Fri Sep 27 16:04:48 EDT 2019	Sample#2717551169730773090	m	13	40x	Gen1 MCFO (40x)	NA
R13B10	attP2	pBPhsFlp2_PEST_brp_SNAP_MCFO_0128	20190809_62_I2	Fri Sep 27 16:04:48 EDT 2019	Sample#2717551170225700962	m	13	40x	Gen1 MCFO (40x)	NA
R13B10	attP2	pBPhsFlp2_PEST_brp_SNAP_MCFO_0128	20190809_62_I3	Fri Sep 27 16:04:48 EDT 2019	Sample#2717551170670297186	m	13	40x	Gen1 MCFO (40x)	NA
R13B10	attP2	pBPhsFlp2_PEST_brp_SNAP_MCFO_0128	20190809_62_I4	Fri Sep 27 16:04:48 EDT 2019	Sample#2717551171123282018	m	13	40x	Gen1 MCFO (40x)	NA
R13B10	attP2	pBPhsFlp2_PEST_brp_SNAP_MCFO_0128	20190809_62_I5	Fri Sep 27 16:04:48 EDT 2019	Sample#2717551171580461154	m	13	40x	Gen1 MCFO (40x)	NA
R13C04	attP2	57C10PEST_brp_SNAP_MCFO_X23_0099	20181121_65_E1	Fri Dec 14 16:43:28 EST 2018	Sample#2613570683648606306	f		40x	Gen1 MCFO (40x)	NA
R13C04	attP2	57C10PEST_brp_SNAP_MCFO_X23_0099	20181121_65_E2	Fri Dec 14 16:43:36 EST 2018	Sample#2613570715563065442	f		40x	Gen1 MCFO (40x)	NA
R13C04	attP2	57C10PEST_brp_SNAP_MCFO_X23_0099	20181121_65_E3	Fri Dec 14 16:43:36 EST 2018	Sample#2613570716175433826	f		40x	Gen1 MCFO (40x)	NA
R13C04	attP2	57C10PEST_brp_SNAP_MCFO_X23_0099	20181121_65_E4	Fri Dec 14 16:43:36 EST 2018	Sample#2613570716812972130	f		40x	Gen1 MCFO (40x)	NA
R13C04	attP2	57C10PEST_brp_SNAP_MCFO_X23_0099	20181121_65_E5	Fri Dec 14 16:43:36 EST 2018	Sample#2613570717400170594	f		40x	Gen1 MCFO (40x)	NA
R13C04	attP2	57C10PEST_brp_SNAP_MCFO_X23_0099	20181121_65_E6	Fri Dec 14 16:43:36 EST 2018	Sample#2613570717983178850	f		40x	Gen1 MCFO (40x)	NA
R13C04	attP2	pBPhsFlp2_PEST_brp_SNAP_MCFO_0128	20191015_61_C1	Fri Oct 25 16:39:30 EDT 2019	Sample#2727706763884232802	m	13	40x	Gen1 MCFO (40x)	NA
R13C04	attP2	pBPhsFlp2_PEST_brp_SNAP_MCFO_0128	20191015_61_C2	Fri Oct 25 16:39:31 EDT 2019	Sample#2727706764945391714	m	13	40x	Gen1 MCFO (40x)	NA
R13C04	attP2	pBPhsFlp2_PEST_brp_SNAP_MCFO_0128	20191015_61_C3	Fri Oct 25 16:39:31 EDT 2019	Sample#2727706765826195554	m	13	40x	Gen1 MCFO (40x)	NA
R13C04	attP2	pBPhsFlp2_PEST_brp_SNAP_MCFO_0128	20191015_61_C4	Fri Oct 25 16:39:40 EDT 2019	Sample#2727706803692372066	m	13	40x	Gen1 MCFO (40x)	NA
R13C04	attP2	pBPhsFlp2_PEST_brp_SNAP_MCFO_0128	20191015_61_C5	Fri Oct 25 16:39:40 EDT 2019	Sample#2727706804602536034	m	13	40x	Gen1 MCFO (40x)	NA
R13C04	attP2	pBPhsFlp2_PEST_brp_SNAP_MCFO_0128	20191015_61_C6	Fri Oct 25 16:39:40 EDT 2019	Sample#2727706805441396834	m	13	40x	Gen1 MCFO (40x)	NA
R13C04	attP2	pBPhsFlp2_PEST_brp_SNAP_MCFO_0128	20191015_61_C7	Fri Oct 25 16:39:40 EDT 2019	Sample#2727706806267674722	m	13	40x	Gen1 MCFO (40x)	NA
R13C04	attP2	pBPhsFlp2_PEST_brp_SNAP_MCFO_0128	20191015_61_C8	Fri Oct 25 16:39:41 EDT 2019	Sample#2727706807093952610	m	13	40x	Gen1 MCFO (40x)	NA
R13C04	attP2	pBPhsFlp2_PEST_brp_SNAP_MCFO_0128	20191015_61_C9	Fri Oct 25 16:39:41 EDT 2019	Sample#2727706807920230498	m	13	40x	Gen1 MCFO (40x)	NA
R13C08	attP2	57C10PEST_brp_SNAP_MCFO_X23_0099	20181121_65_F1	Fri Dec 14 16:43:37 EST 2018	Sample#2613570718532632674	f		40x	Gen1 MCFO (40x)	NA
R13C08	attP2	57C10PEST_brp_SNAP_MCFO_X23_0099	20181121_65_F6	Fri Dec 14 16:43:37 EST 2018	Sample#2613570720424263778	f		40x	Gen1 MCFO (40x)	NA
R13D04	attP2	57C10PEST_attp18_4stop1	20160303_20_A1	Wed Mar 09 00:45:28 EST 2016	Sample#2247317851499135074	f		20x	Annotator Gen1 MCFO	Masayoshi Ito
R13D04	attP2	57C10PEST_attp18_4stop1	20160303_20_A2	Fri Apr 29 16:16:52 EDT 2016	Sample#2266018925269483594	f		20x, 63x	Annotator Gen1 MCFO	Masayoshi Ito
R13D04	attP2	57C10PEST_attp18_4stop1	20160303_20_A3	Fri Apr 29 16:16:54 EDT 2016	Sample#2266018933431599178	f		20x, 63x	Annotator Gen1 MCFO	Masayoshi Ito
R13D04	attP2	57C10PEST_attp18_4stop1	20160303_20_A4	Wed Mar 09 00:45:29 EST 2016	Sample#2247317852728066146	f		20x	Annotator Gen1 MCFO	Masayoshi Ito
R13D04	attP2	57C10PEST_attp18_4stop1	20160303_20_A5	Wed Mar 09 00:45:29 EST 2016	Sample#2247317853122330722	f		20x	Annotator Gen1 MCFO	Masayoshi Ito
R13D04	attP2	57C10PEST_attp18_4stop1	20160303_20_A6	Wed Mar 09 00:45:29 EST 2016	Sample#2247317853524983906	f		20x	Annotator Gen1 MCFO	Masayoshi Ito
R13D04	attP2	57C10PEST_attp18_4stop1	20160303_20_A7	Fri Apr 29 16:16:56 EDT 2016	Sample#2266018944009633866	f		20x, 63x	Annotator Gen1 MCFO	Masayoshi Ito
R13D04	attP2	57C10PEST_attp18_4stop1	20160303_20_A8	Fri Apr 29 16:17:01 EDT 2016	Sample#2266018963425067082	f		20x, 63x	Annotator Gen1 MCFO	Masayoshi Ito
R13D04	attP2	57C10PEST_brp_SNAP_MCFO_X23_0099	20181121_65_G1	Fri Dec 14 16:43:37 EST 2018	Sample#2613570720986300514	f		40x	Gen1 MCFO (40x)	NA
R13D04	attP2	57C10PEST_brp_SNAP_MCFO_X23_0099	20181121_65_G2	Fri Dec 14 16:43:37 EST 2018	Sample#2613570721577697378	f		40x	Gen1 MCFO (40x)	NA
R13D04	attP2	57C10PEST_brp_SNAP_MCFO_X23_0099	20181121_65_G3	Fri Dec 14 16:43:37 EST 2018	Sample#2613570722152317026	f		40x	Gen1 MCFO (40x)	NA
R13D04	attP2	57C10PEST_brp_SNAP_MCFO_X23_0099	20181121_65_G4	Fri Dec 14 16:43:38 EST 2018	Sample#2613570722739519586	f		40x	Gen1 MCFO (40x)	NA
R13D04	attP2	57C10PEST_brp_SNAP_MCFO_X23_0099	20181121_65_G5	Fri Dec 14 16:43:38 EST 2018	Sample#2613570723368665186	f		40x	Gen1 MCFO (40x)	NA
R13D04	attP2	57C10PEST_brp_SNAP_MCFO_X23_0099	20181121_65_G6	Fri Dec 14 16:43:38 EST 2018	Sample#2613570724002005090	f		40x	Gen1 MCFO (40x)	NA
R13D04	attP2	pBPhsFlp2_PEST_brp_SNAP_MCFO_0128	20191022_63_K1	Mon Nov 04 18:58:08 EST 2019	Sample#2731380630456631394	m	40	40x	Gen1 MCFO (40x)	NA
R13D04	attP2	pBPhsFlp2_PEST_brp_SNAP_MCFO_0128	20191022_63_K3	Mon Nov 04 18:58:09 EST 2019	Sample#2731380631379378274	m	40	40x	Gen1 MCFO (40x)	NA
R13D04	attP2	pBPhsFlp2_PEST_brp_SNAP_MCFO_0128	20191022_63_K4	Mon Nov 04 17:19:10 EST 2019	Sample#2731355721508585570	m	40	40x	Gen1 MCFO (40x)	NA
R13D04	attP2	pBPhsFlp2_PEST_brp_SNAP_MCFO_0128	20191022_63_K5	Mon Nov 04 17:19:10 EST 2019	Sample#2731355722364223586	m	40	40x	Gen1 MCFO (40x)	NA
R13D04	attP2	pBPhsFlp2_PEST_brp_SNAP_MCFO_0128	20191022_63_K6	Mon Nov 04 18:58:09 EST 2019	Sample#2731380632230821986	m	40	40x	Gen1 MCFO (40x)	NA
R13D04	attP2	pBPhsFlp2_PEST_brp_SNAP_MCFO_0128	20191022_63_K7	Mon Nov 04 17:19:10 EST 2019	Sample#2731355723211472994	m	40	40x	Gen1 MCFO (40x)	NA
R13D04	attP2	pBPhsFlp2_PEST_brp_SNAP_MCFO_0128	20191022_63_K8	Mon Nov 04 17:19:10 EST 2019	Sample#2731355724062916706	m	40	40x	Gen1 MCFO (40x)	NA
R13D04	attP2	pBPhsFlp2_PEST_brp_SNAP_MCFO_0128	20191022_63_K9	Mon Nov 04 17:19:22 EST 2019	Sample#2731355773304045666	m	40	40x	Gen1 MCFO (40x)	NA
R13D05	attP2	57C10wt_attp8_3stop1	20130606_3_H4	Thu Apr 24 20:10:11 EDT 2014	Sample#1999360172929056866	f		20x	Annotator Gen1 MCFO	Tanya Wolff
R13D05	attP2	57C10wt_attp8_3stop1	20130606_3_H5	Thu Apr 24 20:10:11 EDT 2014	Sample#1999360173633699938	f		20x	Annotator Gen1 MCFO	Tanya Wolff
R13D05	attP2	57C10wt_attp8_3stop1	20130606_3_H6	Thu Apr 24 20:10:11 EDT 2014	Sample#1999360174338343010	f		20x	Annotator Gen1 MCFO	Tanya Wolff
R13D05	attP2	57C10wt_attp8_3stop1	20130606_3_I1	Thu Apr 24 20:10:12 EDT 2014	Sample#1999360175181398114	f		20x	Annotator Gen1 MCFO	Tanya Wolff
R13D05	attP2	57C10wt_attp8_3stop1	20130606_3_I2	Thu Apr 24 20:10:12 EDT 2014	Sample#1999360175881846882	f		20x	Annotator Gen1 MCFO	Tanya Wolff
R13D05	attP2	57C10wt_attp8_3stop1	20130606_3_I3	Thu Apr 24 20:10:12 EDT 2014	Sample#1999360176536158306	f		20x	Annotator Gen1 MCFO	Tanya Wolff
R13D05	attP2	57C10wt_attp8_3stop1	20130606_3_I4	Thu Apr 24 20:10:12 EDT 2014	Sample#1999360177182081122	f		20x	Annotator Gen1 MCFO	Tanya Wolff
R13D05	attP2	57C10wt_attp8_3stop1	20130606_3_I5	Thu Apr 24 20:10:12 EDT 2014	Sample#1999360177865752674	f		20x	Annotator Gen1 MCFO	Tanya Wolff
R13D05	attP2	57C10wt_attp8_3stop1	20130606_3_I6	Thu Apr 24 20:10:12 EDT 2014	Sample#1999360178562007138	f		20x	Annotator Gen1 MCFO	Tanya Wolff
R13D05	attP2	57C10wt_attp8_3stop1	20130606_3_J1	Thu Apr 24 20:10:13 EDT 2014	Sample#1999360179254067298	f		20x	Annotator Gen1 MCFO	Tanya Wolff
R13D05	attP2	57C10wt_attp8_3stop1	20130612_2_E3	Tue Apr 28 14:22:51 EDT 2015	Sample#2132993885238984802	f	15	20x, 63x	Annotator Gen1 MCFO	Tanya Wolff
R13D05	attP2	57C10wt_attp8_3stop1	20130612_2_E4	Tue Apr 28 14:23:32 EDT 2015	Sample#2132994057629073506	f	15	20x, 63x	Annotator Gen1 MCFO	Tanya Wolff
R13D05	attP2	57C10wt_attp8_3stop1	20130612_2_E5	Mon Jan 18 10:48:57 EST 2016	Sample#2228987939302408290	f	15	20x, 63x	Annotator Gen1 MCFO	Tanya Wolff
R13D05	attP2	57C10wt_attp8_3stop1	20130612_2_E6	Tue Apr 28 14:24:40 EDT 2015	Sample#2132994343441530978	f	15	20x, 63x	Annotator Gen1 MCFO	Tanya Wolff
R13D05	attP2	57C10wt_attp8_3stop1	20130612_2_F1	Tue Apr 28 14:25:09 EDT 2015	Sample#2132994464703053922	f	15	20x, 63x	Annotator Gen1 MCFO	Tanya Wolff
R13D05	attP2	57C10wt_attp8_3stop1	20130612_2_F2	Mon Jan 18 10:50:09 EST 2016	Sample#2228988244014399586	f	15	20x, 63x	Annotator Gen1 MCFO	Tanya Wolff
R13D05	attP2	57C10PEST_brp_SNAP_MCFO_X23_0099	20180831_62_E1	Thu Sep 13 18:20:56 EDT 2018	Sample#2580240428502614114	f		40x	Gen1 MCFO (40x)	NA
R13D05	attP2	57C10PEST_brp_SNAP_MCFO_X23_0099	20180831_62_E2	Thu Sep 13 18:20:56 EDT 2018	Sample#2580240428854935650	f		40x	Gen1 MCFO (40x)	NA
R13D05	attP2	57C10PEST_brp_SNAP_MCFO_X23_0099	20180831_62_E3	Thu Sep 13 18:20:56 EDT 2018	Sample#2580240429198868578	f		40x	Gen1 MCFO (40x)	NA
R13D05	attP2	57C10PEST_brp_SNAP_MCFO_X23_0099	20180831_62_E4	Thu Sep 13 18:20:56 EDT 2018	Sample#2580240429484081250	f		40x	Gen1 MCFO (40x)	NA
R13D05	attP2	57C10PEST_brp_SNAP_MCFO_X23_0099	20180831_62_E5	Thu Sep 13 18:20:57 EDT 2018	Sample#2580240429765099618	f		40x	Gen1 MCFO (40x)	NA
R13D05	attP2	57C10PEST_brp_SNAP_MCFO_X23_0099	20180831_62_E6	Thu Sep 13 18:20:57 EDT 2018	Sample#2580240430046117986	f		40x	Gen1 MCFO (40x)	NA
R13D09	attP2	57C10PEST_brp_SNAP_MCFO_X23_0099	20180831_62_F1	Thu Sep 13 18:20:57 EDT 2018	Sample#2580240430327136354	f		40x	Gen1 MCFO (40x)	NA
R13D09	attP2	57C10PEST_brp_SNAP_MCFO_X23_0099	20180831_62_F2	Thu Sep 13 18:20:57 EDT 2018	Sample#2580240430608154722	f		40x	Gen1 MCFO (40x)	NA
R13D09	attP2	57C10PEST_brp_SNAP_MCFO_X23_0099	20180831_62_F3	Thu Sep 13 18:20:57 EDT 2018	Sample#2580240430889173090	f		40x	Gen1 MCFO (40x)	NA
R13D09	attP2	57C10PEST_brp_SNAP_MCFO_X23_0099	20180831_62_F4	Thu Sep 13 18:20:57 EDT 2018	Sample#2580240431165997154	f		40x	Gen1 MCFO (40x)	NA
R13D09	attP2	57C10PEST_brp_SNAP_MCFO_X23_0099	20180831_62_F5	Thu Sep 13 18:20:57 EDT 2018	Sample#2580240431447015522	f		40x	Gen1 MCFO (40x)	NA
R13D09	attP2	57C10PEST_brp_SNAP_MCFO_X23_0099	20180831_62_F6	Tue Sep 18 16:17:40 EDT 2018	Sample#2582021347995549794	f		40x	Gen1 MCFO (40x)	NA
R13D09	attP2	57C10PEST_brp_SNAP_MCFO_X23_0099	20180831_62_G1	Tue Sep 18 16:17:41 EDT 2018	Sample#2582021348301733986	f		40x	Gen1 MCFO (40x)	NA
R13D10	attP2	57C10L_brp_SNAP_MCFO_X23_0117	20190517_61_A1	Tue May 28 12:55:29 EDT 2019	Sample#2673292207770828898	f		40x	Gen1 MCFO (40x)	NA
R13D10	attP2	57C10L_brp_SNAP_MCFO_X23_0117	20190517_61_A2	Tue May 28 12:55:29 EDT 2019	Sample#2673292208244785250	f		40x	Gen1 MCFO (40x)	NA
R13D10	attP2	57C10L_brp_SNAP_MCFO_X23_0117	20190517_61_A3	Tue May 28 12:55:29 EDT 2019	Sample#2673292208672604258	f		40x	Gen1 MCFO (40x)	NA
R13D10	attP2	57C10L_brp_SNAP_MCFO_X23_0117	20190517_61_A4	Tue May 28 12:55:30 EDT 2019	Sample#2673292209125589090	f		40x	Gen1 MCFO (40x)	NA
R13D10	attP2	57C10L_brp_SNAP_MCFO_X23_0117	20190517_61_A6	Tue May 28 12:55:30 EDT 2019	Sample#2673292210006392930	f		40x	Gen1 MCFO (40x)	NA
R13D10	attP2	57C10PEST_brp_SNAP_MCFO_X23_0099	20181106_63_B3	Fri Nov 30 14:25:46 EST 2018	Sample#2608462597028053090	f		40x	Gen1 MCFO (40x)	NA
R13D10	attP2	pBPhsFlp2_PEST_brp_SNAP_MCFO_0128	20190716_62_J1	Thu Aug 22 10:58:14 EDT 2019	Sample#2704428056948244578	m	40	40x	Gen1 MCFO (40x)	NA
R13D10	attP2	pBPhsFlp2_PEST_brp_SNAP_MCFO_0128	20190716_62_J2	Thu Aug 22 10:58:14 EDT 2019	Sample#2704428057422200930	m	40	40x	Gen1 MCFO (40x)	NA
R13D10	attP2	pBPhsFlp2_PEST_brp_SNAP_MCFO_0128	20190716_62_J6	Tue Aug 06 09:15:59 EDT 2019	Sample#2698604119119102050	m	40	40x	Gen1 MCFO (40x)	NA
R13E04	attP2	57C10PEST_brp_SNAP_MCFO_X23_0099	20181121_65_H1	Fri Dec 14 16:43:38 EST 2018	Sample#2613570724576624738	f		40x	Gen1 MCFO (40x)	NA
R13E04	attP2	57C10PEST_brp_SNAP_MCFO_X23_0099	20181121_65_H2	Fri Dec 14 16:43:38 EST 2018	Sample#2613570725151244386	f		40x	Gen1 MCFO (40x)	NA
R13E04	attP2	57C10PEST_brp_SNAP_MCFO_X23_0099	20181121_65_H3	Fri Dec 14 16:43:38 EST 2018	Sample#2613570725721669730	f		40x	Gen1 MCFO (40x)	NA
R13E04	attP2	57C10PEST_brp_SNAP_MCFO_X23_0099	20181121_65_H4	Fri Dec 14 16:43:38 EST 2018	Sample#2613570726304677986	f		40x	Gen1 MCFO (40x)	NA
R13E04	attP2	57C10PEST_brp_SNAP_MCFO_X23_0099	20181121_65_H5	Fri Dec 14 16:43:39 EST 2018	Sample#2613570726896074850	f		40x	Gen1 MCFO (40x)	NA
R13E04	attP2	57C10PEST_brp_SNAP_MCFO_X23_0099	20181121_65_H6	Fri Dec 21 09:46:54 EST 2018	Sample#2616002566252658786	f		40x	Gen1 MCFO (40x)	NA
R13E04	attP2	pBPhsFlp2_PEST_brp_SNAP_MCFO_0128	20191022_63_L1	Mon Nov 04 17:19:25 EST 2019	Sample#2731355786222501986	m	40	40x	Gen1 MCFO (40x)	NA
R13E04	attP2	pBPhsFlp2_PEST_brp_SNAP_MCFO_0128	20191022_63_L10	Mon Nov 04 17:19:27 EST 2019	Sample#2731355793344430178	m	40	40x	Gen1 MCFO (40x)	NA
R13E04	attP2	pBPhsFlp2_PEST_brp_SNAP_MCFO_0128	20191022_63_L2	Mon Nov 04 17:19:25 EST 2019	Sample#2731355787182997602	m	40	40x	Gen1 MCFO (40x)	NA
R13E04	attP2	pBPhsFlp2_PEST_brp_SNAP_MCFO_0128	20191022_63_L3	Mon Nov 04 17:19:26 EST 2019	Sample#2731355788118327394	m	40	40x	Gen1 MCFO (40x)	NA
R13E04	attP2	pBPhsFlp2_PEST_brp_SNAP_MCFO_0128	20191022_63_L4	Mon Nov 04 17:19:26 EST 2019	Sample#2731355789074628706	m	40	40x	Gen1 MCFO (40x)	NA
R13E04	attP2	pBPhsFlp2_PEST_brp_SNAP_MCFO_0128	20191022_63_L5	Mon Nov 04 17:19:26 EST 2019	Sample#2731355789947043938	m	40	40x	Gen1 MCFO (40x)	NA
R13E04	attP2	pBPhsFlp2_PEST_brp_SNAP_MCFO_0128	20191022_63_L6	Mon Nov 04 17:19:26 EST 2019	Sample#2731355790811070562	m	40	40x	Gen1 MCFO (40x)	NA
R13E04	attP2	pBPhsFlp2_PEST_brp_SNAP_MCFO_0128	20191022_63_L8	Mon Nov 04 17:19:26 EST 2019	Sample#2731355791654125666	m	40	40x	Gen1 MCFO (40x)	NA
R13E04	attP2	pBPhsFlp2_PEST_brp_SNAP_MCFO_0128	20191022_63_L9	Mon Nov 04 17:19:27 EST 2019	Sample#2731355792492986466	m	40	40x	Gen1 MCFO (40x)	NA
R13E12	attP2	57C10PEST_attp8_3stop1	20130520_3_C4	Mon Feb 24 14:16:06 EST 2014	Sample#1977905281379598434	f		20x	Annotator Gen1 MCFO	Tanya Wolff
R13E12	attP2	57C10PEST_attp8_3stop1	20130520_3_C5	Mon Feb 24 14:16:06 EST 2014	Sample#1977905281803223138	f		20x	Annotator Gen1 MCFO	Tanya Wolff
R13E12	attP2	57C10PEST_attp8_3stop1	20130520_3_C6	Mon Feb 24 14:16:06 EST 2014	Sample#1977905282235236450	f		20x	Annotator Gen1 MCFO	Tanya Wolff
R13E12	attP2	57C10PEST_attp8_3stop1	20130520_3_D1	Mon Feb 24 14:16:07 EST 2014	Sample#1977905282650472546	f		20x	Annotator Gen1 MCFO	Tanya Wolff
R13E12	attP2	57C10PEST_attp8_3stop1	20130520_3_D2	Mon Feb 24 14:16:07 EST 2014	Sample#1977905283195732066	f		20x	Annotator Gen1 MCFO	Tanya Wolff
R13E12	attP2	57C10PEST_attp8_3stop1	20130520_3_D3	Mon Feb 24 14:16:07 EST 2014	Sample#1977905283539664994	f		20x	Annotator Gen1 MCFO	Tanya Wolff
R13E12	attP2	57C10PEST_attp8_3stop1	20130520_3_D4	Mon Feb 24 14:16:07 EST 2014	Sample#1977905283980066914	f		20x	Annotator Gen1 MCFO	Tanya Wolff
R13E12	attP2	57C10PEST_attp8_3stop1	20130520_3_D5	Mon Feb 24 14:16:07 EST 2014	Sample#1977905284399497314	f		20x	Annotator Gen1 MCFO	Tanya Wolff
R13E12	attP2	57C10PEST_attp8_3stop1	20130520_3_D6	Mon Feb 24 14:16:07 EST 2014	Sample#1977905284835704930	f		20x	Annotator Gen1 MCFO	Tanya Wolff
R13E12	attP2	57C10PEST_attp8_3stop1	20130520_3_E1	Mon Feb 24 14:16:07 EST 2014	Sample#1977905285255135330	f		20x	Annotator Gen1 MCFO	Tanya Wolff
R13E12	attP2	57C10PEST_attp8_3stop1	20130520_3_E2	Mon Feb 24 14:16:07 EST 2014	Sample#1977905285653594210	f		20x	Annotator Gen1 MCFO	Tanya Wolff
R13E12	attP2	57C10PEST_attp8_3stop1	20130520_3_E3	Mon Feb 24 14:16:07 EST 2014	Sample#1977905285989138530	f		20x	Annotator Gen1 MCFO	Tanya Wolff
R13E12	attP2	57C10PEST_attp8_3stop1	20130520_3_E4	Mon Feb 24 14:16:07 EST 2014	Sample#1977905286416957538	f		20x	Annotator Gen1 MCFO	Tanya Wolff
R13E12	attP2	57C10PEST_attp8_3stop1	20130520_3_E5	Mon Feb 24 14:16:08 EST 2014	Sample#1977905286970605666	f		20x	Annotator Gen1 MCFO	Tanya Wolff
R13E12	attP2	57C10PEST_attp8_3stop1	20130520_3_E6	Mon Feb 24 14:16:08 EST 2014	Sample#1977905287503282274	f		20x	Annotator Gen1 MCFO	Tanya Wolff
R13E12	attP2	57C10PEST_attp8_3stop1	20130520_3_F1	Mon Feb 24 14:16:08 EST 2014	Sample#1977905287868186722	f		20x	Annotator Gen1 MCFO	Tanya Wolff
R13E12	attP2	57C10PEST_attp8_3stop1	20130520_3_F2	Mon Feb 24 14:16:08 EST 2014	Sample#1977905288266645602	f		20x	Annotator Gen1 MCFO	Tanya Wolff
R13E12	attP2	57C10PEST_attp8_3stop1	20130725_1_D2	Tue May 13 14:09:22 EDT 2014	Sample#2006154738587926626	f		20x	Annotator Gen1 MCFO	Tanya Wolff
R13E12	attP2	57C10PEST_attp8_3stop1	20130725_1_D3	Tue May 13 14:09:22 EDT 2014	Sample#2006154739602948194	f		20x	Annotator Gen1 MCFO	Tanya Wolff
R13E12	attP2	57C10PEST_attp8_3stop1	20130725_1_D4	Tue May 13 14:09:22 EDT 2014	Sample#2006154740643135586	f		20x	Annotator Gen1 MCFO	Tanya Wolff
R13E12	attP2	57C10PEST_attp8_3stop1	20130725_1_D6	Tue May 13 14:09:23 EDT 2014	Sample#2006154743788863586	f		20x	Annotator Gen1 MCFO	Tanya Wolff
R13E12	attP2	57C10PEST_attp8_3stop1	20130725_1_E2	Tue May 13 14:09:23 EDT 2014	Sample#2006154745886015586	f		20x	Annotator Gen1 MCFO	Tanya Wolff
R13E12	attP2	57C10PEST_attp8_3stop1	20130725_1_E3	Tue May 13 14:09:24 EDT 2014	Sample#2006154746913620066	f		20x	Annotator Gen1 MCFO	Tanya Wolff
R13E12	attP2	57C10PEST_attp8_3stop1	20130725_1_E4	Tue May 13 14:09:24 EDT 2014	Sample#2006154747861532770	f		20x	Annotator Gen1 MCFO	Tanya Wolff
R13E12	attP2	57C10PEST_attp8_3stop1	20130725_1_E5	Tue May 13 14:09:24 EDT 2014	Sample#2006154748863971426	f		20x	Annotator Gen1 MCFO	Tanya Wolff
R13E12	attP2	57C10PEST_brp_SNAP_MCFO_X23_0099	20181121_65_I1	Fri Dec 21 09:46:55 EST 2018	Sample#2616002570216276066	f		40x	Gen1 MCFO (40x)	NA
R13E12	attP2	57C10PEST_brp_SNAP_MCFO_X23_0099	20181121_65_I2	Fri Dec 21 09:46:55 EST 2018	Sample#2616002567385120866	f		40x	Gen1 MCFO (40x)	NA
R13E12	attP2	57C10PEST_brp_SNAP_MCFO_X23_0099	20181121_65_I3	Fri Dec 21 09:46:55 EST 2018	Sample#2616002567951351906	f		40x	Gen1 MCFO (40x)	NA
R13E12	attP2	57C10PEST_brp_SNAP_MCFO_X23_0099	20181121_65_I4	Fri Dec 21 09:46:55 EST 2018	Sample#2616002568517582946	f		40x	Gen1 MCFO (40x)	NA
R13E12	attP2	57C10PEST_brp_SNAP_MCFO_X23_0099	20181121_65_I5	Fri Dec 21 09:46:55 EST 2018	Sample#2616002569079619682	f		40x	Gen1 MCFO (40x)	NA
R13E12	attP2	57C10PEST_brp_SNAP_MCFO_X23_0099	20181121_65_I6	Fri Dec 21 09:46:55 EST 2018	Sample#2616002569641656418	f		40x	Gen1 MCFO (40x)	NA
R13E12	attP2	57C10PEST_brp_SNAP_MCFO_X23_0099	20181121_65_J1	Thu Dec 10 16:30:28 EST 2020	Sample#2877023389623517282	f		40x	Gen1 MCFO (40x)	NA
R13E12	attP2	pBPhsFlp2_PEST_brp_SNAP_MCFO_0128	20191015_61_D1	Fri Oct 25 16:39:41 EDT 2019	Sample#2727706808746508386	m	13	40x	Gen1 MCFO (40x)	NA
R13E12	attP2	pBPhsFlp2_PEST_brp_SNAP_MCFO_0128	20191015_61_D10	Fri Oct 25 16:39:43 EDT 2019	Sample#2727706816396918882	m	13	40x	Gen1 MCFO (40x)	NA
R13E12	attP2	pBPhsFlp2_PEST_brp_SNAP_MCFO_0128	20191015_61_D2	Fri Oct 25 16:39:41 EDT 2019	Sample#2727706809707004002	m	13	40x	Gen1 MCFO (40x)	NA
R13E12	attP2	pBPhsFlp2_PEST_brp_SNAP_MCFO_0128	20191015_61_D3	Fri Oct 25 16:39:41 EDT 2019	Sample#2727706810600390754	m	13	40x	Gen1 MCFO (40x)	NA
R13E12	attP2	pBPhsFlp2_PEST_brp_SNAP_MCFO_0128	20191015_61_D4	Fri Oct 25 16:39:42 EDT 2019	Sample#2727706811493777506	m	13	40x	Gen1 MCFO (40x)	NA
R13E12	attP2	pBPhsFlp2_PEST_brp_SNAP_MCFO_0128	20191015_61_D5	Fri Oct 25 16:39:42 EDT 2019	Sample#2727706812311666786	m	13	40x	Gen1 MCFO (40x)	NA
R13E12	attP2	pBPhsFlp2_PEST_brp_SNAP_MCFO_0128	20191015_61_D6	Fri Oct 25 16:39:42 EDT 2019	Sample#2727706813129556066	m	13	40x	Gen1 MCFO (40x)	NA
R13E12	attP2	pBPhsFlp2_PEST_brp_SNAP_MCFO_0128	20191015_61_D7	Fri Oct 25 16:39:42 EDT 2019	Sample#2727706813947445346	m	13	40x	Gen1 MCFO (40x)	NA
R13E12	attP2	pBPhsFlp2_PEST_brp_SNAP_MCFO_0128	20191015_61_D8	Fri Oct 25 16:39:42 EDT 2019	Sample#2727706814761140322	m	13	40x	Gen1 MCFO (40x)	NA
R13E12	attP2	pBPhsFlp2_PEST_brp_SNAP_MCFO_0128	20191015_61_D9	Fri Oct 25 16:39:43 EDT 2019	Sample#2727706815579029602	m	13	40x	Gen1 MCFO (40x)	NA
R13F02	attP2	57C10PEST_brp_SNAP_MCFO_X23_0099	20181121_66_A1	Fri Jan 04 15:35:48 EST 2019	Sample#2621163799155048546	f		40x	Gen1 MCFO (40x)	NA
R13F02	attP2	57C10PEST_brp_SNAP_MCFO_X23_0099	20181121_66_A3	Fri Jan 04 15:35:48 EST 2019	Sample#2621163800367202402	f		40x	Gen1 MCFO (40x)	NA
R13F02	attP2	57C10PEST_brp_SNAP_MCFO_X23_0099	20181121_66_A4	Fri Jan 04 15:35:49 EST 2019	Sample#2621163800933433442	f		40x	Gen1 MCFO (40x)	NA
R13F02	attP2	57C10PEST_brp_SNAP_MCFO_X23_0099	20181121_66_A5	Fri Jan 04 15:35:49 EST 2019	Sample#2621163801491275874	f		40x	Gen1 MCFO (40x)	NA
R13F02	attP2	57C10PEST_brp_SNAP_MCFO_X23_0099	20181121_66_A6	Fri Jan 04 15:35:49 EST 2019	Sample#2621163802053312610	f		40x	Gen1 MCFO (40x)	NA
R13F02	attP2	pBPhsFlp2_PEST_brp_SNAP_MCFO_0128	20191015_61_E1	Fri Oct 25 16:39:43 EDT 2019	Sample#2727706817223196770	m	13	40x	Gen1 MCFO (40x)	NA
R13F02	attP2	pBPhsFlp2_PEST_brp_SNAP_MCFO_0128	20191015_61_E10	Fri Oct 25 16:39:45 EDT 2019	Sample#2727706824928133218	m	13	40x	Gen1 MCFO (40x)	NA
R13F02	attP2	pBPhsFlp2_PEST_brp_SNAP_MCFO_0128	20191015_61_E2	Fri Oct 25 16:39:43 EDT 2019	Sample#2727706818150137954	m	13	40x	Gen1 MCFO (40x)	NA
R13F02	attP2	pBPhsFlp2_PEST_brp_SNAP_MCFO_0128	20191015_61_E3	Fri Oct 25 16:39:44 EDT 2019	Sample#2727706819047719010	m	13	40x	Gen1 MCFO (40x)	NA
R13F02	attP2	pBPhsFlp2_PEST_brp_SNAP_MCFO_0128	20191015_61_E4	Fri Oct 25 16:39:44 EDT 2019	Sample#2727706819932717154	m	13	40x	Gen1 MCFO (40x)	NA
R13F02	attP2	pBPhsFlp2_PEST_brp_SNAP_MCFO_0128	20191015_61_E5	Fri Oct 25 16:39:44 EDT 2019	Sample#2727706820754800738	m	13	40x	Gen1 MCFO (40x)	NA
R13F02	attP2	pBPhsFlp2_PEST_brp_SNAP_MCFO_0128	20191015_61_E6	Fri Oct 25 16:39:44 EDT 2019	Sample#2727706821576884322	m	13	40x	Gen1 MCFO (40x)	NA
R13F02	attP2	pBPhsFlp2_PEST_brp_SNAP_MCFO_0128	20191015_61_E7	Fri Oct 25 16:39:44 EDT 2019	Sample#2727706822398967906	m	13	40x	Gen1 MCFO (40x)	NA
R13F02	attP2	pBPhsFlp2_PEST_brp_SNAP_MCFO_0128	20191015_61_E8	Fri Oct 25 16:39:44 EDT 2019	Sample#2727706823221051490	m	13	40x	Gen1 MCFO (40x)	NA
R13F02	attP2	pBPhsFlp2_PEST_brp_SNAP_MCFO_0128	20191015_61_E9	Fri Oct 25 16:39:45 EDT 2019	Sample#2727706824101855330	m	13	40x	Gen1 MCFO (40x)	NA
R13F04	attP2	57C10PEST_brp_SNAP_MCFO_X23_0099	20180831_62_H1	Tue Sep 18 16:17:41 EDT 2018	Sample#2582021348603723874	f		40x	Gen1 MCFO (40x)	NA
R13F04	attP2	57C10PEST_brp_SNAP_MCFO_X23_0099	20180831_62_H2	Tue Sep 18 16:17:41 EDT 2018	Sample#2582021348851187810	f		40x	Gen1 MCFO (40x)	NA
R13F04	attP2	57C10PEST_brp_SNAP_MCFO_X23_0099	20180831_62_H3	Tue Sep 18 16:17:41 EDT 2018	Sample#2582021349148983394	f		40x	Gen1 MCFO (40x)	NA
R13F04	attP2	57C10PEST_brp_SNAP_MCFO_X23_0099	20180831_62_H4	Tue Sep 18 16:17:41 EDT 2018	Sample#2582021349396447330	f		40x	Gen1 MCFO (40x)	NA
R13F04	attP2	57C10PEST_brp_SNAP_MCFO_X23_0099	20180831_62_H5	Tue Sep 18 16:17:41 EDT 2018	Sample#2582021349643911266	f		40x	Gen1 MCFO (40x)	NA
R13F04	attP2	57C10PEST_brp_SNAP_MCFO_X23_0099	20180831_62_H6	Tue Sep 18 16:17:41 EDT 2018	Sample#2582021349937512546	f		40x	Gen1 MCFO (40x)	NA
R13F07	attP2	57C10PEST_brp_SNAP_MCFO_X23_0099	20190430_65_B3	Tue May 14 16:02:41 EDT 2019	Sample#2668265888435667042	m		40x	Gen1 MCFO (40x)	NA
R13F07	attP2	57C10PEST_brp_SNAP_MCFO_X23_0099	20190430_65_B5	Tue May 14 16:02:41 EDT 2019	Sample#2668265888846708834	m		40x	Gen1 MCFO (40x)	NA
R13F07	attP2	57C10PEST_brp_SNAP_MCFO_X23_0099	20190430_65_B6	Tue May 14 16:02:41 EDT 2019	Sample#2668265889257750626	m		40x	Gen1 MCFO (40x)	NA
R13F07	attP2	57C10PEST_brp_SNAP_MCFO_X23_0099	20190430_65_C1	Tue May 14 16:02:42 EDT 2019	Sample#2668265889677181026	m		40x	Gen1 MCFO (40x)	NA
R13F07	attP2	pBPhsFlp2_PEST_brp_SNAP_MCFO_0128	20190917_62_G1	Tue Oct 01 17:44:14 EDT 2019	Sample#2719025744792518754	f	13	40x	Gen1 MCFO (40x)	NA
R13F07	attP2	pBPhsFlp2_PEST_brp_SNAP_MCFO_0128	20190917_62_G2	Tue Oct 01 17:44:14 EDT 2019	Sample#2719025745333583970	f	13	40x	Gen1 MCFO (40x)	NA
R13F07	attP2	pBPhsFlp2_PEST_brp_SNAP_MCFO_0128	20190917_62_G3	Tue Oct 01 17:44:14 EDT 2019	Sample#2719025745845289058	f	13	40x	Gen1 MCFO (40x)	NA
R13F07	attP2	pBPhsFlp2_PEST_brp_SNAP_MCFO_0128	20190917_62_G5	Tue Oct 01 17:44:14 EDT 2019	Sample#2719025746344411234	f	13	40x	Gen1 MCFO (40x)	NA
R13F07	attP2	pBPhsFlp2_PEST_brp_SNAP_MCFO_0128	20190917_62_G6	Tue Oct 01 17:44:15 EDT 2019	Sample#2719025746814173282	f	13	40x	Gen1 MCFO (40x)	NA
R13F07	attP2	pBPhsFlp2_PEST_brp_SNAP_MCFO_0128	20190917_62_G7	Tue Oct 01 17:44:15 EDT 2019	Sample#2719025747279741026	f	13	40x	Gen1 MCFO (40x)	NA
R13F10	attP2	57C10PEST_brp_SNAP_MCFO_X23_0099	20181121_66_B1	Fri Jan 04 15:35:49 EST 2019	Sample#2621163802615349346	f		40x	Gen1 MCFO (40x)	NA
R13F10	attP2	57C10PEST_brp_SNAP_MCFO_X23_0099	20181121_66_B2	Fri Jan 04 15:35:49 EST 2019	Sample#2621163803181580386	f		40x	Gen1 MCFO (40x)	NA
R13F10	attP2	57C10PEST_brp_SNAP_MCFO_X23_0099	20181121_66_B3	Fri Jan 04 15:35:49 EST 2019	Sample#2621163803752005730	f		40x	Gen1 MCFO (40x)	NA
R13F10	attP2	57C10PEST_brp_SNAP_MCFO_X23_0099	20181121_66_B4	Fri Jan 04 15:36:04 EST 2019	Sample#2621163863965433954	f		40x	Gen1 MCFO (40x)	NA
R13F10	attP2	57C10PEST_brp_SNAP_MCFO_X23_0099	20181121_66_B5	Fri Jan 04 15:36:04 EST 2019	Sample#2621163864615551074	f		40x	Gen1 MCFO (40x)	NA
R13F10	attP2	57C10PEST_brp_SNAP_MCFO_X23_0099	20181121_66_B6	Fri Jan 04 15:36:04 EST 2019	Sample#2621163865181782114	f		40x	Gen1 MCFO (40x)	NA
R13F10	attP2	pBPhsFlp2_PEST_brp_SNAP_MCFO_0128	20191015_61_F1	Fri Oct 25 16:39:45 EDT 2019	Sample#2727706825750216802	m	13	40x	Gen1 MCFO (40x)	NA
R13F10	attP2	pBPhsFlp2_PEST_brp_SNAP_MCFO_0128	20191015_61_F10	Fri Oct 25 16:39:47 EDT 2019	Sample#2727706833434181730	m	13	40x	Gen1 MCFO (40x)	NA
R13F10	attP2	pBPhsFlp2_PEST_brp_SNAP_MCFO_0128	20191015_61_F2	Fri Oct 25 16:39:45 EDT 2019	Sample#2727706826656186466	m	13	40x	Gen1 MCFO (40x)	NA
R13F10	attP2	pBPhsFlp2_PEST_brp_SNAP_MCFO_0128	20191015_61_F3	Fri Oct 25 16:39:46 EDT 2019	Sample#2727706827557961826	m	13	40x	Gen1 MCFO (40x)	NA
R13F10	attP2	pBPhsFlp2_PEST_brp_SNAP_MCFO_0128	20191015_61_F4	Fri Oct 25 16:39:46 EDT 2019	Sample#2727706828459737186	m	13	40x	Gen1 MCFO (40x)	NA
R13F10	attP2	pBPhsFlp2_PEST_brp_SNAP_MCFO_0128	20191015_61_F5	Fri Oct 25 16:39:46 EDT 2019	Sample#2727706829277626466	m	13	40x	Gen1 MCFO (40x)	NA
R13F10	attP2	pBPhsFlp2_PEST_brp_SNAP_MCFO_0128	20191015_61_F6	Fri Oct 25 16:39:46 EDT 2019	Sample#2727706830103904354	m	13	40x	Gen1 MCFO (40x)	NA
R13F10	attP2	pBPhsFlp2_PEST_brp_SNAP_MCFO_0128	20191015_61_F7	Fri Oct 25 16:39:46 EDT 2019	Sample#2727706830963736674	m	13	40x	Gen1 MCFO (40x)	NA
R13F10	attP2	pBPhsFlp2_PEST_brp_SNAP_MCFO_0128	20191015_61_F8	Fri Oct 25 16:39:47 EDT 2019	Sample#2727706831794208866	m	13	40x	Gen1 MCFO (40x)	NA
R13F10	attP2	pBPhsFlp2_PEST_brp_SNAP_MCFO_0128	20191015_61_F9	Fri Oct 25 16:39:47 EDT 2019	Sample#2727706832616292450	m	13	40x	Gen1 MCFO (40x)	NA
R13F11	attP2	57C10PEST_brp_SNAP_MCFO_X23_0099	20181121_66_C1	Fri Jan 04 15:36:04 EST 2019	Sample#2621163865748013154	f		40x	Gen1 MCFO (40x)	NA
R13F11	attP2	57C10PEST_brp_SNAP_MCFO_X23_0099	20181121_66_C2	Fri Jan 04 15:36:04 EST 2019	Sample#2621163866314244194	f		40x	Gen1 MCFO (40x)	NA
R13F11	attP2	57C10PEST_brp_SNAP_MCFO_X23_0099	20181121_66_C3	Fri Jan 04 15:36:04 EST 2019	Sample#2621163866884669538	f		40x	Gen1 MCFO (40x)	NA
R13F11	attP2	57C10PEST_brp_SNAP_MCFO_X23_0099	20181121_66_C4	Fri Jan 04 15:36:04 EST 2019	Sample#2621163867446706274	f		40x	Gen1 MCFO (40x)	NA
R13F11	attP2	57C10PEST_brp_SNAP_MCFO_X23_0099	20181121_66_C5	Fri Jan 04 15:36:05 EST 2019	Sample#2621163868054880354	f		40x	Gen1 MCFO (40x)	NA
R13F11	attP2	57C10PEST_brp_SNAP_MCFO_X23_0099	20181121_66_C6	Fri Jan 04 15:36:05 EST 2019	Sample#2621163868654665826	f		40x	Gen1 MCFO (40x)	NA
R13F12	attP2	57C10PEST_brp_SNAP_MCFO_X23_0099	20181109_61_C1	Thu Nov 29 17:44:01 EST 2018	Sample#2608150102006562914	f		40x	Gen1 MCFO (40x)	NA
R13F12	attP2	57C10PEST_brp_SNAP_MCFO_X23_0099	20181109_61_C2	Thu Nov 29 17:44:01 EST 2018	Sample#2608150102556016738	f		40x	Gen1 MCFO (40x)	NA
R13F12	attP2	57C10PEST_brp_SNAP_MCFO_X23_0099	20181109_61_C3	Thu Nov 29 17:44:01 EST 2018	Sample#2608150103101276258	f		40x	Gen1 MCFO (40x)	NA
R13F12	attP2	57C10PEST_brp_SNAP_MCFO_X23_0099	20181109_61_C4	Thu Nov 29 17:44:01 EST 2018	Sample#2608150103654924386	f		40x	Gen1 MCFO (40x)	NA
R13F12	attP2	57C10PEST_brp_SNAP_MCFO_X23_0099	20181109_61_C5	Thu Nov 29 17:44:01 EST 2018	Sample#2608150104154046562	f		40x	Gen1 MCFO (40x)	NA
R13F12	attP2	57C10PEST_brp_SNAP_MCFO_X23_0099	20181109_61_C6	Thu Nov 29 17:44:02 EST 2018	Sample#2608150104716083298	f		40x	Gen1 MCFO (40x)	NA
R13F12	attP2	pBPhsFlp2_PEST_brp_SNAP_MCFO_0128	20191011_61_C1	Tue Oct 29 14:16:23 EDT 2019	Sample#2729120295595016290	m	13	40x	Gen1 MCFO (40x)	NA
R13F12	attP2	pBPhsFlp2_PEST_brp_SNAP_MCFO_0128	20191011_61_C10	Tue Oct 29 14:16:24 EDT 2019	Sample#2729120303207678050	m	13	40x	Gen1 MCFO (40x)	NA
R13F12	attP2	pBPhsFlp2_PEST_brp_SNAP_MCFO_0128	20191011_61_C2	Tue Oct 29 14:16:23 EDT 2019	Sample#2729120296480014434	m	13	40x	Gen1 MCFO (40x)	NA
R13F12	attP2	pBPhsFlp2_PEST_brp_SNAP_MCFO_0128	20191011_61_C3	Tue Oct 29 14:16:23 EDT 2019	Sample#2729120297369206882	m	13	40x	Gen1 MCFO (40x)	NA
R13F12	attP2	pBPhsFlp2_PEST_brp_SNAP_MCFO_0128	20191011_61_C4	Tue Oct 29 14:16:23 EDT 2019	Sample#2729120298258399330	m	13	40x	Gen1 MCFO (40x)	NA
R13F12	attP2	pBPhsFlp2_PEST_brp_SNAP_MCFO_0128	20191011_61_C5	Tue Oct 29 14:16:23 EDT 2019	Sample#2729120299076288610	m	13	40x	Gen1 MCFO (40x)	NA
R13F12	attP2	pBPhsFlp2_PEST_brp_SNAP_MCFO_0128	20191011_61_C6	Tue Oct 29 14:16:24 EDT 2019	Sample#2729120299910955106	m	13	40x	Gen1 MCFO (40x)	NA
R13F12	attP2	pBPhsFlp2_PEST_brp_SNAP_MCFO_0128	20191011_61_C7	Tue Oct 29 14:16:24 EDT 2019	Sample#2729120300737232994	m	13	40x	Gen1 MCFO (40x)	NA
R13F12	attP2	pBPhsFlp2_PEST_brp_SNAP_MCFO_0128	20191011_61_C8	Tue Oct 29 14:16:24 EDT 2019	Sample#2729120301559316578	m	13	40x	Gen1 MCFO (40x)	NA
R13F12	attP2	pBPhsFlp2_PEST_brp_SNAP_MCFO_0128	20191011_61_C9	Tue Oct 29 14:16:24 EDT 2019	Sample#2729120302381400162	m	13	40x	Gen1 MCFO (40x)	NA
R13G04	attP2	57C10PEST_attp18_4stop1	20170203_24_E1	Thu Feb 09 14:45:28 EST 2017	Sample#2369653955115352162	f		20x	Annotator Gen1 MCFO	Masayoshi Ito
R13G04	attP2	57C10PEST_attp18_4stop1	20170203_24_E2	Thu Feb 09 14:45:28 EST 2017	Sample#2369653955274735714	f		20x, 63x	Annotator Gen1 MCFO	Masayoshi Ito
R13G04	attP2	57C10PEST_attp18_4stop1	20170203_24_E3	Thu Feb 09 14:45:29 EST 2017	Sample#2369653955438313570	f		20x	Annotator Gen1 MCFO	Masayoshi Ito
R13G04	attP2	57C10PEST_attp18_4stop1	20170203_24_E4	Thu Feb 09 14:45:29 EST 2017	Sample#2369653955610280034	f		20x, 63x	Annotator Gen1 MCFO	Masayoshi Ito
R13G04	attP2	57C10PEST_attp18_4stop1	20170203_24_E5	Thu Feb 09 14:45:29 EST 2017	Sample#2369653955773857890	f		20x, 63x	Annotator Gen1 MCFO	Masayoshi Ito
R13G04	attP2	57C10PEST_attp18_4stop1	20170203_24_E6	Thu Feb 09 14:45:29 EST 2017	Sample#2369653955933241442	f		20x, 63x	Annotator Gen1 MCFO	Masayoshi Ito
R13G04	attP2	57C10PEST_attp18_4stop1	20170203_24_E7	Thu Feb 09 14:45:29 EST 2017	Sample#2369653956092624994	f		20x	Annotator Gen1 MCFO	Masayoshi Ito
R13G04	attP2	57C10PEST_attp18_4stop1	20170203_24_E8	Thu Feb 09 14:45:29 EST 2017	Sample#2369653956252008546	f		20x, 63x	Annotator Gen1 MCFO	Masayoshi Ito
R13G04	attP2	57C10L_brp_SNAP_MCFO_X23_0117	20190614_63_A1	Tue Jul 02 14:15:03 EDT 2019	Sample#2685995807399739490	m		40x	Gen1 MCFO (40x)	NA
R13G04	attP2	57C10L_brp_SNAP_MCFO_X23_0117	20190614_63_A2	Tue Jul 02 14:15:03 EDT 2019	Sample#2685995807844335714	m		40x	Gen1 MCFO (40x)	NA
R13G04	attP2	57C10L_brp_SNAP_MCFO_X23_0117	20190614_63_A4	Tue Jul 02 14:15:04 EDT 2019	Sample#2685995808712556642	m		40x	Gen1 MCFO (40x)	NA
R13G04	attP2	57C10L_brp_SNAP_MCFO_X23_0117	20190614_63_A5	Tue Jul 02 14:15:04 EDT 2019	Sample#2685995809144569954	m		40x	Gen1 MCFO (40x)	NA
R13G04	attP2	57C10L_brp_SNAP_MCFO_X23_0117	20190614_63_A6	Tue Jul 02 14:15:04 EDT 2019	Sample#2685995809568194658	m		40x	Gen1 MCFO (40x)	NA
R13G04	attP2	pBPhsFlp2_PEST_brp_SNAP_MCFO_0128	20190702_65_D1	Wed Jul 24 12:49:24 EDT 2019	Sample#2693946785390395490	f	40	40x	Gen1 MCFO (40x)	NA
R13G04	attP2	pBPhsFlp2_PEST_brp_SNAP_MCFO_0128	20190702_65_D2	Wed Jul 24 12:49:24 EDT 2019	Sample#2693946785834991714	f	40	40x	Gen1 MCFO (40x)	NA
R13G04	attP2	pBPhsFlp2_PEST_brp_SNAP_MCFO_0128	20190702_65_D3	Wed Jul 24 12:49:24 EDT 2019	Sample#2693946786279587938	f	40	40x	Gen1 MCFO (40x)	NA
R13G04	attP2	pBPhsFlp2_PEST_brp_SNAP_MCFO_0128	20190702_65_D4	Wed Jul 24 12:49:25 EDT 2019	Sample#2693946786673852514	f	40	40x	Gen1 MCFO (40x)	NA
R13G04	attP2	pBPhsFlp2_PEST_brp_SNAP_MCFO_0128	20190702_65_D5	Wed Jul 24 12:49:25 EDT 2019	Sample#2693946787076505698	f	40	40x	Gen1 MCFO (40x)	NA
R13G04	attP2	pBPhsFlp2_PEST_brp_SNAP_MCFO_0128	20190702_65_D6	Wed Jul 24 12:49:25 EDT 2019	Sample#2693946787466575970	f	40	40x	Gen1 MCFO (40x)	NA
R13G06	attP2	57C10PEST_brp_SNAP_MCFO_X23_0099	20180831_62_I1	Tue Sep 18 16:17:41 EDT 2018	Sample#2582021350239502434	f		40x	Gen1 MCFO (40x)	NA
R13G06	attP2	57C10PEST_brp_SNAP_MCFO_X23_0099	20180831_62_I2	Thu Sep 20 14:26:26 EDT 2018	Sample#2582718129159274594	f		40x	Gen1 MCFO (40x)	NA
R13G06	attP2	57C10PEST_brp_SNAP_MCFO_X23_0099	20180831_62_I3	Tue Sep 18 16:17:41 EDT 2018	Sample#2582021350541492322	f		40x	Gen1 MCFO (40x)	NA
R13G06	attP2	57C10PEST_brp_SNAP_MCFO_X23_0099	20180831_62_I4	Tue Sep 18 16:17:41 EDT 2018	Sample#2582021350839287906	f		40x	Gen1 MCFO (40x)	NA
R13G06	attP2	57C10PEST_brp_SNAP_MCFO_X23_0099	20180831_62_I5	Tue Sep 18 16:17:41 EDT 2018	Sample#2582021351141277794	f		40x	Gen1 MCFO (40x)	NA
R13G06	attP2	57C10PEST_brp_SNAP_MCFO_X23_0099	20180831_62_I6	Tue Oct 02 13:42:21 EDT 2018	Sample#2587055690300260450	f		40x	Gen1 MCFO (40x)	NA
R13G10	attP2	57C10PEST_attp8_3stop1	20130520_3_F4	Mon Feb 24 14:16:08 EST 2014	Sample#1977905289092923490	f		20x	Annotator Gen1 MCFO	Tanya Wolff
R13G10	attP2	57C10PEST_attp8_3stop1	20130520_3_F5	Mon Feb 24 14:16:08 EST 2014	Sample#1977905289596239970	f		20x	Annotator Gen1 MCFO	Tanya Wolff
R13G10	attP2	57C10PEST_attp8_3stop1	20130520_3_F6	Mon Feb 24 14:16:08 EST 2014	Sample#1977905290040836194	f		20x	Annotator Gen1 MCFO	Tanya Wolff
R13G10	attP2	57C10PEST_attp8_3stop1	20130520_3_G1	Mon Feb 24 14:16:08 EST 2014	Sample#1977905290460266594	f		20x	Annotator Gen1 MCFO	Tanya Wolff
R13G10	attP2	57C10PEST_attp8_3stop1	20130520_3_G2	Mon Feb 24 14:16:09 EST 2014	Sample#1977905290942611554	f		20x	Annotator Gen1 MCFO	Tanya Wolff
R13G10	attP2	57C10PEST_attp8_3stop1	20130520_3_G3	Mon Feb 24 14:16:09 EST 2014	Sample#1977905291450122338	f		20x	Annotator Gen1 MCFO	Tanya Wolff
R13G10	attP2	57C10PEST_attp8_3stop1	20130520_3_G4	Mon Feb 24 14:16:09 EST 2014	Sample#1977905291991187554	f		20x	Annotator Gen1 MCFO	Tanya Wolff
R13G10	attP2	57C10PEST_attp8_3stop1	20130520_3_G5	Mon Feb 24 14:16:09 EST 2014	Sample#1977905292322537570	f		20x	Annotator Gen1 MCFO	Tanya Wolff
R13G10	attP2	57C10PEST_attp8_3stop1	20130520_3_G6	Mon Feb 24 14:16:09 EST 2014	Sample#1977905292691636322	f		20x	Annotator Gen1 MCFO	Tanya Wolff
R13G10	attP2	57C10PEST_attp8_3stop1	20130520_3_H1	Mon Feb 24 14:16:09 EST 2014	Sample#1977905293098483810	f		20x	Annotator Gen1 MCFO	Tanya Wolff
R13G10	attP2	57C10PEST_attp8_3stop1	20130520_3_H2	Mon Feb 24 14:16:09 EST 2014	Sample#1977905293509525602	f		20x	Annotator Gen1 MCFO	Tanya Wolff
R13G10	attP2	57C10PEST_attp8_3stop1	20130520_3_H3	Mon Feb 24 14:16:09 EST 2014	Sample#1977905293840875618	f		20x	Annotator Gen1 MCFO	Tanya Wolff
R13G10	attP2	57C10PEST_attp8_3stop1	20130520_3_H4	Mon Feb 24 14:16:09 EST 2014	Sample#1977905294226751586	f		20x	Annotator Gen1 MCFO	Tanya Wolff
R13G10	attP2	57C10PEST_attp8_3stop1	20130725_1_E6	Tue May 13 14:09:24 EDT 2014	Sample#2006154750134845538	f		20x	Annotator Gen1 MCFO	Tanya Wolff
R13G10	attP2	57C10PEST_attp8_3stop1	20130725_1_F1	Tue May 13 14:09:25 EDT 2014	Sample#2006154751024037986	f		20x	Annotator Gen1 MCFO	Tanya Wolff
R13G10	attP2	57C10PEST_attp8_3stop1	20130725_1_F3	Tue May 13 14:09:25 EDT 2014	Sample#2006154752882114658	f		20x	Annotator Gen1 MCFO	Tanya Wolff
R13G10	attP2	57C10PEST_attp8_3stop1	20130725_1_F4	Tue May 13 14:09:25 EDT 2014	Sample#2006154753909719138	f		20x	Annotator Gen1 MCFO	Tanya Wolff
R13G10	attP2	57C10PEST_attp8_3stop1	20130725_1_F6	Tue May 13 14:09:26 EDT 2014	Sample#2006154755658743906	f		20x	Annotator Gen1 MCFO	Tanya Wolff
R13G10	attP2	57C10PEST_brp_SNAP_MCFO_X23_0099	20180831_62_J1	Tue Oct 02 13:42:21 EDT 2018	Sample#2587055690627416162	f		40x	Gen1 MCFO (40x)	NA
R13G10	attP2	57C10PEST_brp_SNAP_MCFO_X23_0099	20180831_62_J2	Tue Oct 02 13:42:21 EDT 2018	Sample#2587055690946183266	f		40x	Gen1 MCFO (40x)	NA
R13G10	attP2	57C10PEST_brp_SNAP_MCFO_X23_0099	20180831_62_J3	Tue Oct 02 13:42:21 EDT 2018	Sample#2587055691277533282	f		40x	Gen1 MCFO (40x)	NA
R13G10	attP2	57C10PEST_brp_SNAP_MCFO_X23_0099	20180831_62_J4	Tue Oct 02 13:42:22 EDT 2018	Sample#2587055691600494690	f		40x	Gen1 MCFO (40x)	NA
R13G10	attP2	57C10PEST_brp_SNAP_MCFO_X23_0099	20180831_62_J5	Tue Oct 02 13:42:22 EDT 2018	Sample#2587055691906678882	f		40x	Gen1 MCFO (40x)	NA
R13G10	attP2	57C10PEST_brp_SNAP_MCFO_X23_0099	20180831_62_J6	Thu Jun 06 14:13:20 EDT 2019	Sample#2676573289337323618	f		40x	Gen1 MCFO (40x)	NA
R13H04	attP2	hsPESTOPT_attP3_3stop1_X_0036	20160513_26_B1	Wed Jun 15 15:09:15 EDT 2016	Sample#2283034135373021221	f	15	20x, 63x	Annotator Gen1 MCFO	Shigehiro Namiki
R13H04	attP2	hsPESTOPT_attP3_3stop1_X_0036	20160513_26_B2	Fri May 20 09:48:51 EDT 2016	Sample#2273531422146822242	f	15	20x	Annotator Gen1 MCFO	Shigehiro Namiki
R13H04	attP2	hsPESTOPT_attP3_3stop1_X_0036	20160513_26_B3	Wed Jun 15 15:09:50 EDT 2016	Sample#2283034282274324517	f	15	20x, 63x	Annotator Gen1 MCFO	Shigehiro Namiki
R13H04	attP2	hsPESTOPT_attP3_3stop1_X_0036	20160513_26_B4	Wed Jun 15 15:09:58 EDT 2016	Sample#2283034316021694501	f	15	20x, 63x	Annotator Gen1 MCFO	Shigehiro Namiki
R13H04	attP2	hsPESTOPT_attP3_3stop1_X_0036	20160513_26_B5	Wed Jun 15 15:10:07 EDT 2016	Sample#2283034357268480037	f	15	20x, 63x	Annotator Gen1 MCFO	Shigehiro Namiki
R13H04	attP2	hsPESTOPT_attP3_3stop1_X_0036	20160513_26_B6	Fri May 20 09:48:54 EDT 2016	Sample#2273531432364146786	f	15	20x	Annotator Gen1 MCFO	Shigehiro Namiki
R13H04	attP2	hsPESTOPT_attP3_3stop1_X_0036	20160513_26_C1	Wed Jun 15 15:10:20 EDT 2016	Sample#2283034410179624997	f	15	20x, 63x	Annotator Gen1 MCFO	Shigehiro Namiki
R13H04	attP2	57C10PEST_brp_SNAP_MCFO_X23_0099	20180831_63_A1	Mon Sep 24 18:49:24 EDT 2018	Sample#2584233859549757538	f		40x	Gen1 MCFO (40x)	NA
R13H04	attP2	57C10PEST_brp_SNAP_MCFO_X23_0099	20180831_63_A2	Mon Sep 24 18:49:24 EDT 2018	Sample#2584233859876913250	f		40x	Gen1 MCFO (40x)	NA
R13H04	attP2	57C10PEST_brp_SNAP_MCFO_X23_0099	20180831_63_A3	Mon Sep 24 18:49:25 EDT 2018	Sample#2584233860191486050	f		40x	Gen1 MCFO (40x)	NA
R13H04	attP2	57C10PEST_brp_SNAP_MCFO_X23_0099	20180831_63_A4	Mon Sep 24 18:49:25 EDT 2018	Sample#2584233860497670242	f		40x	Gen1 MCFO (40x)	NA
R13H04	attP2	57C10PEST_brp_SNAP_MCFO_X23_0099	20180831_63_A5	Mon Sep 24 18:49:25 EDT 2018	Sample#2584233860803854434	f		40x	Gen1 MCFO (40x)	NA
R13H04	attP2	57C10PEST_brp_SNAP_MCFO_X23_0099	20180831_63_A6	Mon Sep 24 18:49:25 EDT 2018	Sample#2584233861105844322	f		40x	Gen1 MCFO (40x)	NA
R13H04	attP2	57C10PEST_brp_SNAP_MCFO_X23_0099	20180831_63_B1	Mon Sep 24 18:49:25 EDT 2018	Sample#2584233861412028514	f		40x	Gen1 MCFO (40x)	NA
R13H04	attP2	57C10PEST_brp_SNAP_MCFO_X23_0099	20180831_63_B2	Mon Sep 24 18:49:25 EDT 2018	Sample#2584233861718212706	f		40x	Gen1 MCFO (40x)	NA
R13H04	attP2	57C10PEST_brp_SNAP_MCFO_X23_0099	20180831_63_B3	Mon Sep 24 18:49:25 EDT 2018	Sample#2584233862024396898	f		40x	Gen1 MCFO (40x)	NA
R14A01	attP2	57C10PEST_brp_SNAP_MCFO_X23_0099	20181121_66_D1	Fri Jan 04 15:36:05 EST 2019	Sample#2621163869254451298	f		40x	Gen1 MCFO (40x)	NA
R14A01	attP2	57C10PEST_brp_SNAP_MCFO_X23_0099	20181121_66_D2	Fri Jan 04 15:36:05 EST 2019	Sample#2621163869841653858	f		40x	Gen1 MCFO (40x)	NA
R14A01	attP2	57C10PEST_brp_SNAP_MCFO_X23_0099	20181121_66_D3	Fri Jan 04 15:36:05 EST 2019	Sample#2621163870416273506	f		40x	Gen1 MCFO (40x)	NA
R14A01	attP2	57C10PEST_brp_SNAP_MCFO_X23_0099	20181121_66_D4	Fri Jan 04 15:36:05 EST 2019	Sample#2621163870944755810	f		40x	Gen1 MCFO (40x)	NA
R14A01	attP2	57C10PEST_brp_SNAP_MCFO_X23_0099	20181121_66_D5	Fri Jan 04 15:36:05 EST 2019	Sample#2621163871531958370	f		40x	Gen1 MCFO (40x)	NA
R14A01	attP2	57C10PEST_brp_SNAP_MCFO_X23_0099	20181121_66_D6	Fri Jan 04 15:36:05 EST 2019	Sample#2621163872119160930	f		40x	Gen1 MCFO (40x)	NA
R14A01	attP2	pBPhsFlp2_PEST_brp_SNAP_MCFO_0128	20191025_61_A1	Tue Nov 05 12:57:35 EST 2019	Sample#2731652282029441122	m	40	40x	Gen1 MCFO (40x)	NA
R14A01	attP2	pBPhsFlp2_PEST_brp_SNAP_MCFO_0128	20191025_61_A2	Tue Nov 05 12:57:35 EST 2019	Sample#2731652282973159522	m	40	40x	Gen1 MCFO (40x)	NA
R14A01	attP2	pBPhsFlp2_PEST_brp_SNAP_MCFO_0128	20191025_61_A3	Tue Nov 05 12:57:36 EST 2019	Sample#2731652283950432354	m	40	40x	Gen1 MCFO (40x)	NA
R14A01	attP2	pBPhsFlp2_PEST_brp_SNAP_MCFO_0128	20191025_61_A4	Tue Nov 05 12:57:36 EST 2019	Sample#2731652284801876066	m	40	40x	Gen1 MCFO (40x)	NA
R14A01	attP2	pBPhsFlp2_PEST_brp_SNAP_MCFO_0128	20191025_61_A5	Tue Nov 05 12:57:36 EST 2019	Sample#2731652285657514082	m	40	40x	Gen1 MCFO (40x)	NA
R14A01	attP2	pBPhsFlp2_PEST_brp_SNAP_MCFO_0128	20191025_61_A6	Tue Nov 05 12:57:36 EST 2019	Sample#2731652286508957794	m	40	40x	Gen1 MCFO (40x)	NA
R14A02	attP2	57C10PEST_attp18_4stop1	20160422_20_A1	Thu May 12 07:17:15 EDT 2016	Sample#2270594167321133093	f		20x	Annotator Gen1 MCFO	Jens Goldammer
R14A02	attP2	57C10PEST_attp18_4stop1	20160422_20_A2	Mon Jun 06 07:48:54 EDT 2016	Sample#2279661827941990437	f		20x, 63x	Annotator Gen1 MCFO	Jens Goldammer
R14A02	attP2	57C10PEST_attp18_4stop1	20160422_20_A3	Fri Apr 29 16:18:28 EDT 2016	Sample#2266019329592000549	f		20x	Annotator Gen1 MCFO	Jens Goldammer
R14A02	attP2	57C10PEST_attp18_4stop1	20160422_20_A4	Fri Apr 29 16:18:28 EDT 2016	Sample#2266019329948516389	f		20x	Annotator Gen1 MCFO	Jens Goldammer
R14A02	attP2	57C10PEST_attp18_4stop1	20160422_20_A5	Mon Jun 06 07:48:56 EDT 2016	Sample#2279661836863275045	f		20x, 63x	Annotator Gen1 MCFO	Jens Goldammer
R14A02	attP2	57C10PEST_attp18_4stop1	20160422_20_A6	Fri Apr 29 16:18:29 EDT 2016	Sample#2266019330669936677	f		20x	Annotator Gen1 MCFO	Jens Goldammer
R14A02	attP2	57C10PEST_attp18_4stop1	20160422_20_A7	Mon Jun 06 07:48:58 EDT 2016	Sample#2279661844232667173	f		20x, 63x	Annotator Gen1 MCFO	Jens Goldammer
R14A02	attP2	57C10PEST_attp18_4stop1	20160422_20_A8	Mon Jun 06 07:48:59 EDT 2016	Sample#2279661850096304165	f		20x, 63x	Annotator Gen1 MCFO	Jens Goldammer
R14A02	attP2	57C10PEST_brp_SNAP_MCFO_X23_0099	20180905_65_A1	Mon Oct 15 16:39:24 EDT 2018	Sample#2591811286840901730	f		40x	Gen1 MCFO (40x)	NA
R14A02	attP2	57C10PEST_brp_SNAP_MCFO_X23_0099	20180905_65_A2	Mon Oct 15 16:39:24 EDT 2018	Sample#2591811287172251746	f		40x	Gen1 MCFO (40x)	NA
R14A02	attP2	57C10PEST_brp_SNAP_MCFO_X23_0099	20180905_65_A3	Mon Oct 15 16:39:24 EDT 2018	Sample#2591811287495213154	f		40x	Gen1 MCFO (40x)	NA
[truncated: 72,364 more rows]
